# Supplementary material for: Efficient synthesis of chiral β-hydroxy sulfones via iridium-catalyzed hydrogenation
Source: Royal Society of Chemistry journal article supplement (doi:10.1039/c8ob02923g), 2019-01-01
Supplement: c8ob02923g1.pdf [file c8ob02923g1.pdf]

## ***Supporting Information***

# **Efficient Synthesis of Chiral $\beta$ -Hydroxy Sulfones via Iridium-Catalyzed Hydrogenation**

Lin Tao,<sup>†a</sup> Congcong Yin,<sup>†a</sup> Xiu-Qin Dong,<sup>\*a</sup> and Xumu Zhang<sup>\*a,b</sup>

<sup>a</sup> Key Laboratory of Biomedical Polymers, Engineering Research Center of Organosilicon Compounds & Materials, Ministry of Education, College of Chemistry and Molecular Sciences, Wuhan University, Wuhan, Hubei, 430072, P. R. China.

<sup>b</sup> Department of Chemistry and Shenzhen Grubbs Institute, Southern University of Science and Technology, Shenzhen, Guangdong, 518055, P. R. China.

<sup>†</sup> Lin Tao and Congcong Yin contributed equally to this work.

E-mail: zhangxm@sustc.edu.cn, xiuqindong@whu.edu.cn.

## **Contents**

|                                                                    |    |
|--------------------------------------------------------------------|----|
| 1. General remarks .....                                           | 2  |
| 2. General procedure for synthesis of $\beta$ -keto sulfones ..... | 2  |
| 3. General procedure for asymmetric hydrogenation .....            | 3  |
| 4. NMR spectra .....                                               | 12 |
| 5. HPLC spectra .....                                              | 31 |
| 6. Reference .....                                                 | 67 |

## 1. General remarks

All reactions and manipulations which are sensitive to moisture or air were performed in an argon-filled glovebox or using standard Schlenk techniques. Hydrogen gas (99.999%) was purchased from Shanghai Regulator Factory Co., Ltd. Anhydrous hexane, THF, 1,4-dioxane and toluene was distilled from sodium benzophenone ketyl. Anhydrous *i*-PrOH, DCE, CHCl<sub>3</sub>, CH<sub>2</sub>Cl<sub>2</sub> were freshly distilled from calcium hydride. Anhydrous MeOH and EtOH were freshly distilled from Mg. Solvents were transferred by syringe. [Ir(COD)Cl]<sub>2</sub> was prepared according to the literature. <sup>1</sup>H and <sup>13</sup>C spectra were recorded with a Bruker ADVANCE III (400 MHz) spectrometer with CDCl<sub>3</sub> as the solvent and tetramethylsilane (TMS) as the internal standard. Chemical shifts are reported in parts per million (ppm, δ scale) downfield from TMS at 0.00 ppm and referenced to the CDCl<sub>3</sub> at 7.26 ppm (for <sup>1</sup>H NMR) or 77.00 ppm (for <sup>13</sup>C NMR). Data are reported as: multiplicity (s = singlet, d = doublet, t = triplet, q = quartet, m = multiplet), coupling constant in hertz (Hz) and signal area integration in natural numbers. <sup>13</sup>C NMR analyses were run with decoupling. Optical rotations [ $\alpha$ ]<sub>D</sub> were determined using a PERKIN ELMER polarimeter 343 instrument. HPLC analyses were performed using Daicel chiral column on an Agilent 1260 Series HPLC instrument.

## 2. General procedure for synthesis of $\beta$ -keto sulfones

### Method A:

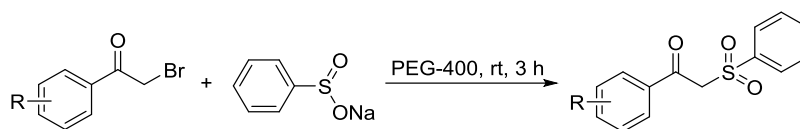

In a 150 mL flask, bromoacetophenone (3.0 mmol) and sodium phenylsulfite (3.3 mmol) were added to the flask, and then 30 mL polyethylene glycol 400 was poured into the flask and stirred for 3 h at room temperature. The reaction system was extracted with ethyl acetate three times, then washed with water to remove polyethylene glycol three times, and then dried with anhydrous sodium sulfate. Then the reaction mixture was concentrated under reduced pressure, and the resulting residue was separated by column chromatography (petroleum ether:EtOAc = 6:1) to give the desired products.

The product can be further purified by recrystallization from dichloromethane.

#### Method B:

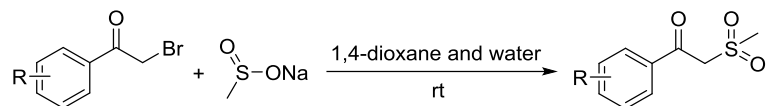

Bromoacetophenone (3.0 mmol) was added to a 150 mL flask, and then 20 mL 1,4-dioxane was added to dissolve it. Then 20 mL water solution of sodium methylene sulfite was added to the flask, and the reaction system was reacted at room temperature for 3 h. 1,4-Dioxane in the reaction system was removed by rotary evaporator, then a small amount of water was added, and then dichloromethane was used to extract the reaction system. Then the reaction mixture was concentrated under reduced pressure, and the resulting residue was separated by column chromatography (petroleum ether:EtOAc = 6:1) to give the desired products. The product can be further purified by recrystallization from dichloromethane.

Substrates **1a-1j**, **1q-1r** were prepared through method A.<sup>[1]</sup> Substrates **1k-1p** were prepared through method B.<sup>[2]</sup> The absolute configuration of product **2a** was determined by comparison of analytical data (optical rotation) with the literature.<sup>[3-4]</sup> The absolute configuration of others were assigned by analogy.

#### 1-(2-fluorophenyl)-2-(methylsulfonyl)ethanone **1l**

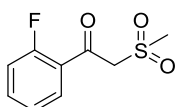

White solid, 476.3 mg, 73% yield; <sup>1</sup>H NMR (400 MHz, CDCl<sub>3</sub>) δ 7.94 (td, *J* = 7.7, 1.9 Hz, 1H), 7.67-7.61 (m, 1H), 7.32-7.28 (m, 1H), 7.23-7.18 (m, 1H), 4.68 (s, 2H), 3.18 (s, 3H). <sup>13</sup>C NMR (100 MHz, CDCl<sub>3</sub>) δ 187.1 (d, *J* = 3.0 Hz), 162.1 (d, *J* = 254.0 Hz), 136.6 (d, *J* = 10.0 Hz), 131.1 (d, *J* = 1.0 Hz), 125.0 (d, *J* = 4.0 Hz), 124.2 (d, *J* = 11.0 Hz), 117.0 (d, *J* = 24.0 Hz), 64.9 (d, *J* = 9.0 Hz), 42.3.

### 3. General procedure for asymmetric hydrogenation

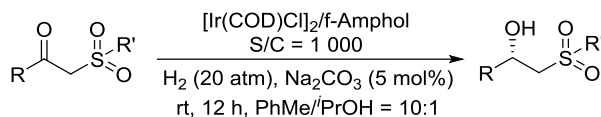

General procedure (at S/C = 1 000): To a 4.0 mL vial was added the catalyst precursor [Ir(COD)Cl]<sub>2</sub> (1.4 mg, 2.0×10<sup>-3</sup> mmol), ligand **L4** (3.3 mg, 4.2×10<sup>-3</sup> mmol) and anhydrous isopropanol (2.0 mL) in the argon-filled glovebox. The mixture was stirred for 2.0 h at 25 °C giving orange red solution. And then 0.2 mmol β-keto sulfones, Na<sub>2</sub>CO<sub>3</sub> (1.06 mg, 0.01 mmol) were added into a 5 mL hydrogenation vessel. 1.0 mL anhydrous toluene was added as solvent and a solution of Ir/f-Amphol **L4** in anhydrous isopropanol (100 μL) was added via an injection port. Then the vessel was placed in an autoclave, closed it and moved it out from glovebox. The autoclave quickly purged with hydrogen gas for three times, then pressurized to 20 atm H<sub>2</sub>. The reaction solution was stirred at room temperature until for 12 h, then released pressure carefully. The solution of reaction mixture was purified by a flash chromatography on a silical gel with ethyl acetate and the solvent was removed under reduced pressure. The product was analyzed by NMR spectroscopy for conversion and chiral HPLC for ee values.

(*S*)-1-phenyl-2-(phenylsulfonyl)ethan-1-ol **2a**

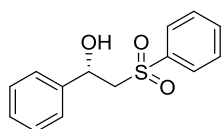

White solid, 99% yield, 51.9 mg; 95% ee; [ $\alpha$ ]<sub>D</sub><sup>25</sup> = +27.2 (c = 1.50, CHCl<sub>3</sub>). The enantiomeric excess was determined by HPLC on Chiracel OJ-H column, 220 nm, 20 °C, *n*-hexane: *i*-PrOH = 80:20; flow 1.0 mL/min; *t*<sub>R</sub> (minor) = 31.6 min, *t*<sub>R</sub> (major) = 33.6 min. <sup>1</sup>H NMR (400 MHz, CDCl<sub>3</sub>) δ 7.99–7.96 (m, 2H), 7.72–7.68 (m, 1H), 7.63–7.58 (m, 2H), 7.35–7.28 (m, 5H), 5.30–5.27 (m, 1H), 3.68 (d, *J* = 2.1 Hz, 1H), 3.54–3.33 (m, 2H). <sup>13</sup>C NMR (100 MHz, CDCl<sub>3</sub>) δ 140.6, 139.1, 134.1, 129.5, 128.8, 128.4, 128.0, 125.6, 68.4, 63.9.

(*S*)-1-(2-methoxyphenyl)-2-(phenylsulfonyl)ethan-1-ol **2b**



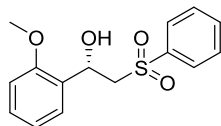

S/C = 500, 0.1 mmol substrate, Na<sub>2</sub>CO<sub>3</sub> (10 mol%). White solid, 99% yield, 28.9 mg; >99% ee;  $[\alpha]_{\text{D}}^{25} = +24.3$  ( $c = 1.50$ , CHCl<sub>3</sub>). The enantiomeric excess was determined by HPLC on Chirapak AD-H column, 210 nm, 20 °C, *n*-hexane: *i*-PrOH = 90:10; flow 1.0 mL/min;  $t_{\text{R}}$  (minor) = 34.6 min,  $t_{\text{R}}$  (major) = 41.0 min. <sup>1</sup>H NMR (400 MHz, CDCl<sub>3</sub>)  $\delta$  7.97–7.95 (m, 2H), 7.70–7.66 (m, 1H), 7.61–7.57 (m, 2H), 7.49–7.46 (m, 1H), 7.25–7.21 (m, 1H), 6.99–6.95 (m, 1H), 6.76–6.73 (m, 1H), 5.35–5.32 (m, 1H), 3.70 (d,  $J = 4.0$  Hz, 1H), 3.60 (s, 3H), 3.58–3.40 (m, 2H). <sup>13</sup>C NMR (100 MHz, CDCl<sub>3</sub>)  $\delta$  155.2, 139.2, 133.7, 129.2, 129.0, 128.3, 128.1, 126.4, 120.9, 110.1, 64.4, 61.9, 55.0.

(*S*)-1-(3-methoxyphenyl)-2-(phenylsulfonyl)ethan-1-ol **2c**

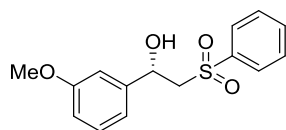

White solid, 98% yield, 57.3 mg; 96% ee;  $[\alpha]_{\text{D}}^{25} = +17.4$  ( $c = 1.50$ , CHCl<sub>3</sub>). The enantiomeric excess was determined by HPLC on Chiracel OJ-H column, 220 nm, 20 °C, *n*-hexane: *i*-PrOH = 80:20; flow 1.0 mL/min;  $t_{\text{R}}$  (minor) = 34.5 min,  $t_{\text{R}}$  (major) = 43.9 min. <sup>1</sup>H NMR (400 MHz, CDCl<sub>3</sub>)  $\delta$  7.98–7.95 (m, 2H), 7.72–7.68 (m, 1H), 7.62–7.58 (m, 2H), 7.23 (t,  $J = 7.9$  Hz, 1H), 6.88–6.79 (m, 3H), 5.27–5.25 (m, 1H), 3.78 (s, 3H), 3.67 (d,  $J = 2.2$  Hz, 1H), 3.53–3.32 (m, 2H). <sup>13</sup>C NMR (100 MHz, CDCl<sub>3</sub>)  $\delta$  159.9, 142.2, 139.1, 134.1, 129.8, 129.5, 128.0, 117.8, 113.9, 111.1, 68.3, 63.9, 55.3.

(*S*)-1-(4-methoxyphenyl)-2-(phenylsulfonyl)ethan-1-ol **2d**

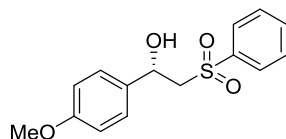

White solid, 99% yield, 57.8 mg; 98% ee;  $[\alpha]_{\text{D}}^{25} = +13.9$  ( $c = 1.50$ , CHCl<sub>3</sub>). The enantiomeric excess was determined by HPLC on Chiracel AD-H column, 210 nm, 20

°C, *n*-hexane: *i*-PrOH = 90:10; flow 0.5 mL/min;  $t_R$  (major) = 132.5 min,  $t_R$  (minor) = 141.1 min.  $^1\text{H}$  NMR (400 MHz,  $\text{CDCl}_3$ )  $\delta$  7.97–7.95 (m, 2H), 7.71–7.67 (m, 1H), 7.62–7.57 (m, 2H), 7.23–7.20 (m, 2H), 6.86–6.83 (m, 2H), 5.25–5.21 (m, 1H), 3.78 (s, 3H), 3.61 (d,  $J$  = 2.0 Hz, 1H), 3.54–3.30 (m, 2H).  $^{13}\text{C}$  NMR (100 MHz,  $\text{CDCl}_3$ )  $\delta$  159.5, 139.2, 134.1, 132.7, 129.4, 128.0, 127.0, 114.1, 68.1, 63.9, 55.3.

(*S*)-1-(2-fluorophenyl)-2-(phenylsulfonyl)ethan-1-ol **2e**

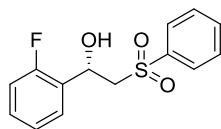

White solid, 97% yield, 54.4 mg; 90% ee;  $[\alpha]_D^{25} = +6.6$  ( $c$  = 1.50,  $\text{CHCl}_3$ ). The enantiomeric excess was determined by HPLC on Chiracel OJ-H column, 220 nm, 20 °C, *n*-hexane: *i*-PrOH = 80:20; flow 1.0 mL/min;  $t_R$  (major) = 25.3 min,  $t_R$  (minor) = 31.4 min.  $^1\text{H}$  NMR (400 MHz,  $\text{CDCl}_3$ )  $\delta$  7.98–7.95 (m, 2H), 7.72–7.68 (m, 1H), 7.62–7.53 (m, 3H), 7.26–7.24 (m, 1H), 7.18–7.14 (m, 1H), 6.97–6.92 (m, 1H), 5.46–5.45 (m, 1H), 3.84 (d,  $J$  = 2.7 Hz, 1H), 3.50–3.48 (m, 2H).  $^{13}\text{C}$  NMR (100 MHz,  $\text{CDCl}_3$ )  $\delta$  159.0 (d,  $J$  = 244.0 Hz), 138.8, 134.1, 129.8 (d,  $J$  = 8.0 Hz), 129.4, 128.0, 127.5 (d,  $J$  = 12.0 Hz), 127.3 (d,  $J$  = 4.0 Hz), 124.6 (d,  $J$  = 4.0 Hz), 115.3 (d,  $J$  = 21.0 Hz), 63.0 (d,  $J$  = 3.0 Hz), 62.2 (d,  $J$  = 1.0 Hz).

(*S*)-1-(4-fluorophenyl)-2-(phenylsulfonyl)ethan-1-ol **2f**

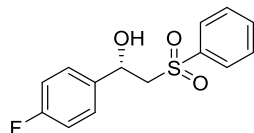

White solid, 98% yield, 54.9 mg; 95% ee;  $[\alpha]_D^{25} = +24.8$  ( $c$  = 1.50,  $\text{CHCl}_3$ ). The enantiomeric excess was determined by HPLC on Chiracel OJ-H column, 220 nm, 20 °C, *n*-hexane: *i*-PrOH = 80:20; flow 1.0 mL/min;  $t_R$  (minor) = 27.3 min,  $t_R$  (major) = 33.3 min.  $^1\text{H}$  NMR (400 MHz,  $\text{CDCl}_3$ )  $\delta$  7.98–7.95 (m, 2H), 7.73–7.68 (m, 1H), 7.63–7.58 (m, 2H), 7.30–7.26 (m, 2H), 7.03–6.99 (m, 2H), 5.29–5.27 (m, 1H), 3.76 (d,  $J$  = 2.1 Hz, 1H), 3.52–3.29 (m, 2H).  $^{13}\text{C}$  NMR (100 MHz,  $\text{CDCl}_3$ )  $\delta$  162.5 (d,  $J$  = 246.0 Hz),

139.0, 136.4 (d,  $J = 4.0$  Hz), 134.2, 129.5, 127.9, 127.4 (d,  $J = 8.0$  Hz), 115.7 (d,  $J = 22.0$  Hz), 67.8, 63.9.

(*S*)-1-(3-bromophenyl)-2-(phenylsulfonyl)ethan-1-ol **2g**

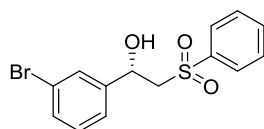

White solid, 96% yield, 65.5 mg; 94% ee;  $[\alpha]_{\text{D}}^{25} = +21.5$  ( $c = 1.50$ ,  $\text{CHCl}_3$ ). The enantiomeric excess was determined by HPLC on Chirapak AD-H column, 210 nm, 20 °C, *n*-hexane: *i*-PrOH = 90:10; flow 1.0 mL/min;  $t_{\text{R}}$  (minor) = 28.4 min,  $t_{\text{R}}$  (major) = 34.9 min.  $^1\text{H}$  NMR (400 MHz,  $\text{CDCl}_3$ )  $\delta$  7.97–7.95 (m, 2H), 7.73–7.69 (m, 1H), 7.63–7.59 (m, 2H), 7.42–7.39 (m, 1H), 7.24–7.17 (m, 2H), 5.29–5.25 (m, 1H), 3.81 (d,  $J = 2.1$  Hz, 1H), 3.50–3.31 (m, 2H).  $^{13}\text{C}$  NMR (100 MHz,  $\text{CDCl}_3$ )  $\delta$  142.8, 138.9, 134.3, 131.4, 130.3, 129.5, 128.8, 127.9, 124.3, 122.8, 67.8, 63.7.

(*S*)-1-(4-bromophenyl)-2-(phenylsulfonyl)ethan-1-ol **2h**

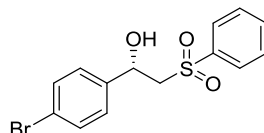

White solid, 99% yield, 67.6 mg; 94% ee;  $[\alpha]_{\text{D}}^{25} = +24.5$  ( $c = 1.50$ ,  $\text{CHCl}_3$ ). The enantiomeric excess was determined by HPLC on Chiracel OJ-H column, 220 nm, 20 °C, *n*-hexane: *i*-PrOH = 80:20; flow 1.0 mL/min;  $t_{\text{R}}$  (minor) = 39.7 min,  $t_{\text{R}}$  (major) = 54.8 min.  $^1\text{H}$  NMR (400 MHz,  $\text{CDCl}_3$ )  $\delta$  7.96–7.94 (m, 2H), 7.73–7.69 (m, 1H), 7.63–7.58 (m, 2H), 7.47–7.43 (m, 2H), 7.20–7.17 (m, 2H), 5.28–5.24 (m, 1H), 3.78 (d,  $J = 2.2$  Hz, 1H), 3.49–3.29 (m, 2H).  $^{13}\text{C}$  NMR (100 MHz,  $\text{CDCl}_3$ )  $\delta$  139.6, 138.9, 134.2, 131.9, 129.5, 127.9, 127.4, 122.2, 67.8, 63.7.

(*S*)-2-(phenylsulfonyl)-1-(*p*-tolyl)ethan-1-ol **2i**

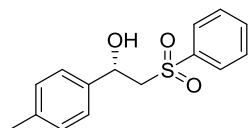

White solid, 99% yield, 54.7 mg; 96% ee;  $[\alpha]_{\text{D}}^{25} = +18.5$  ( $c = 1.50$ ,  $\text{CHCl}_3$ ). The enantiomeric excess was determined by HPLC on Chiracel OJ-H column, 220 nm, 20 °C,  $n$ -hexane:  $i$ -PrOH = 80:20; flow 1.0 mL/min;  $t_{\text{R}}$  (minor) = 23.6 min,  $t_{\text{R}}$  (major) = 28.2 min.  $^1\text{H}$  NMR (400 MHz,  $\text{CDCl}_3$ )  $\delta$  7.98–7.95 (m, 2H), 7.71–7.67 (m, 1H), 7.62–7.57 (m, 2H), 7.19–7.12 (m, 4H), 5.25–5.22 (m, 1H), 3.61 (d,  $J = 2.1$  Hz, 1H), 3.54–3.31 (m, 2H), 2.31 (s, 3H).  $^{13}\text{C}$  NMR (100 MHz,  $\text{CDCl}_3$ )  $\delta$  139.2, 138.2, 137.6, 134.1, 129.4, 129.4, 128.0, 125.6, 68.3, 63.9, 21.1.

**(S)-1-(4-chlorophenyl)-2-(phenylsulfonyl)ethan-1-ol 2j**

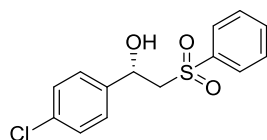

White solid, 98% yield, 58.5 mg; 94% ee;  $[\alpha]_{\text{D}}^{25} = +19.0$  ( $c = 1.50$ ,  $\text{CHCl}_3$ ). The enantiomeric excess was determined by HPLC on Chiracel OJ-H column, 220 nm, 20 °C,  $n$ -hexane:  $i$ -PrOH = 80:20; flow 1.0 mL/min;  $t_{\text{R}}$  (minor) = 32.8 min,  $t_{\text{R}}$  (major) = 42.9 min.  $^1\text{H}$  NMR (400 MHz,  $\text{CDCl}_3$ )  $\delta$  7.97–7.94 (m, 2H), 7.73–7.69 (m, 1H), 7.63–7.58 (m, 2H), 7.31–7.28 (m, 2H), 7.26–7.22 (m, 2H), 5.29–5.26 (m, 1H), 3.78 (d,  $J = 2.2$  Hz, 1H), 3.49–3.29 (m, 2H).  $^{13}\text{C}$  NMR (100 MHz,  $\text{CDCl}_3$ )  $\delta$  139.0, 138.9, 134.2, 134.1, 129.5, 128.9, 127.9, 127.0, 67.8, 63.8.

**(S)-2-(methylsulfonyl)-1-phenylethan-1-ol 2k**

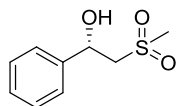

S/C = 500, 0.2 mmol substrate,  $\text{Na}_2\text{CO}_3$  (5 mol%). White solid, 99% yield, 39.6 mg; 97% ee;  $[\alpha]_{\text{D}}^{25} = +49.9$  ( $c = 1.50$ ,  $\text{CHCl}_3$ ). The enantiomeric excess was determined by HPLC on Chiracel OJ-H column, 210 nm, 20 °C,  $n$ -hexane:  $i$ -PrOH = 80:20; flow 1.0 mL/min;  $t_{\text{R}}$  (major) = 20.4 min,  $t_{\text{R}}$  (minor) = 30.9 min.  $^1\text{H}$  NMR (400 MHz,  $\text{CDCl}_3$ )

$\delta$  7.42–7.31 (m, 5H), 5.36–5.32 (m, 1H), 3.45 (dd,  $J = 14.7, 10.3$  Hz, 1H), 3.19–3.14 (m, 1H), 3.05 (s, 3H), 3.05–3.02 (m, 1H).  $^{13}\text{C}$  NMR (100 MHz,  $\text{CDCl}_3$ )  $\delta$  141.0, 129.0, 128.7, 125.6, 69.3, 62.4, 42.8.

**(S)-1-(2-fluorophenyl)-2-(methylsulfonyl)ethan-1-ol 2l**

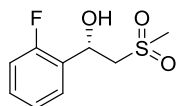

White solid, 99% yield, 43.2 mg; 95% ee;  $[\alpha]_{\text{D}}^{25} = +32.1$  ( $c = 1.50$ ,  $\text{CHCl}_3$ ). The enantiomeric excess was determined by HPLC on Chiracel OJ-H column, 220 nm, 20 °C,  $n$ -hexane:  $i$ -PrOH = 80:20; flow 1.0 mL/min;  $t_{\text{R}}$  (major) = 13.1 min,  $t_{\text{R}}$  (minor) = 17.6 min.  $^1\text{H}$  NMR (400 MHz,  $\text{CDCl}_3$ )  $\delta$  7.57–7.53 (m, 1H), 7.35–7.30 (m, 1H), 7.23–7.19 (m, 1H), 7.10–7.05 (m, 1H), 5.61–5.58 (m, 1H), 3.48–3.40 (m, 2H), 3.34–3.29 (m, 1H), 3.07 (s, 3H).  $^{13}\text{C}$  NMR (100 MHz,  $\text{CDCl}_3$ )  $\delta$  159.2 (d,  $J = 244.0$  Hz), 130.1 (d,  $J = 9.0$  Hz), 127.8 (d,  $J = 13.0$  Hz), 127.2 (d,  $J = 4.0$  Hz), 124.8 (d,  $J = 4.0$  Hz), 115.6 (d,  $J = 21.0$  Hz), 63.8 (d,  $J = 3.0$  Hz), 60.8 (d,  $J = 1.0$  Hz), 42.6

**(S)-1-(3-bromophenyl)-2-(methylsulfonyl)ethan-1-ol 2m**

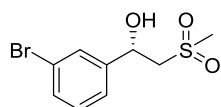

S/C = 500, 0.1 mmol substrate,  $\text{Na}_2\text{CO}_3$  (10 mol%). White solid, 99% yield, 27.6 mg; 97% ee;  $[\alpha]_{\text{D}}^{25} = +32.9$  ( $c = 1.50$ ,  $\text{CHCl}_3$ ). The enantiomeric excess was determined by HPLC on Chiracel OJ-H column, 210 nm, 20 °C,  $n$ -hexane:  $i$ -PrOH = 80:20; flow 1.0 mL/min;  $t_{\text{R}}$  (minor) = 32.3 min,  $t_{\text{R}}$  (major) = 34.2 min.  $^1\text{H}$  NMR (400 MHz,  $\text{CDCl}_3$ )  $\delta$  7.58 (t,  $J = 1.8$  Hz, 1H), 7.48–7.46 (m, 1H), 7.32–7.24 (m, 2H), 5.35–5.32 (m, 1H), 3.45–3.38 (m, 1H), 3.18–3.14 (m, 2H), 3.07 (s, 3H).  $^{13}\text{C}$  NMR (100 MHz,  $\text{CDCl}_3$ )  $\delta$  143.1, 131.7, 130.5, 128.8, 124.2, 123.1, 68.6, 62.2, 42.9.

**(S)-2-(methylsulfonyl)-1-(*p*-tolyl)ethan-1-ol 2n**

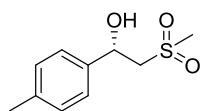

White solid, 98% yield, 50.0 mg; 98% ee;  $[\alpha]_{\text{D}}^{25} = +34.1$  ( $c = 1.50$ ,  $\text{CHCl}_3$ ). The enantiomeric excess was determined by HPLC on Chiracel OD-H column, 220 nm, 20 °C, *n*-hexane: *i*-PrOH = 80:20; flow 1.0 mL/min;  $t_{\text{R}}$  (major) = 11.4 min,  $t_{\text{R}}$  (minor) = 13.4 min.  $^1\text{H}$  NMR (400 MHz,  $\text{CDCl}_3$ )  $\delta$  7.28–7.26 (m, 2H), 7.20–7.18 (m, 2H), 5.32–5.28 (m, 1H), 3.48–3.42 (m, 1H), 3.17–3.12 (m, 1H), 3.04 (s, 3H), 2.94–2.93 (m, 1H), 2.35 (s, 3H).  $^{13}\text{C}$  NMR (100 MHz,  $\text{CDCl}_3$ )  $\delta$  138.5, 138.0, 129.6, 125.5, 69.2, 62.4, 42.8, 21.1.

**(S)-1-(4-chlorophenyl)-2-(methylsulfonyl)ethan-1-ol 2o**

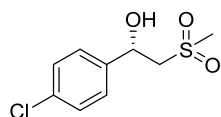

White solid, 99% yield, 46.5 mg; 99% ee;  $[\alpha]_{\text{D}}^{25} = +43.8$  ( $c = 1.50$ ,  $\text{CHCl}_3$ ). The enantiomeric excess was determined by HPLC on Chiracel OJ-H column, 220 nm, 20 °C, *n*-hexane: *i*-PrOH = 80:20; flow 1.0 mL/min;  $t_{\text{R}}$  (major) = 27.7 min,  $t_{\text{R}}$  (minor) = 31.9 min.  $^1\text{H}$  NMR (400 MHz,  $\text{CDCl}_3$ )  $\delta$  7.39–7.31 (m, 4H), 5.36–5.32 (m, 1H), 3.42 (dd,  $J = 14.7, 10.3$  Hz, 1H), 3.16–3.12 (m, 2H), 3.07 (s, 3H).  $^{13}\text{C}$  NMR (100 MHz,  $\text{CDCl}_3$ )  $\delta$  139.4, 134.4, 129.1, 127.0, 68.6, 62.3, 42.9.

**(S)-1-(4-methoxyphenyl)-2-(methylsulfonyl)ethan-1-ol 2p**

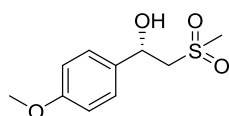

White solid, 99% yield, 45.6 mg; 99% ee;  $[\alpha]_{\text{D}}^{25} = +46.3$  ( $c = 1.50$ ,  $\text{CHCl}_3$ ). The enantiomeric excess was determined by HPLC on Chiracel OJ-H column, 220 nm, 20 °C, *n*-hexane: *i*-PrOH = 80:20; flow 1.0 mL/min;  $t_{\text{R}}$  (major) = 42.2 min,  $t_{\text{R}}$  (minor) = 60.0 min.  $^1\text{H}$  NMR (400 MHz,  $\text{CDCl}_3$ )  $\delta$  7.32–7.28 (m, 2H), 6.93–6.89 (m, 2H), 5.30–5.27 (m, 1H), 3.81 (s, 3H), 3.49–3.42 (m, 1H), 3.14 (dd,  $J = 14.7, 2.0$  Hz, 1H), 3.04 (s, 3H), 2.96–2.95 (m, 1H).  $^{13}\text{C}$  NMR (100 MHz,  $\text{CDCl}_3$ )  $\delta$  159.8, 133.1, 127.0, 114.3,

68.9, 62.4, 55.3, 42.8.

(*S*)-1-(furan-2-yl)-2-(phenylsulfonyl)ethanol **2q**

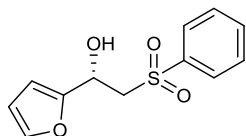

S/C = 500, 0.2 mmol substrate, Na<sub>2</sub>CO<sub>3</sub> (5 mol%). White solid, 98% yield, 49.4 mg; 86% ee; [ $\alpha$ ]<sub>D</sub><sup>25</sup> = +8.0 (c = 1.50, CHCl<sub>3</sub>). The enantiomeric excess was determined by HPLC on Chiracel OJ-H column, 220 nm, 20 °C, *n*-hexane: *i*-PrOH = 80:20; flow 1.0 mL/min; t<sub>R</sub> (major) = 38.1 min, t<sub>R</sub> (minor) = 36.0 min. <sup>1</sup>H NMR (400 MHz, CDCl<sub>3</sub>)  $\delta$  7.96-7.93 (m, 2H), 7.71-7.66 (m, 1H), 7.61-7.56 (m, 2H), 7.30 (dd, *J* = 1.7, 1.0 Hz, 1H), 6.31-6.29 (m, 2H), 5.30-5.26 (m, 1H), 3.68 (dd, *J* = 14.4, 9.4 Hz, 1H), 3.56-3.49 (m, 2H). <sup>13</sup>C NMR (100 MHz, CDCl<sub>3</sub>)  $\delta$  152.4, 142.6, 139.0, 134.1, 129.4, 128.0, 110.4, 107.4, 62.7, 60.5.

(*S*)-1-cyclohexyl-2-(phenylsulfonyl)ethan-1-ol **2r**

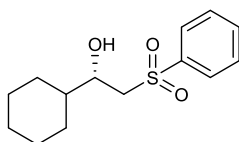

S/C = 500, 0.2 mmol substrate, Na<sub>2</sub>CO<sub>3</sub> (5 mol%). Colorless liquid, 35% yield, 18.9 mg; 90% ee; [ $\alpha$ ]<sub>D</sub><sup>25</sup> = +10.6 (c = 1.50, CHCl<sub>3</sub>). The enantiomeric excess was determined by HPLC on Chirapak AD-H column, 220 nm, 20 °C, *n*-hexane: *i*-PrOH = 80:20; flow 0.7 mL/min; t<sub>R</sub> (minor) = 18.9 min, t<sub>R</sub> (major) = 22.1 min. <sup>1</sup>H NMR (400 MHz, CDCl<sub>3</sub>)  $\delta$  7.94 (dd, *J* = 8.3, 1.3 Hz, 2H), 7.69-7.67 (m, 1H), 7.62-7.58 (m, 2H), 3.96-3.95 (m, 1H), 3.26 (d, *J* = 2.6 Hz, 1H), 3.26-3.22 (m, 2H), 1.74-1.63 (m, 5H), 1.46-1.36 (m, 1H), 1.27-0.99 (m, 5H). <sup>13</sup>C NMR (100 MHz, CDCl<sub>3</sub>)  $\delta$  139.2, 134.0, 129.4, 127.9, 69.7, 60.2, 43.1, 28.4, 27.5, 26.2, 25.9, 25.8.

## 4. NMR spectra

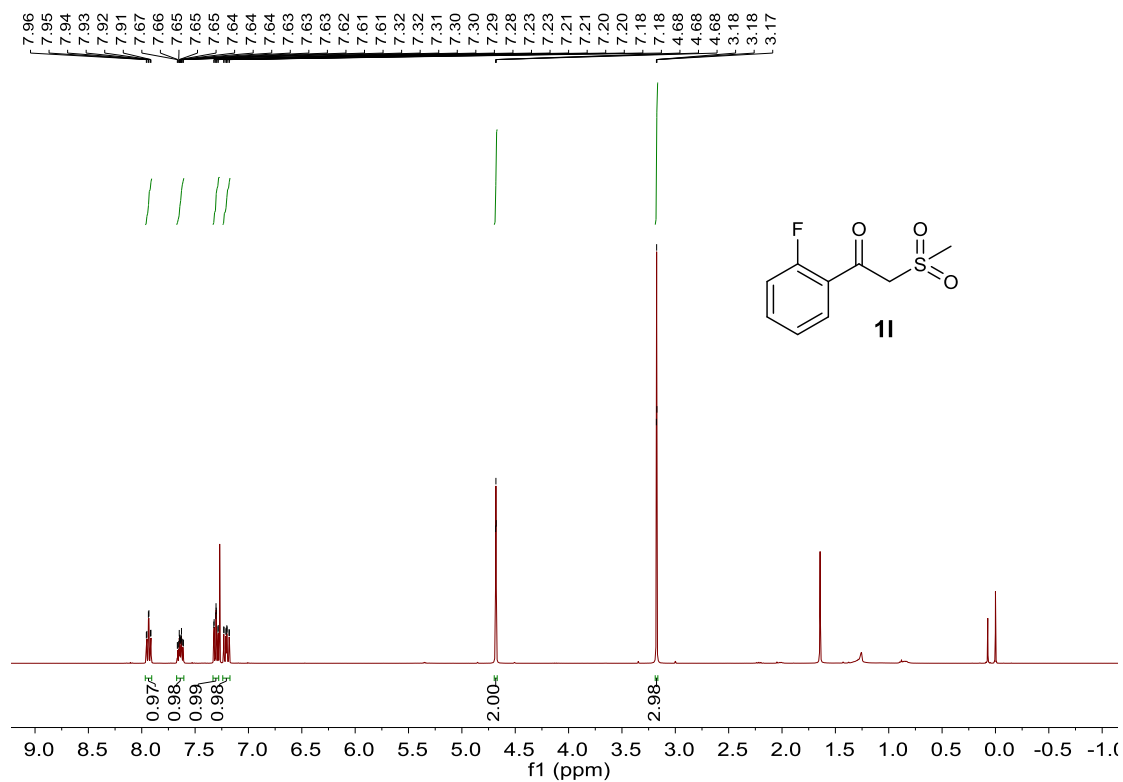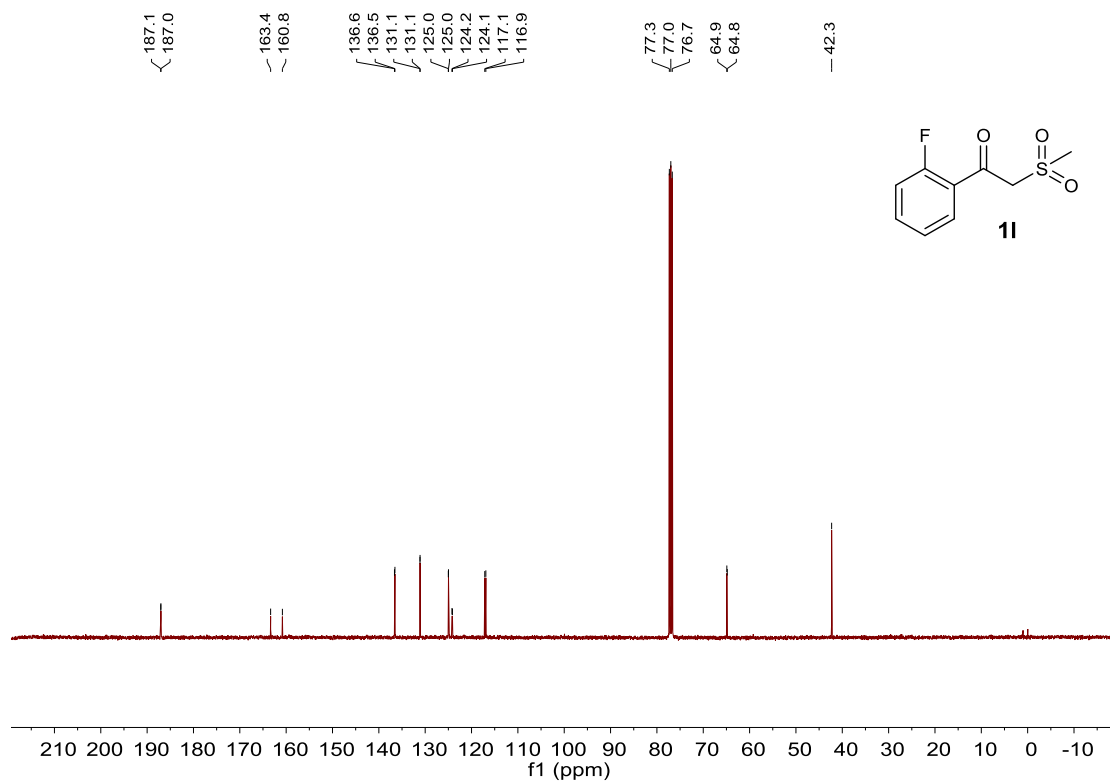



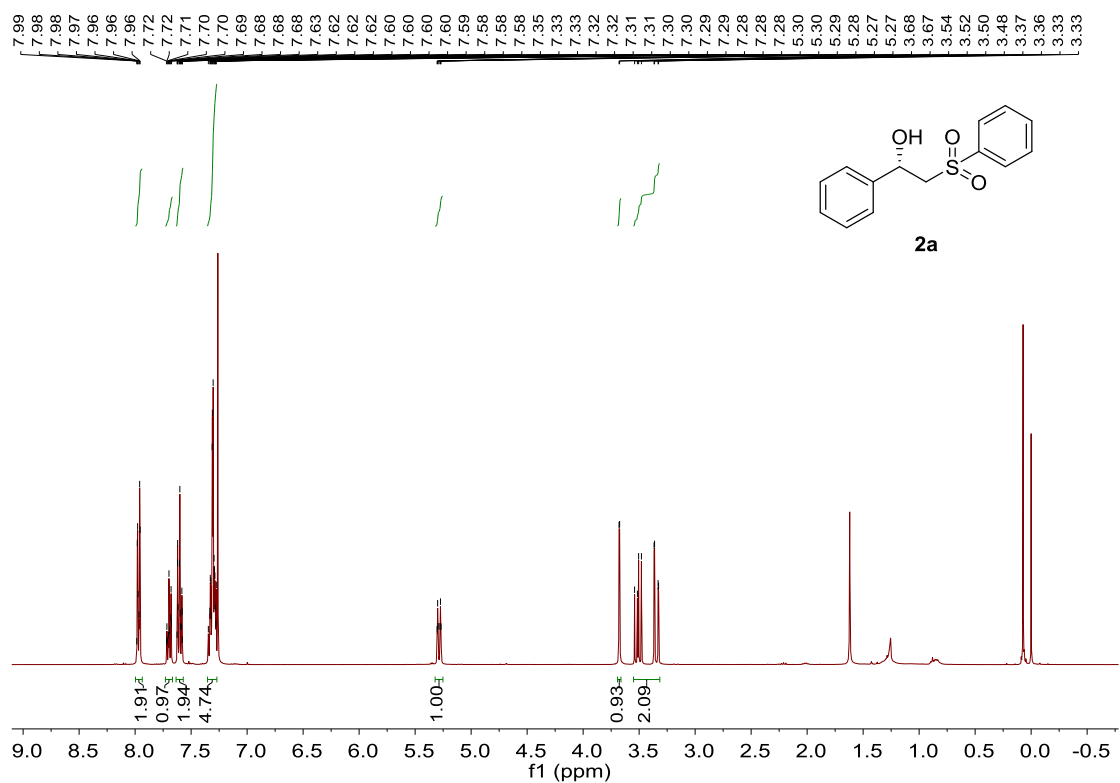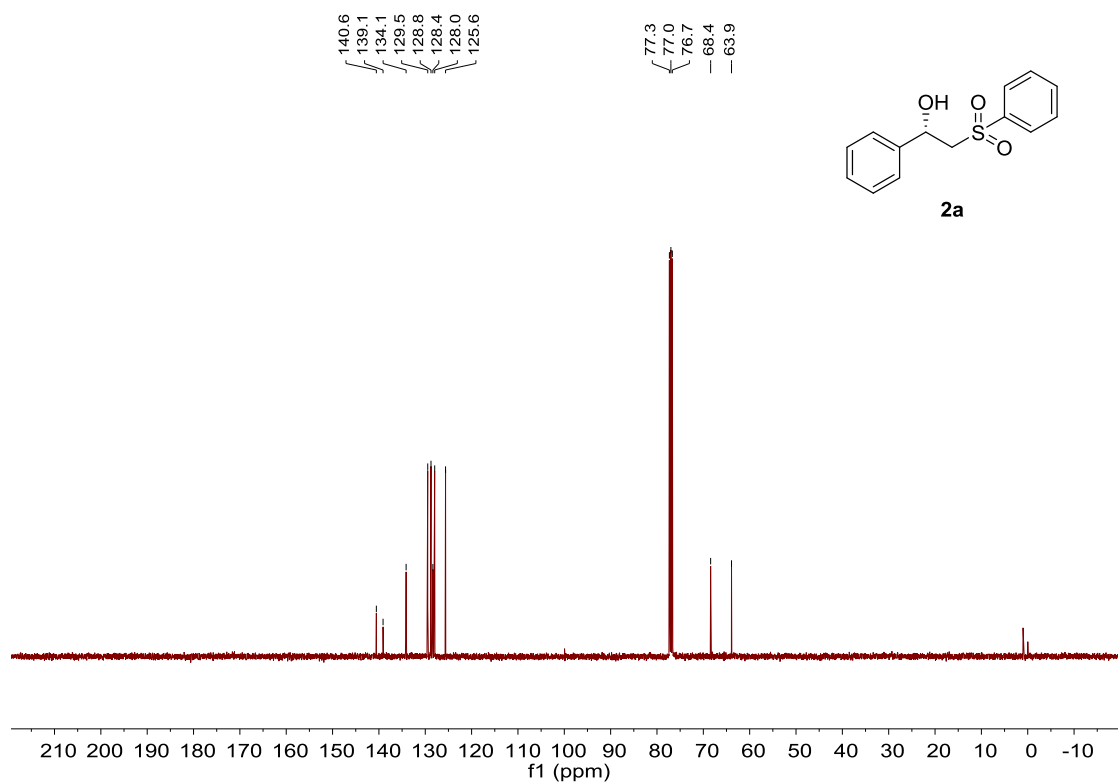

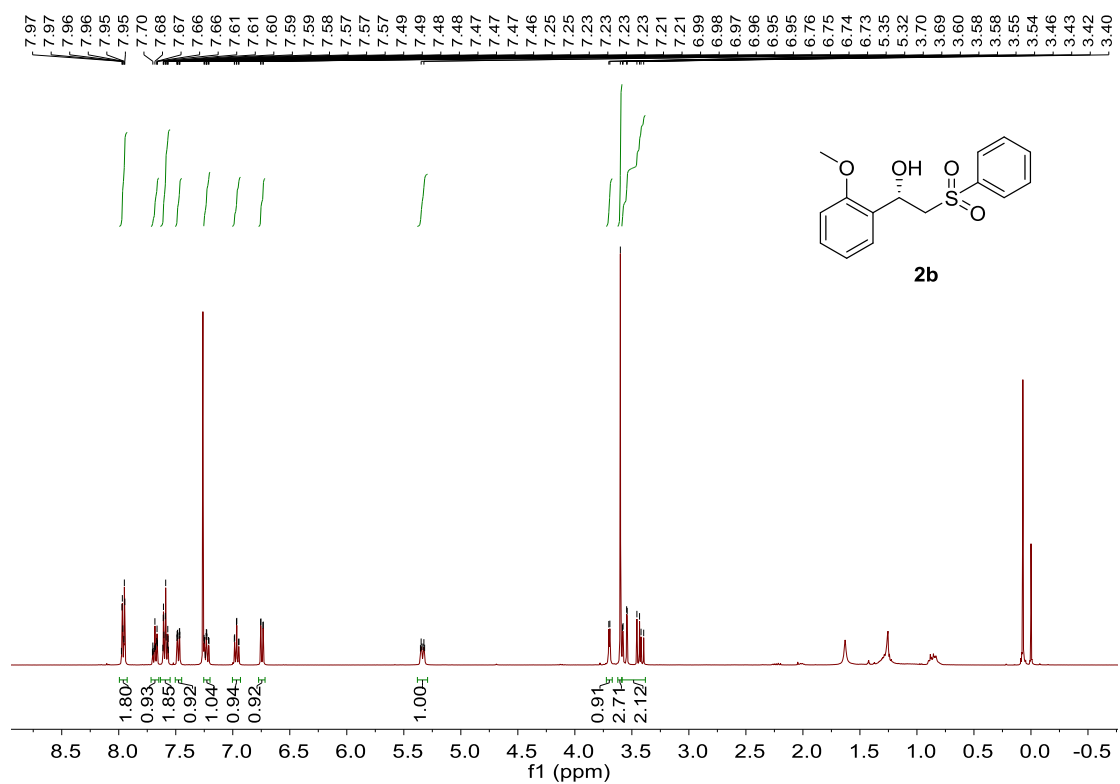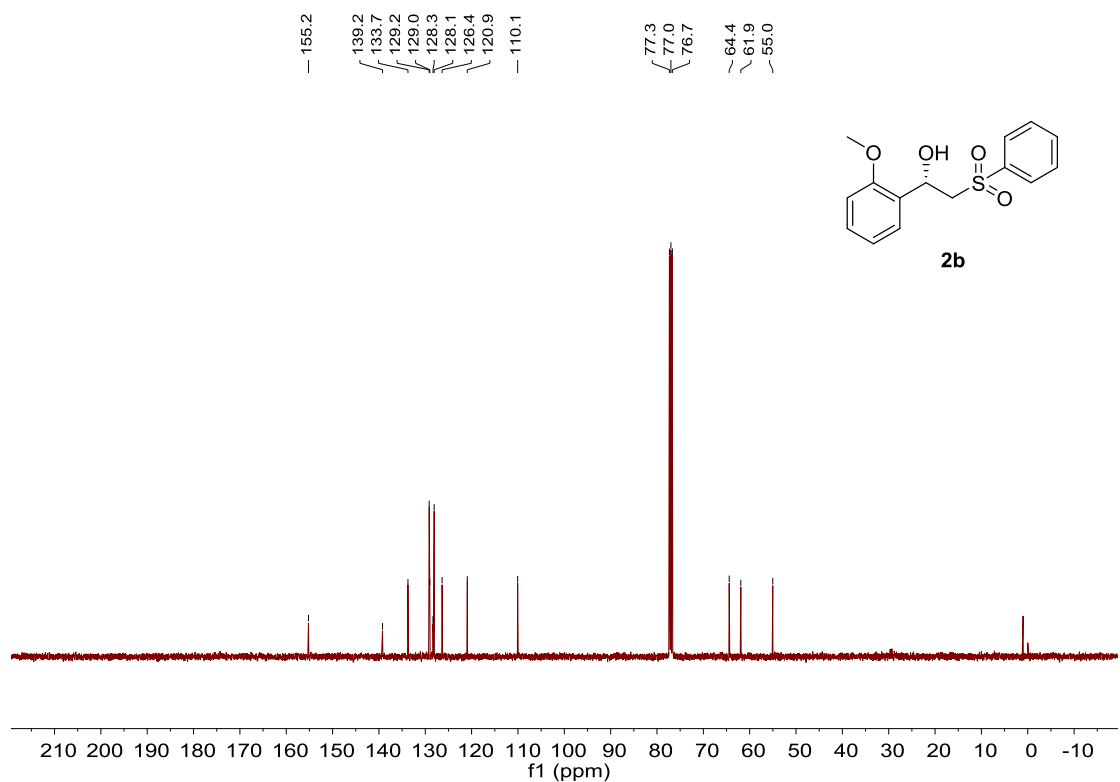

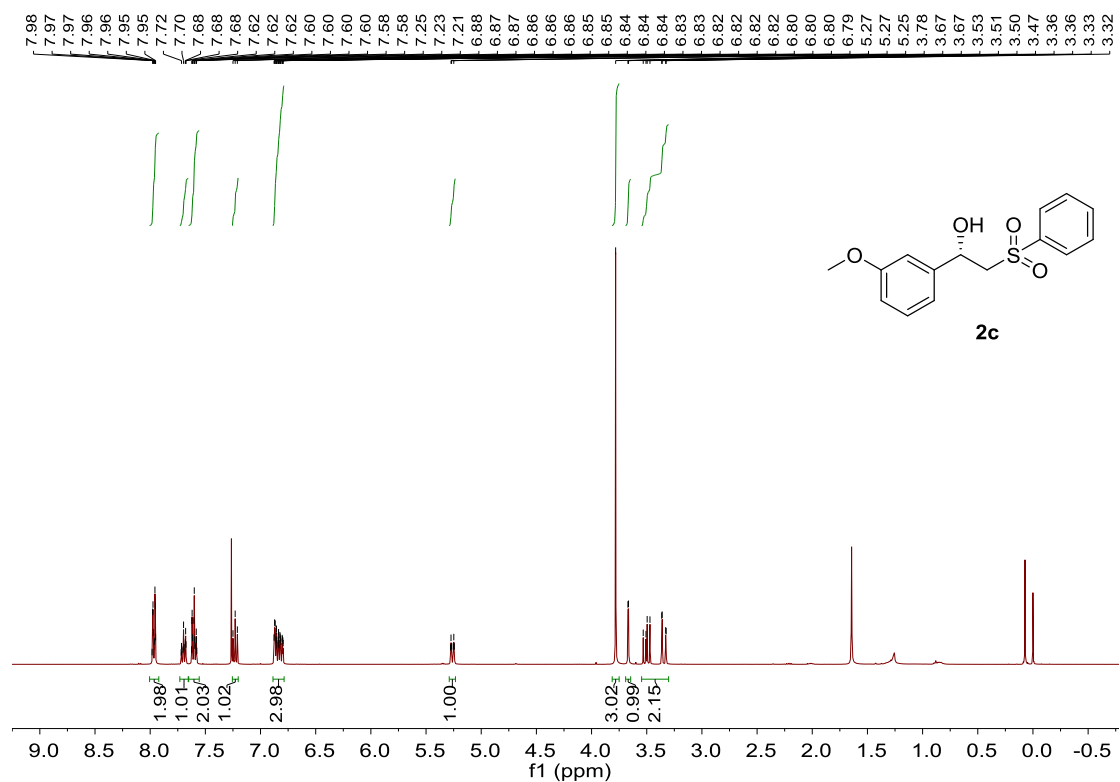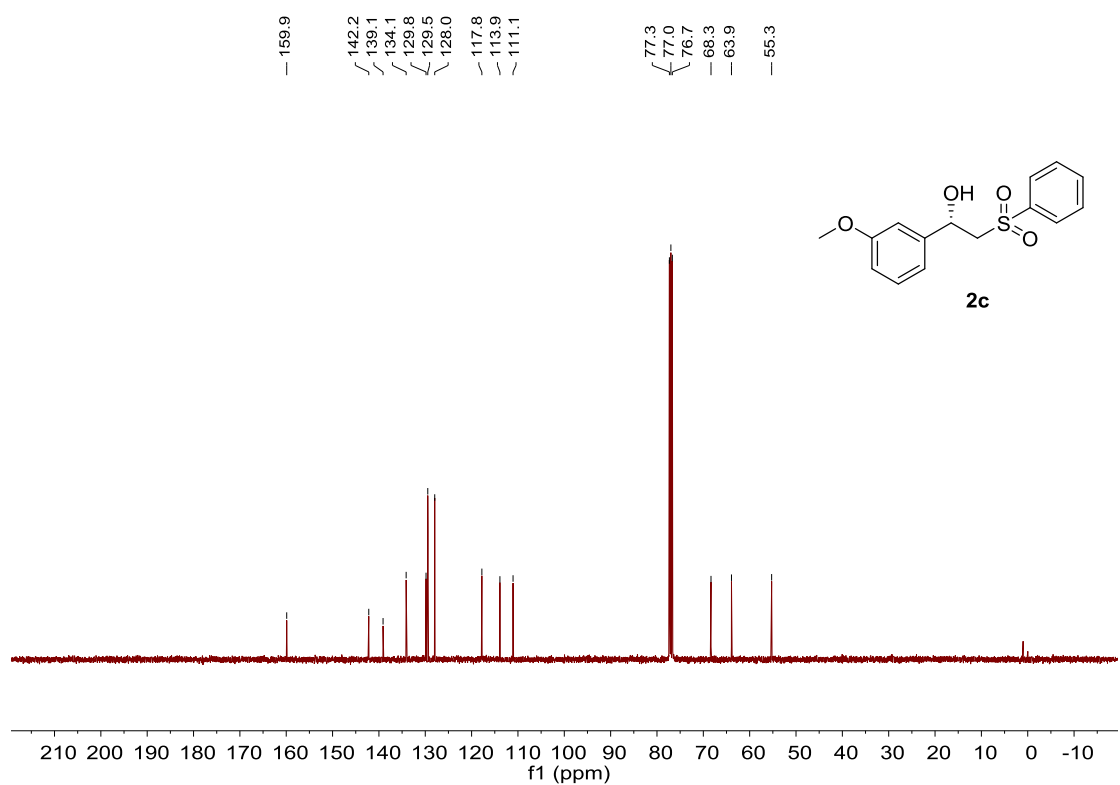

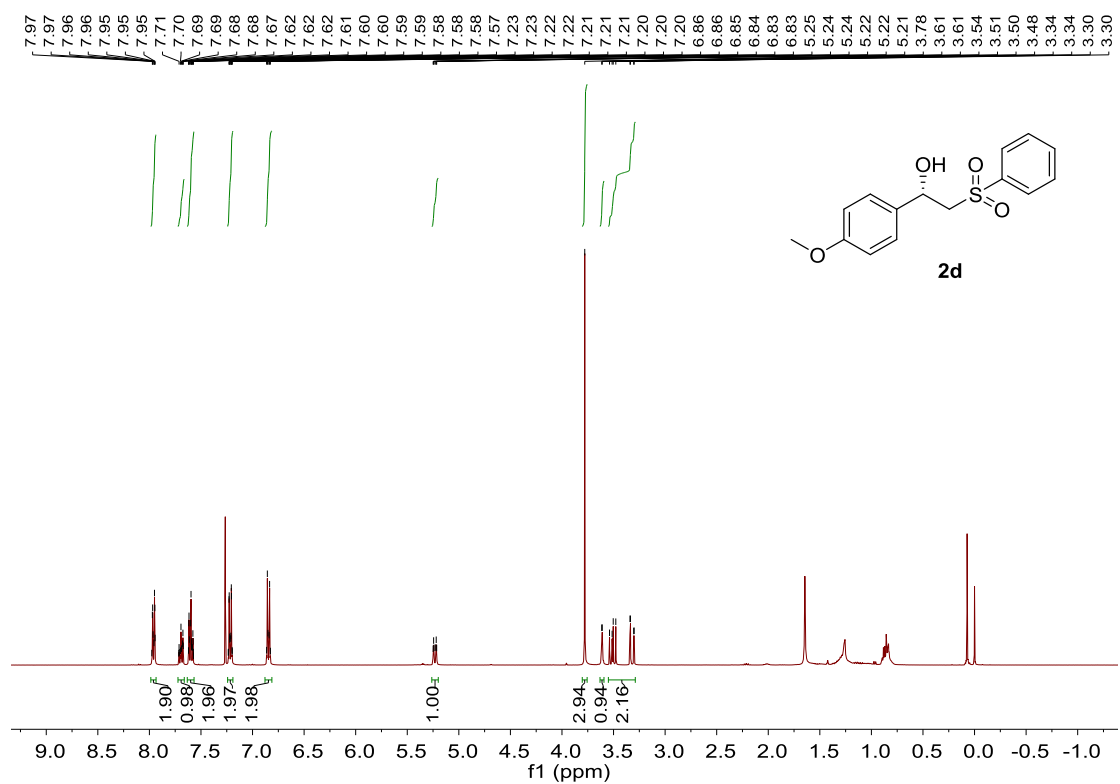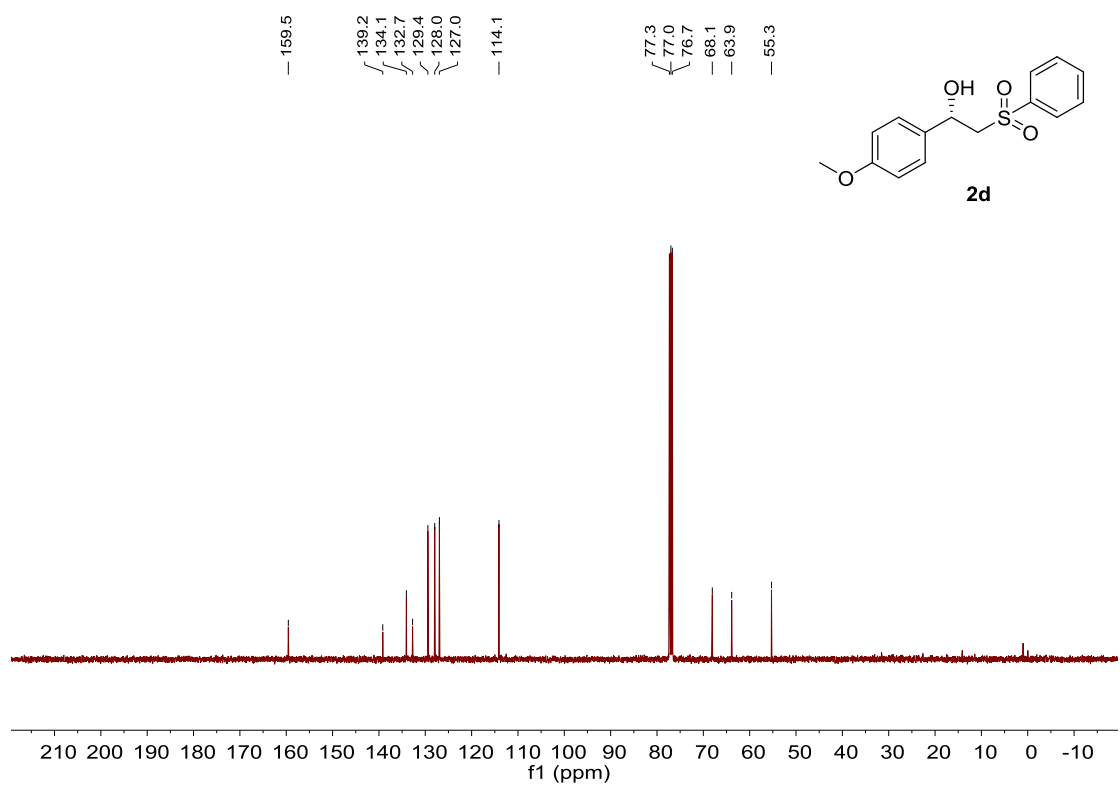

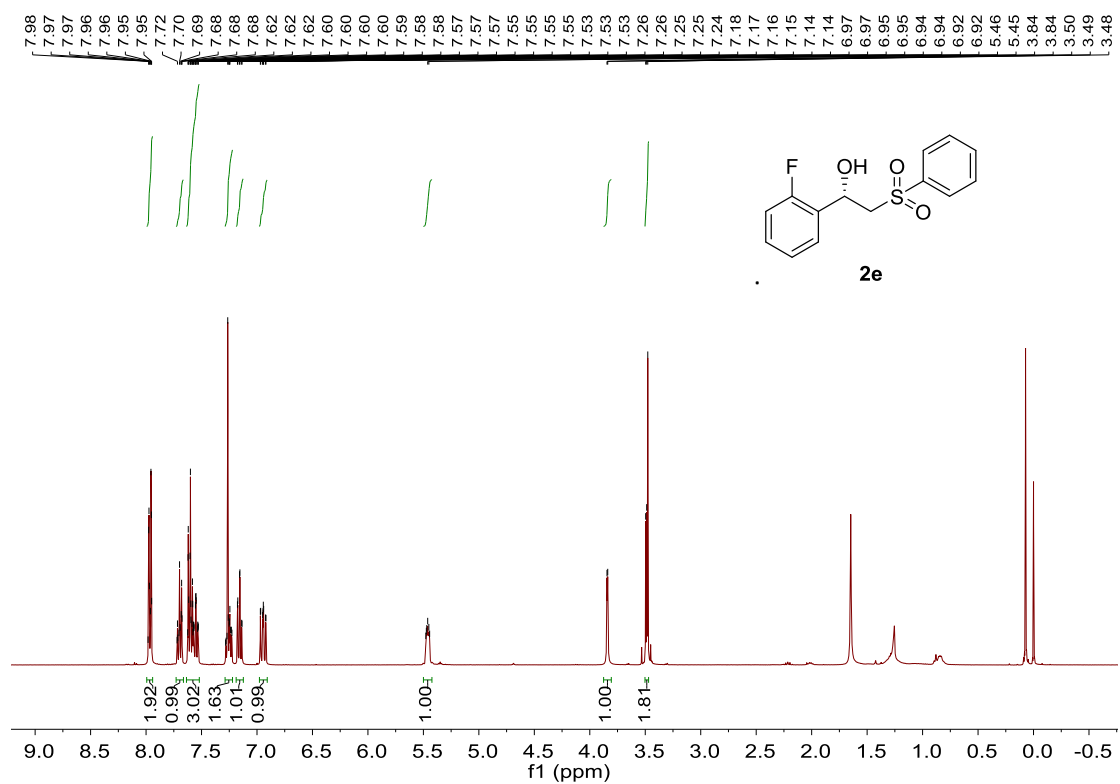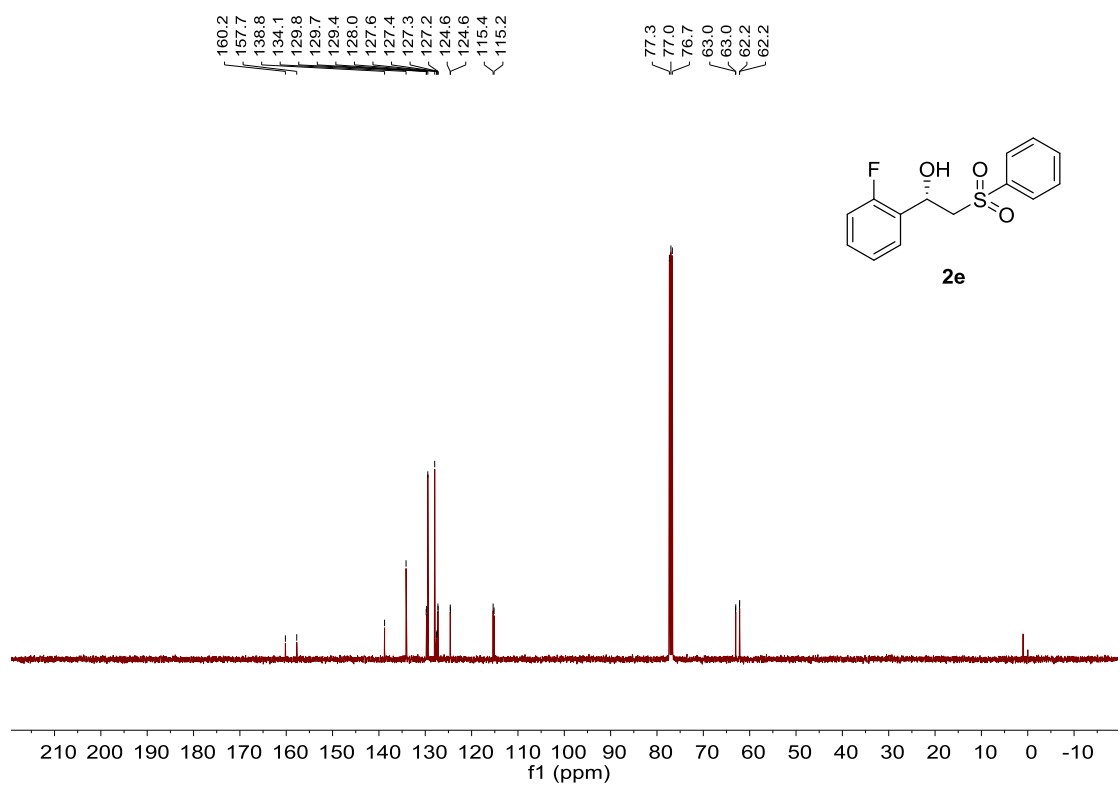

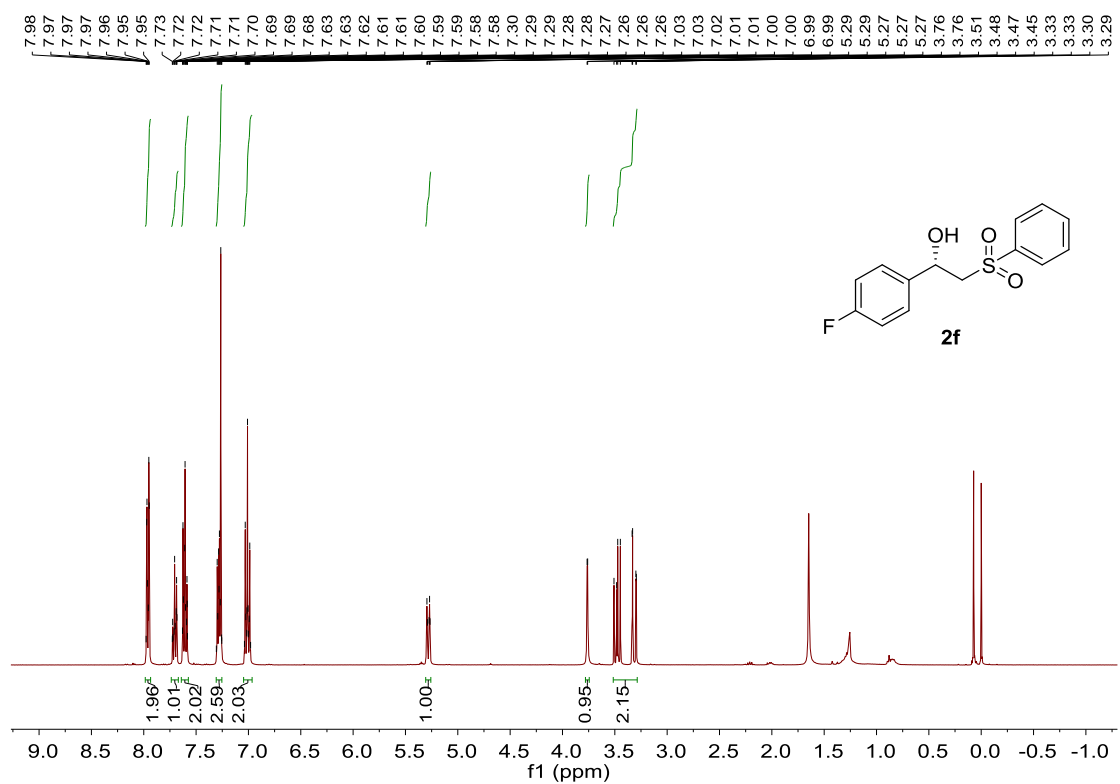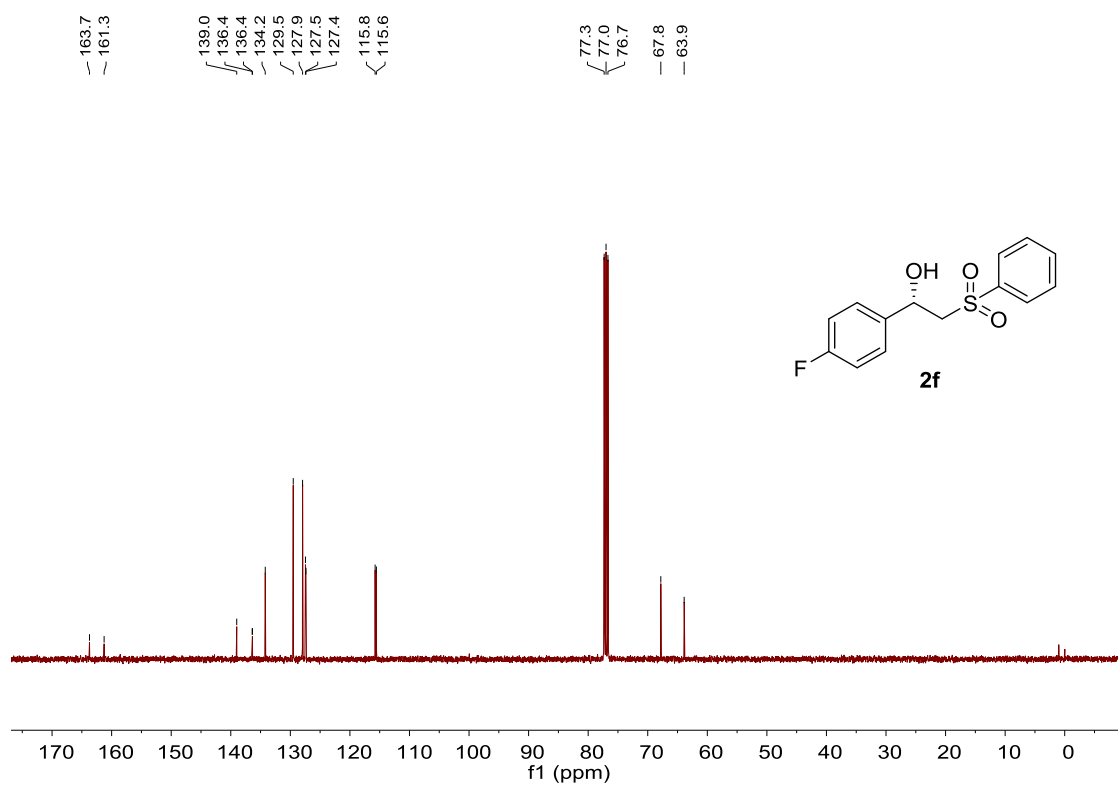

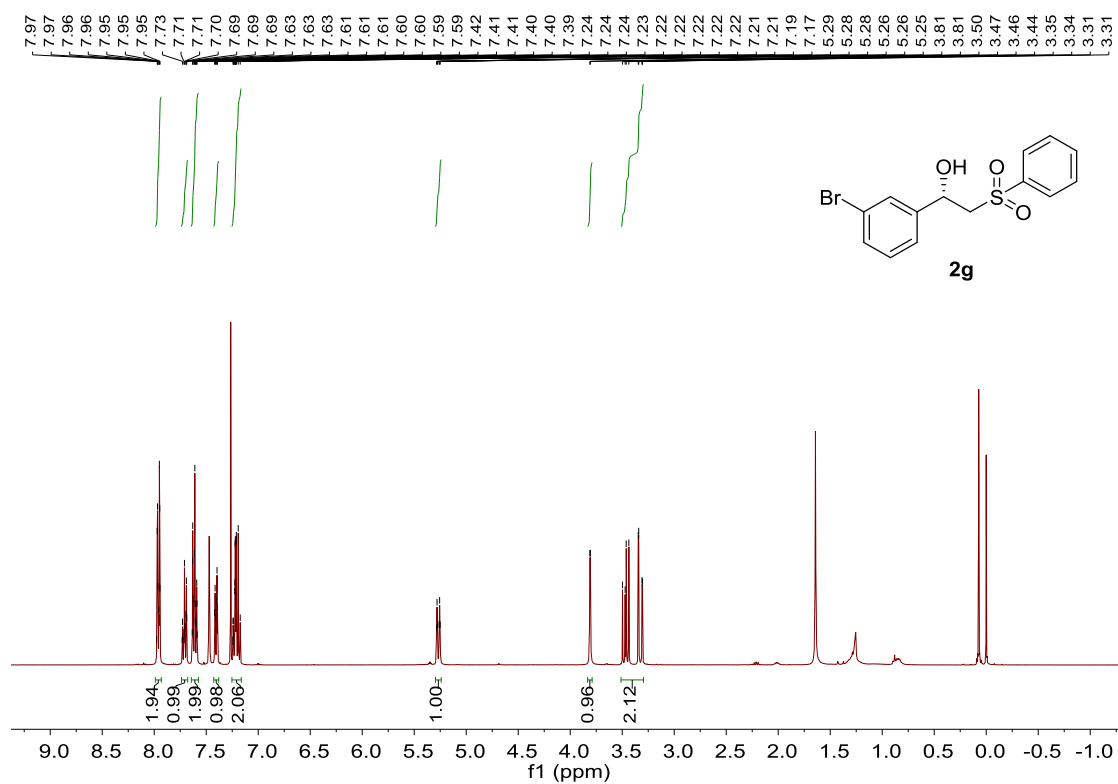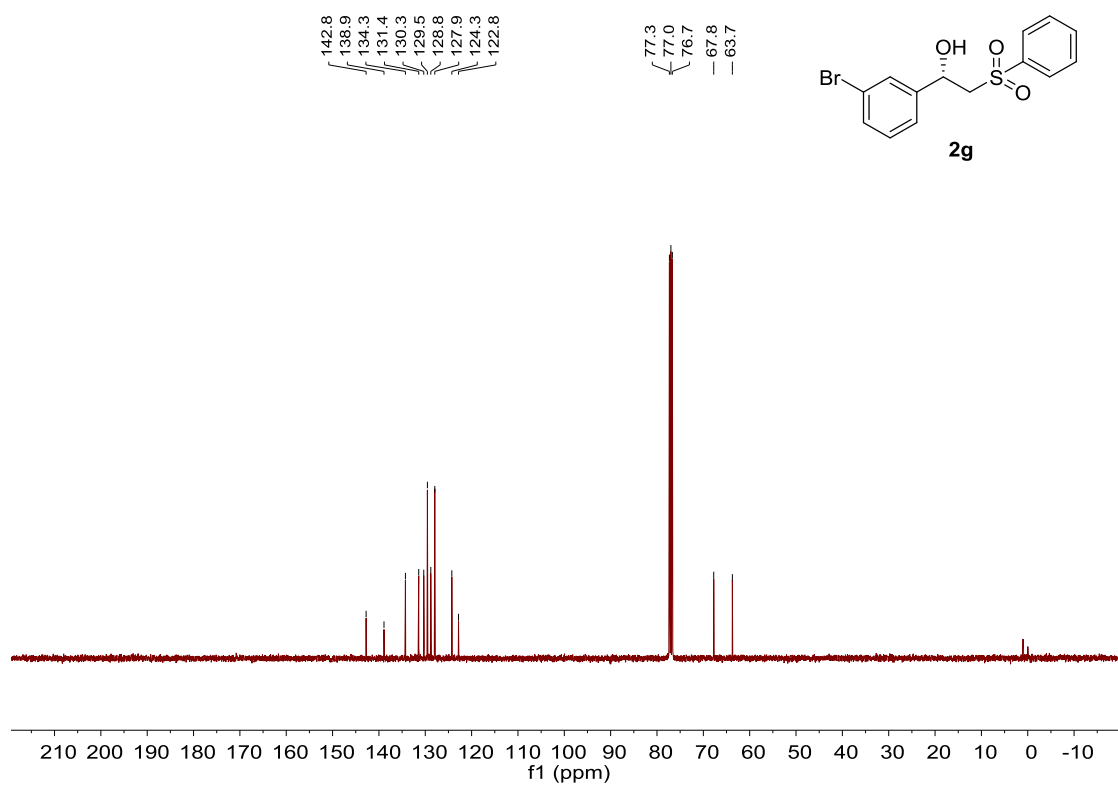

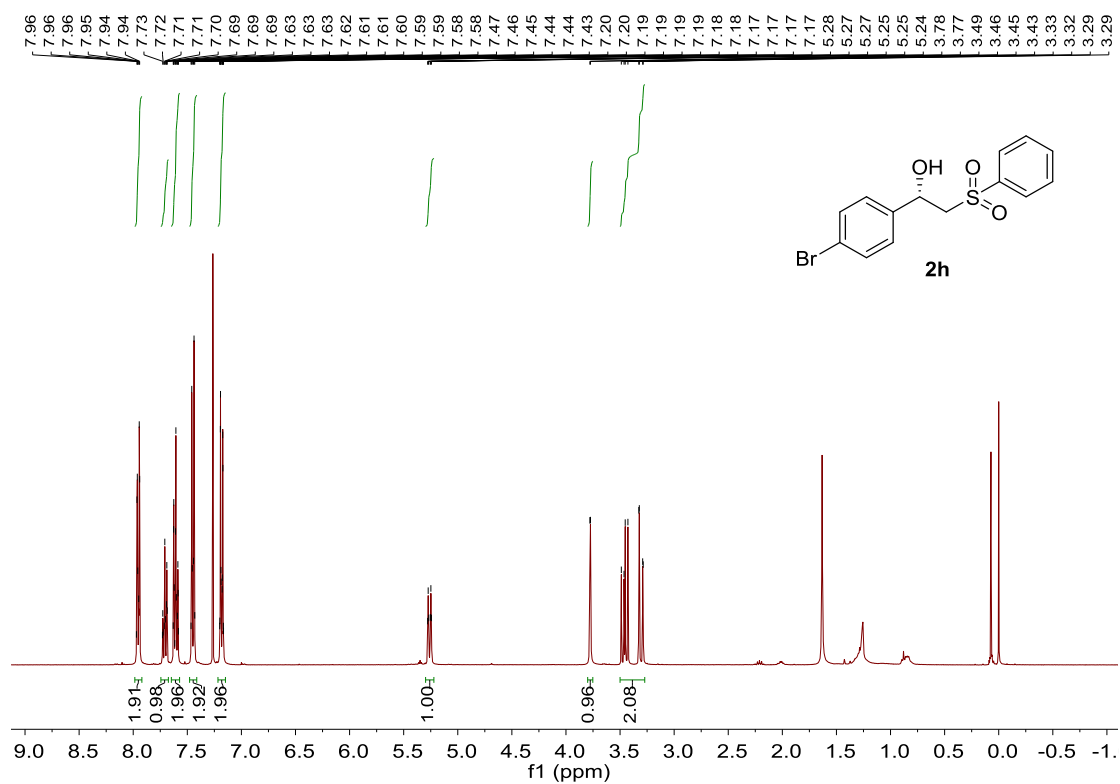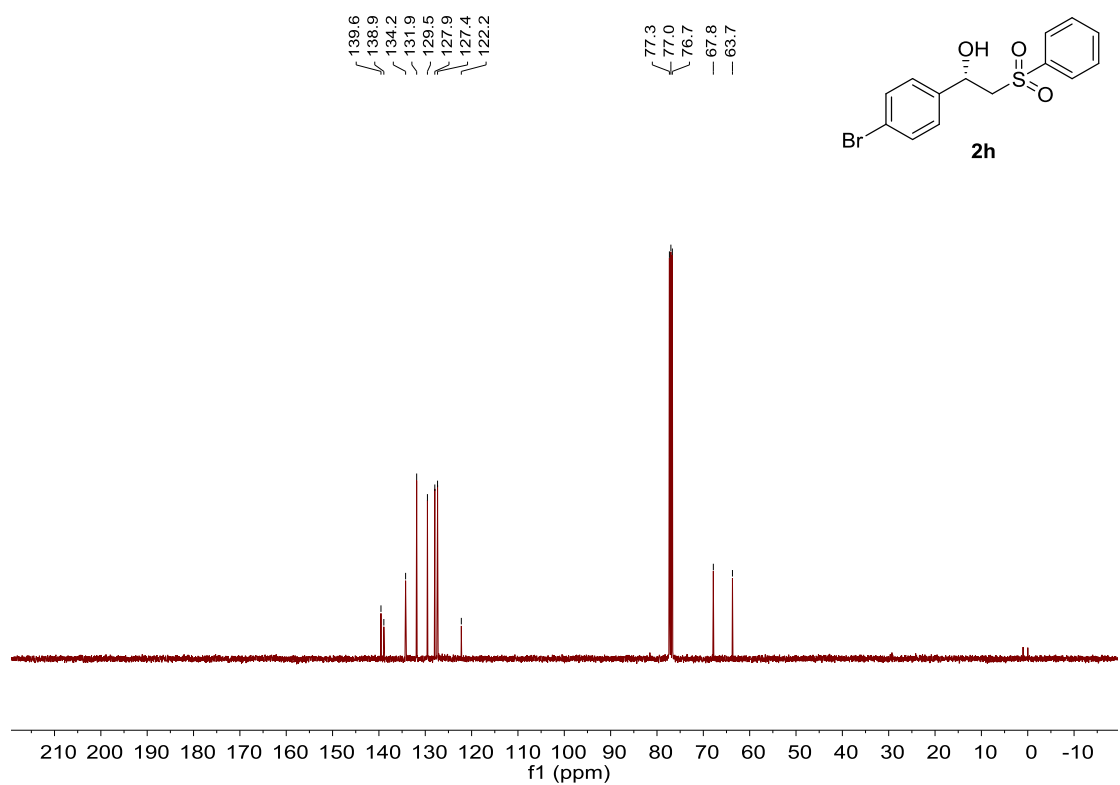



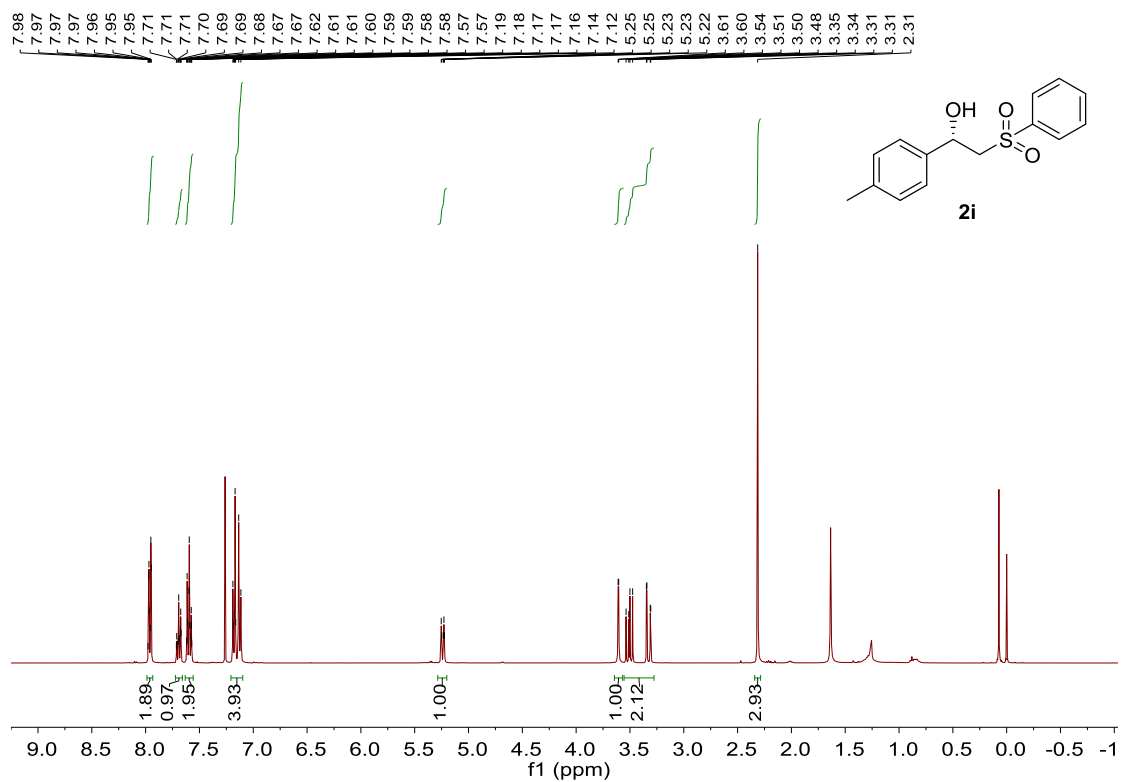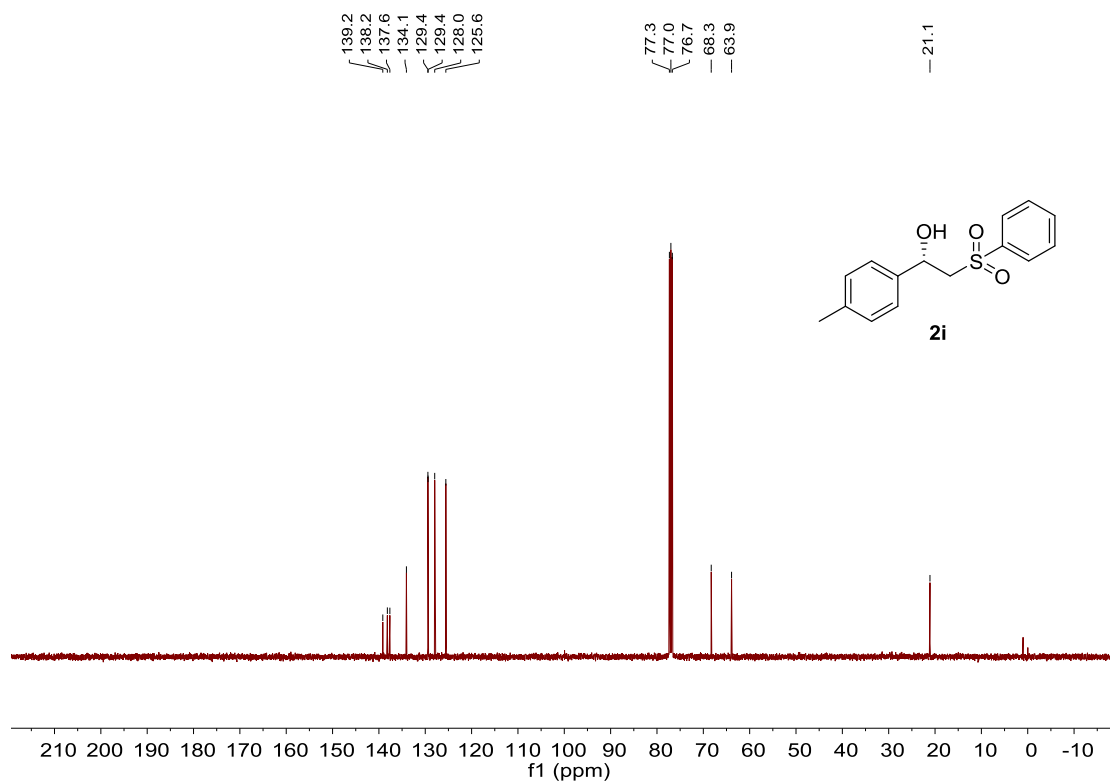

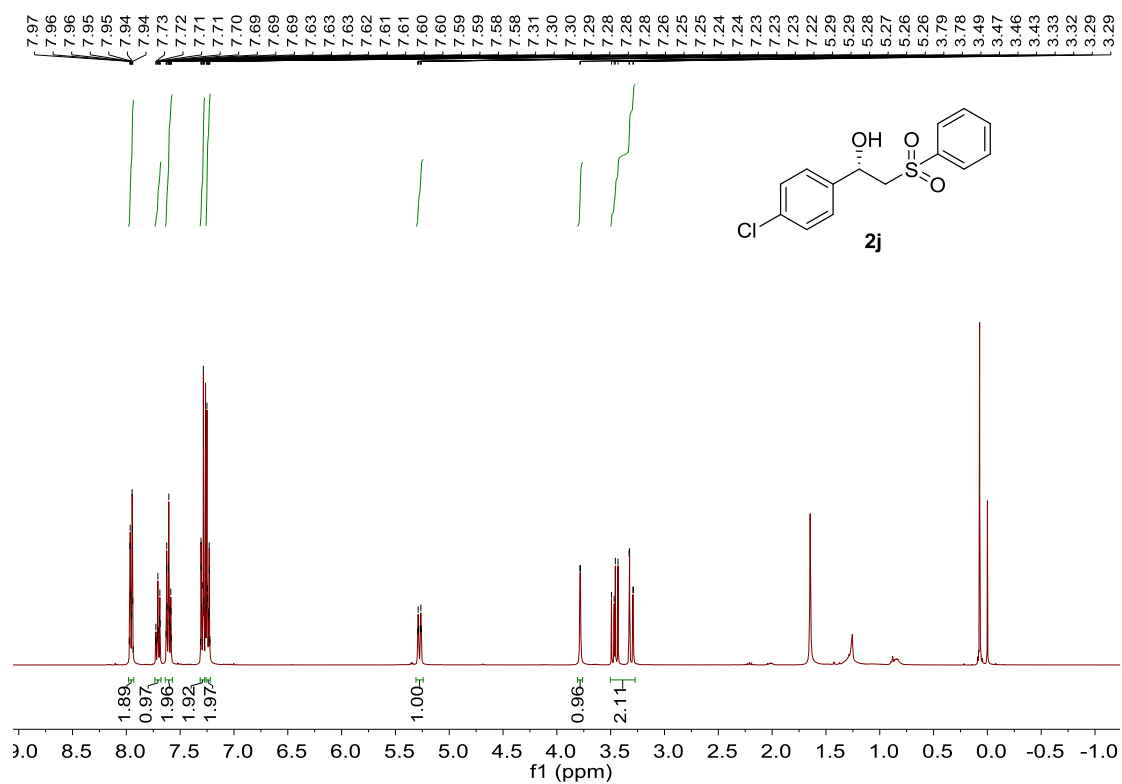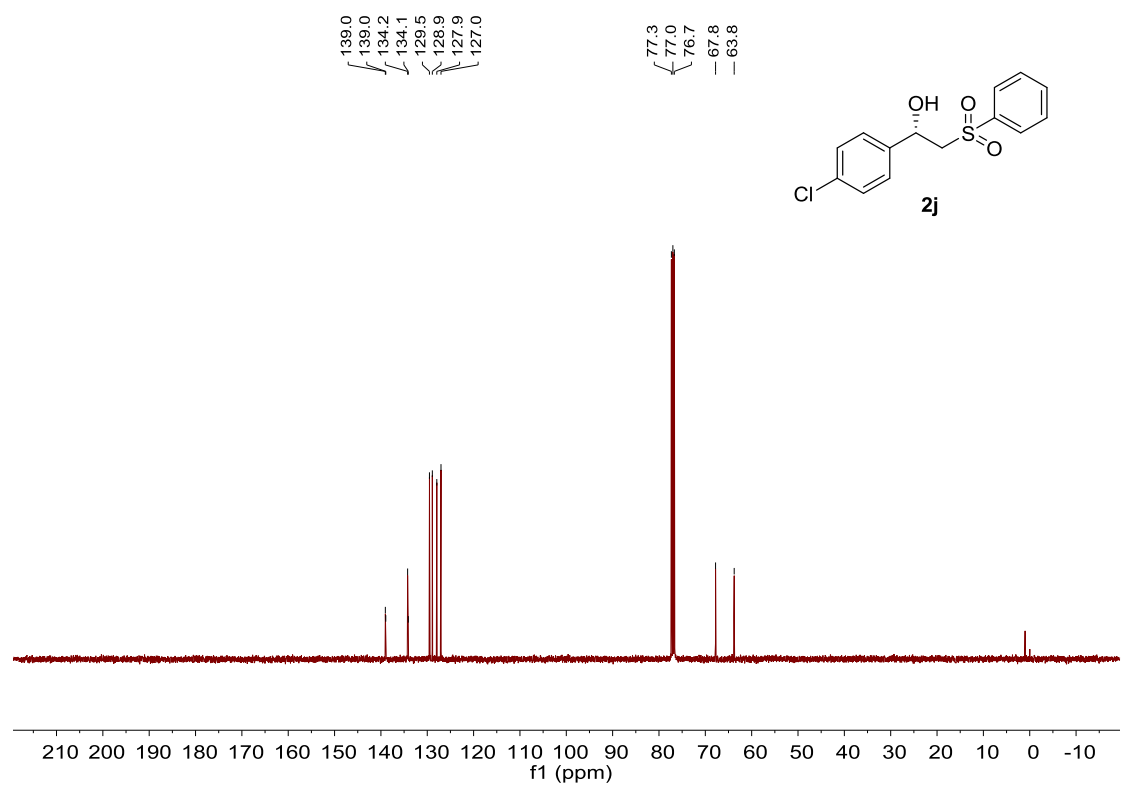

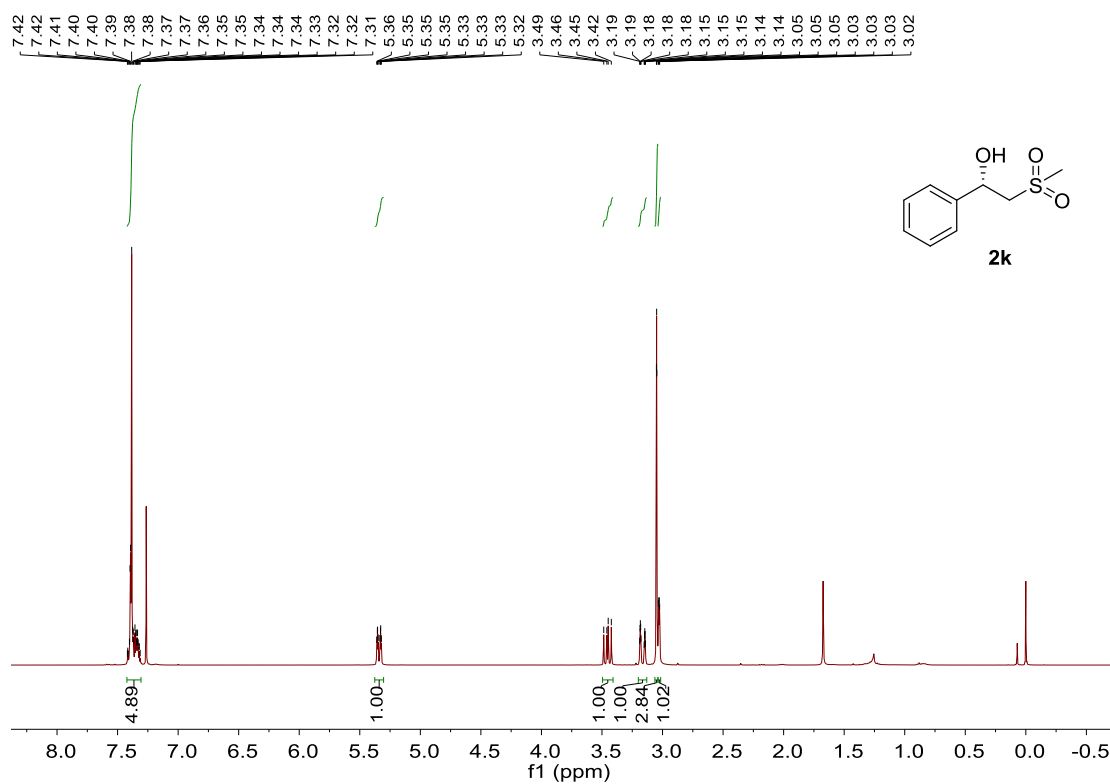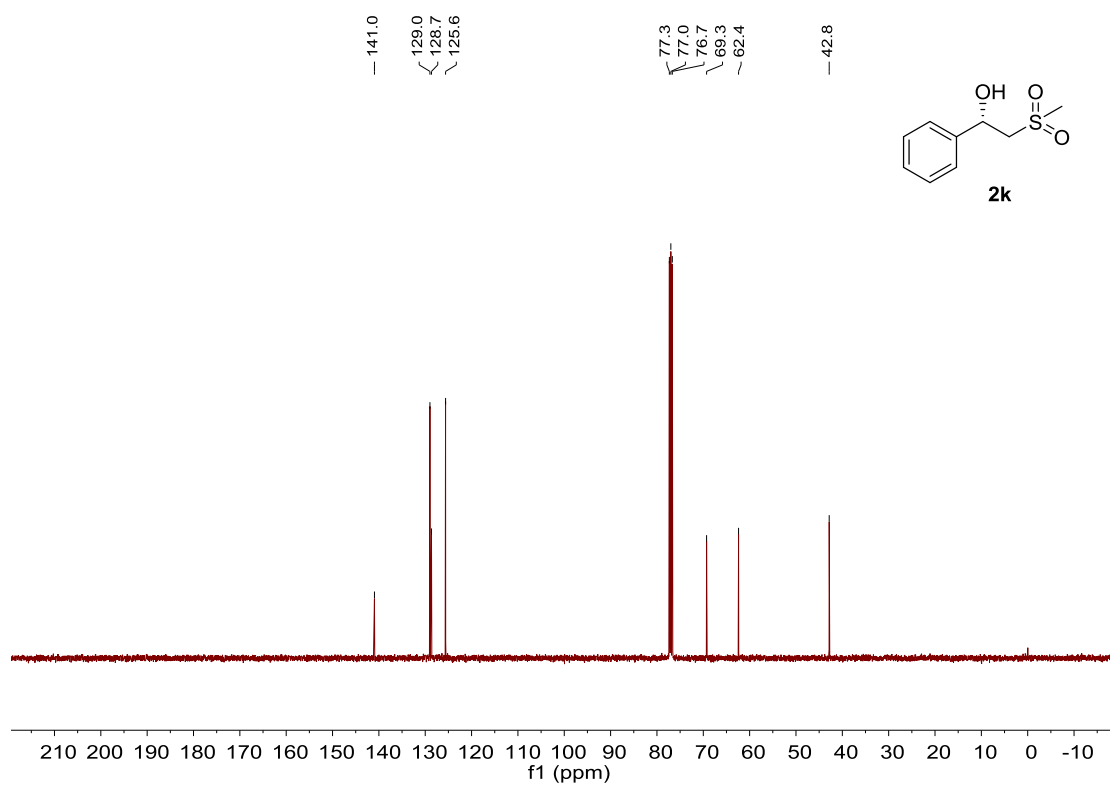

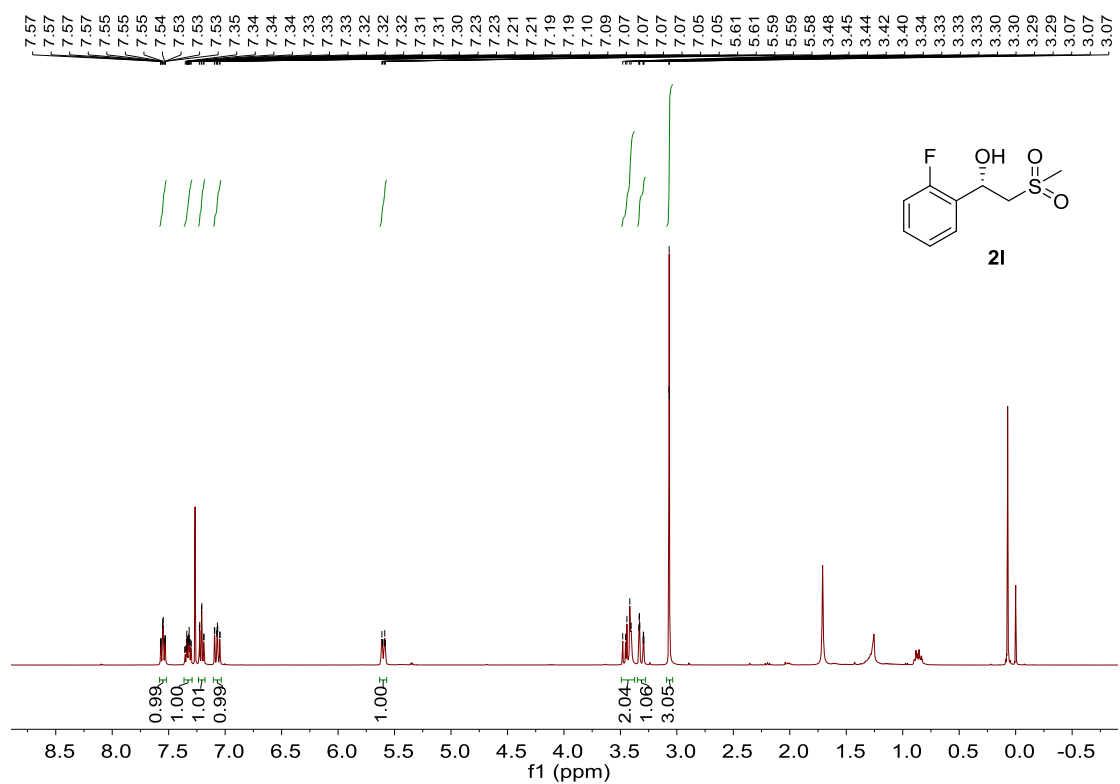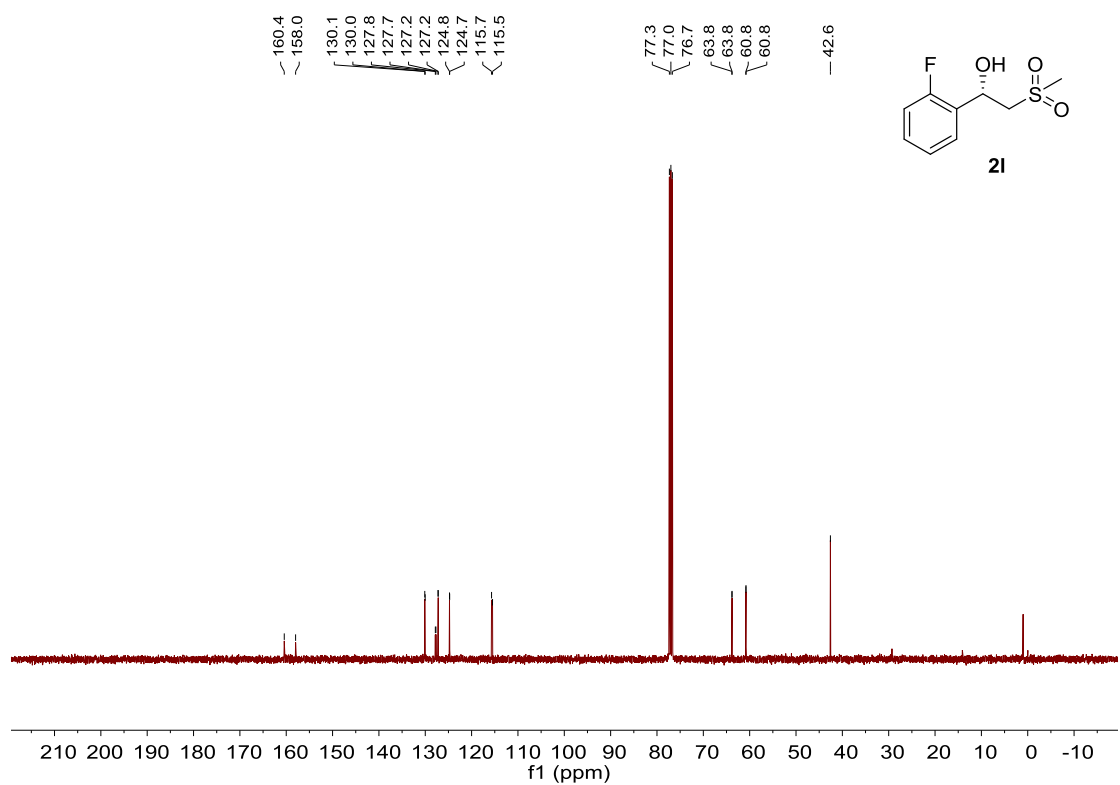

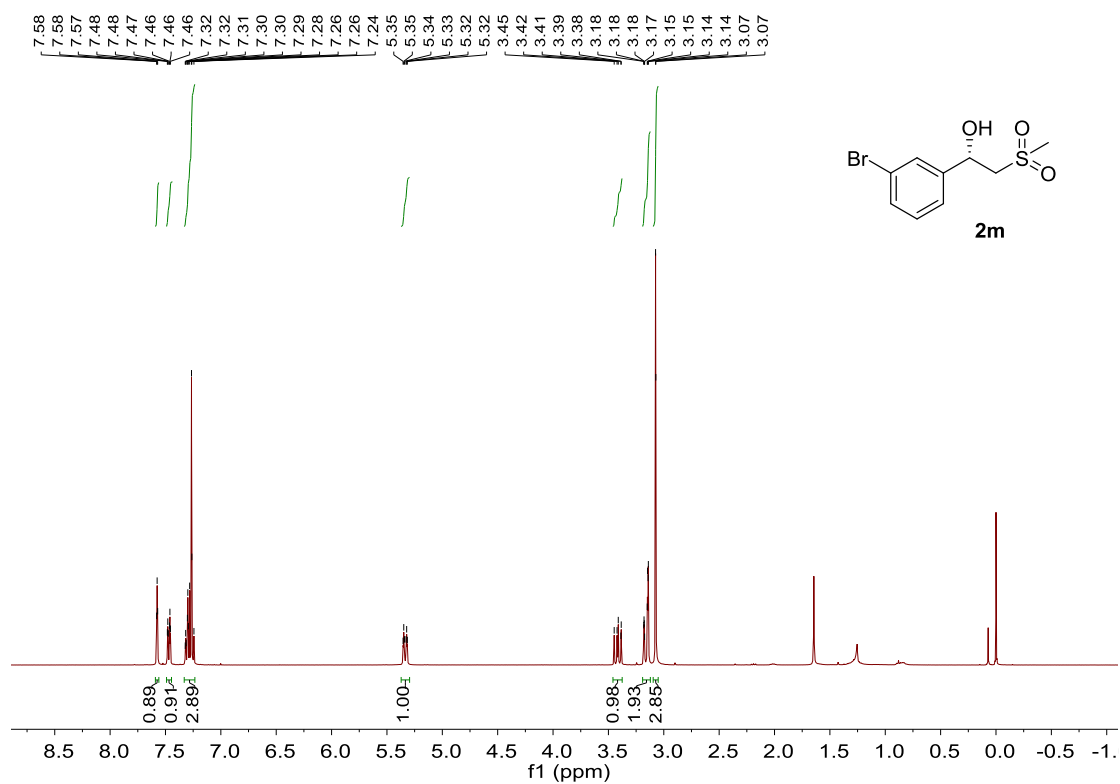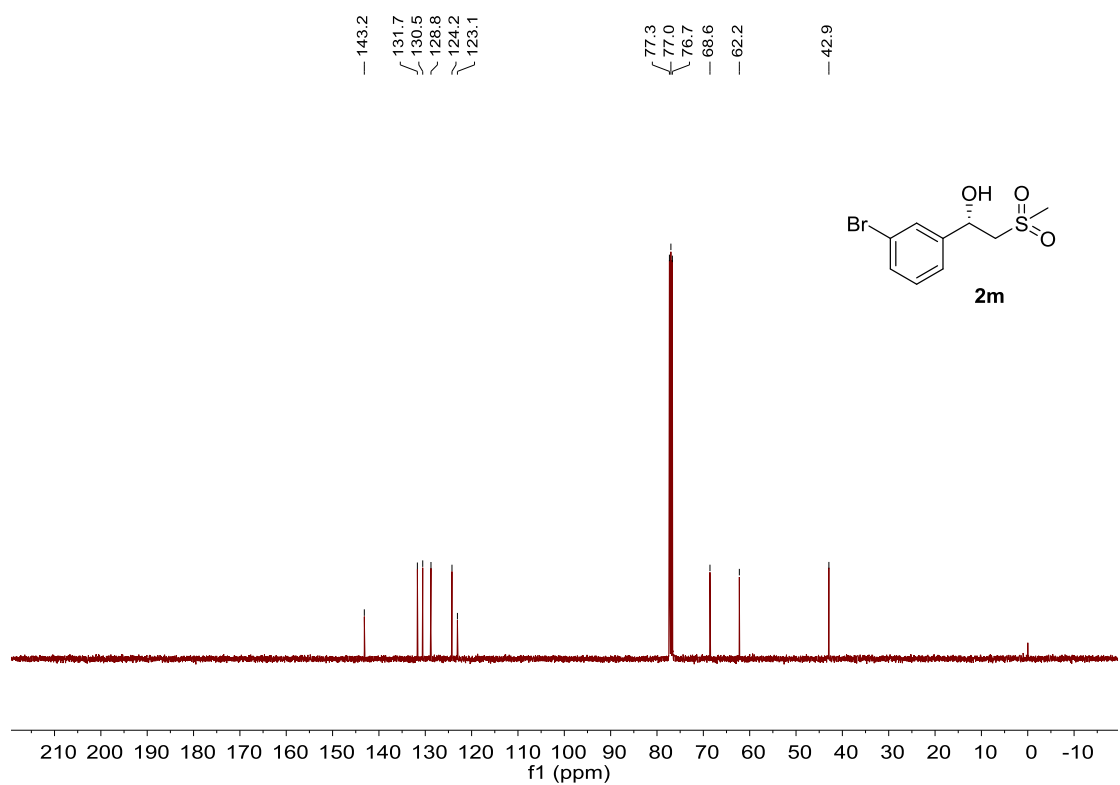

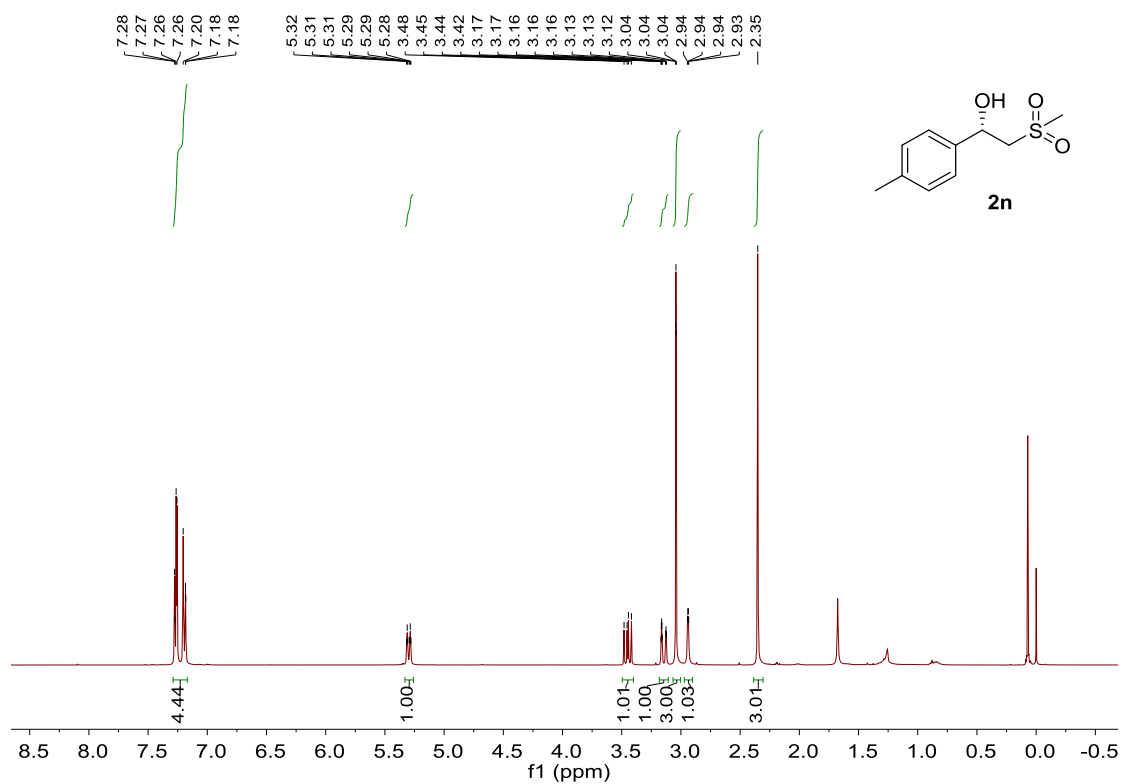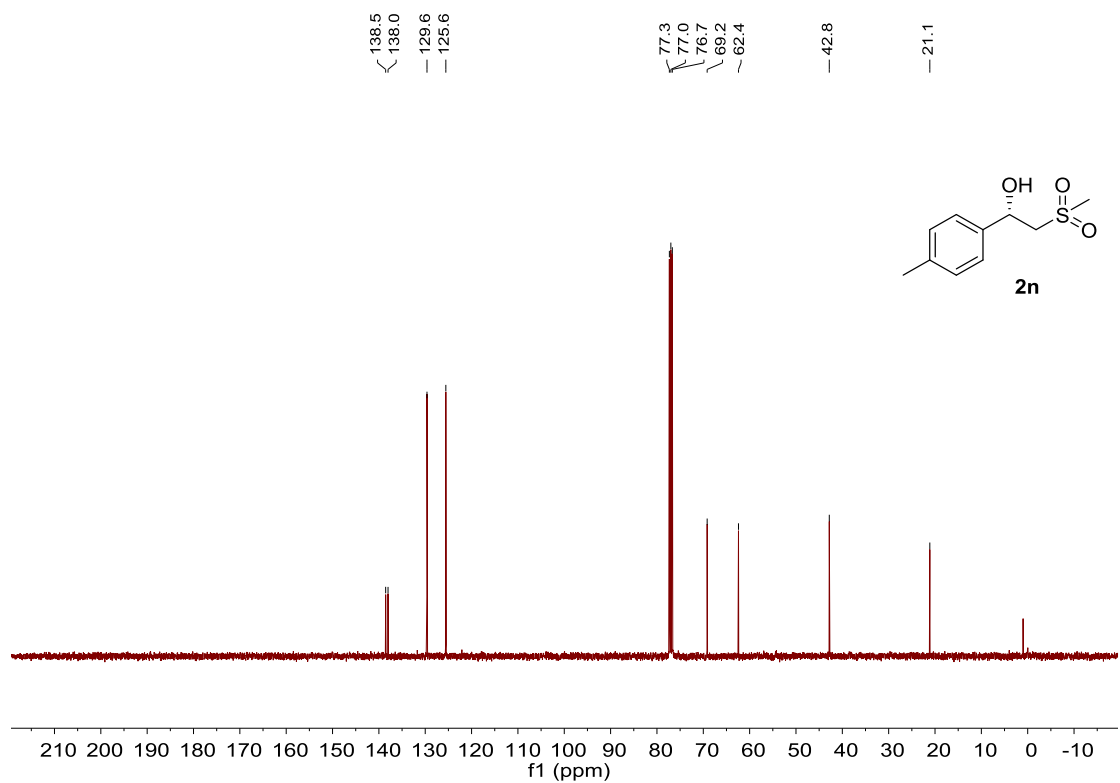

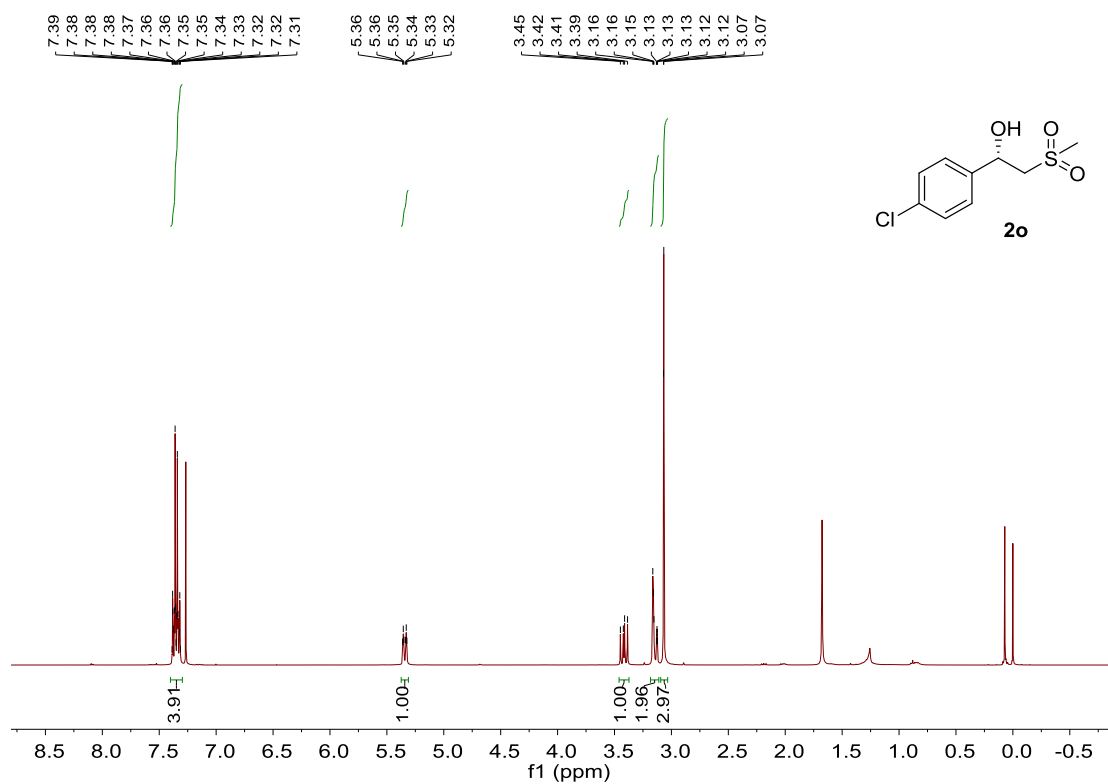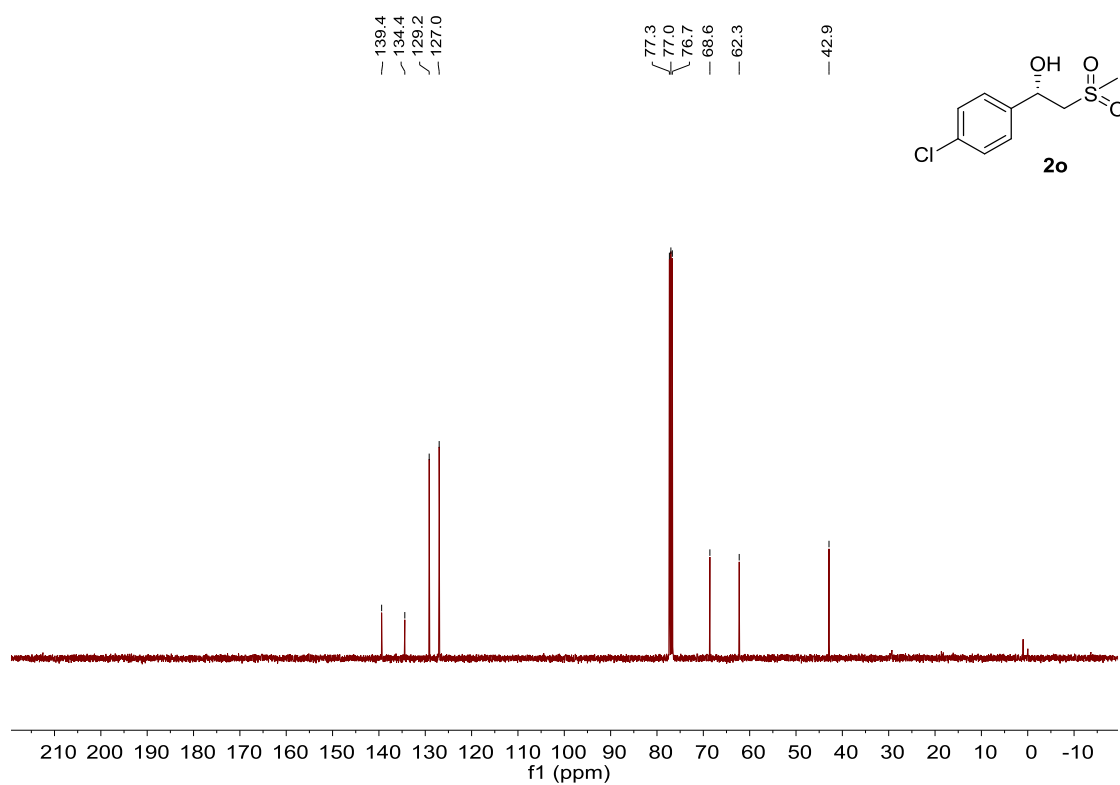

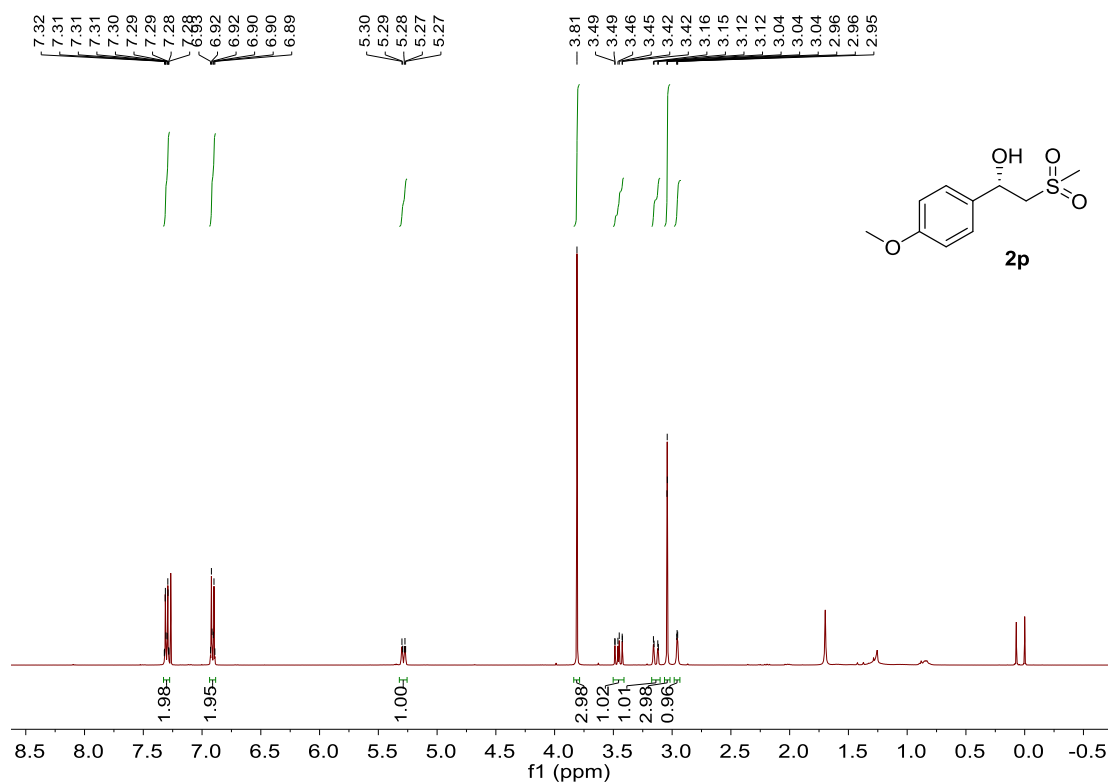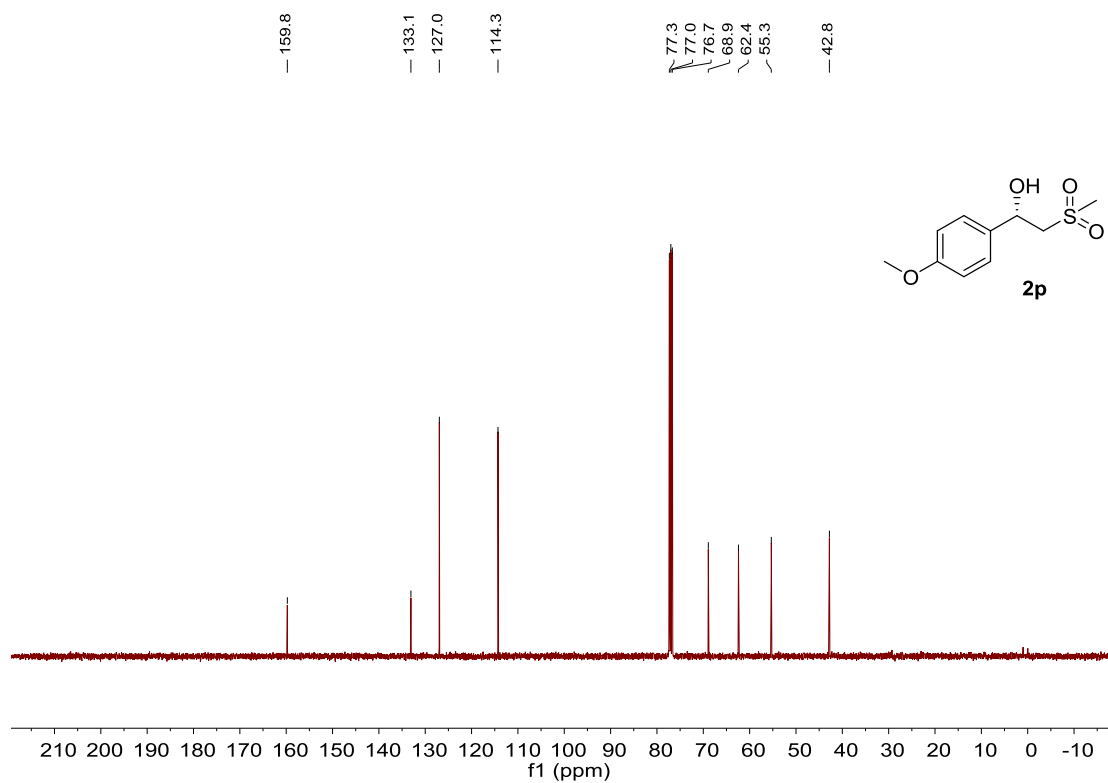



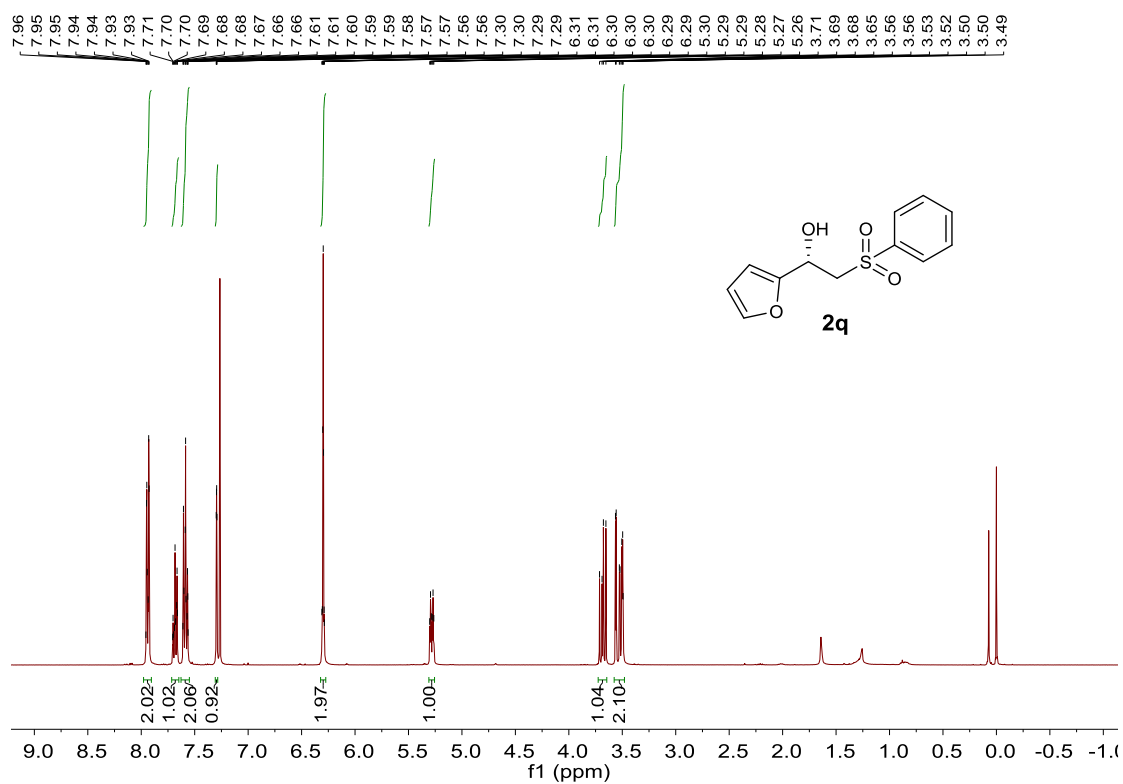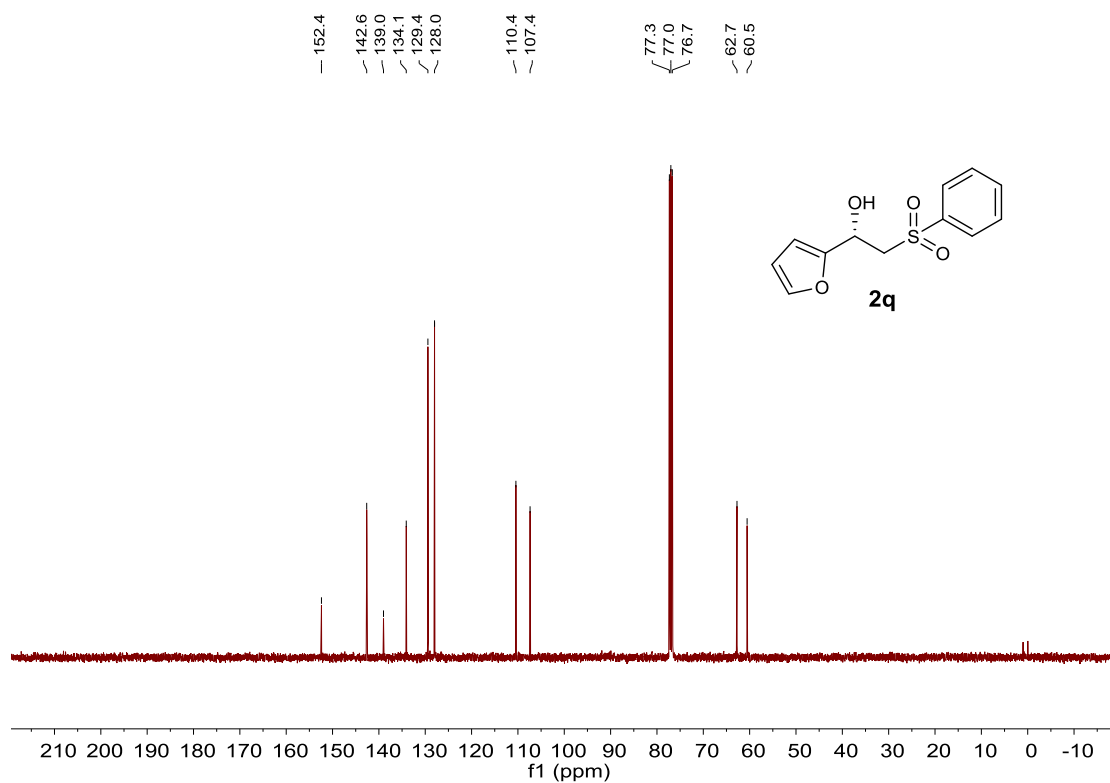

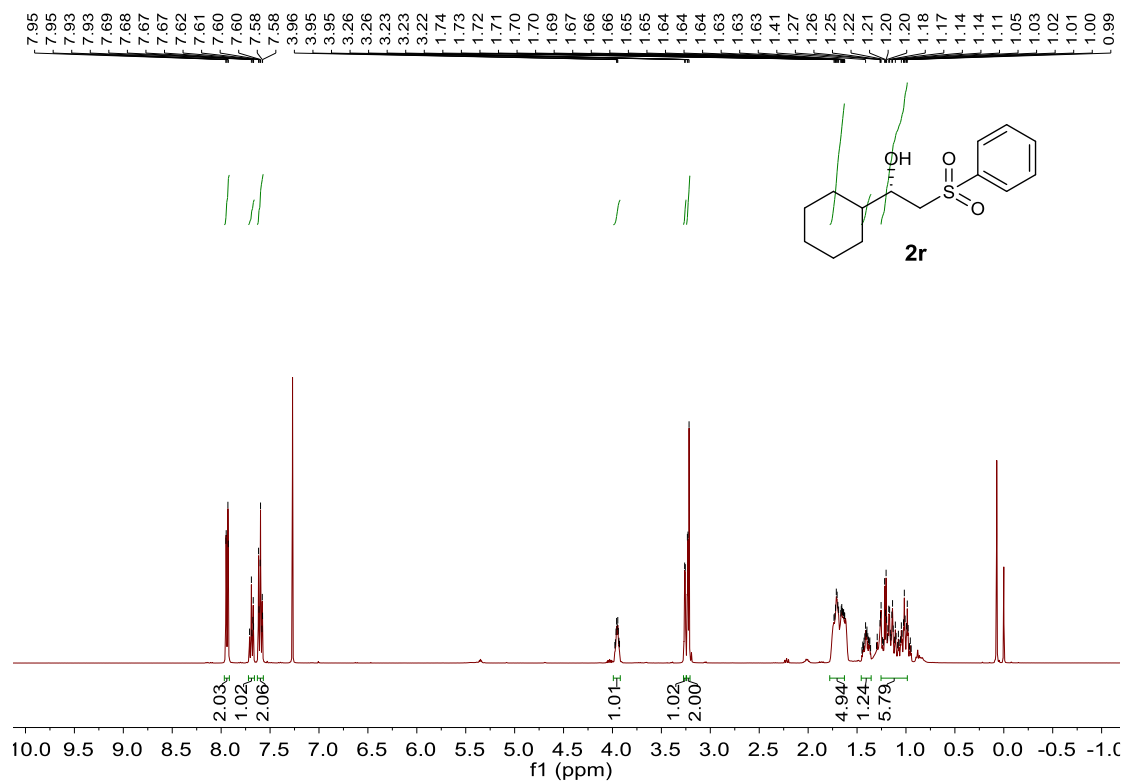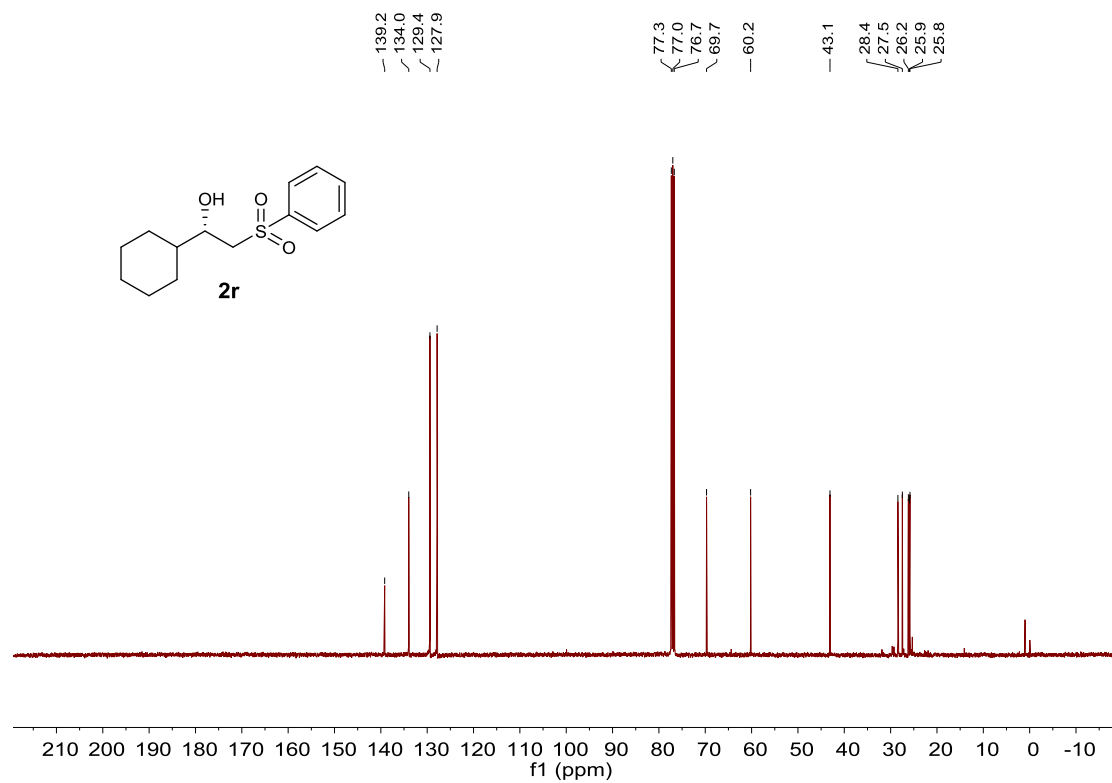

## 5. HPLC spectra

Data File D:\DATA\GU...NG\GYQB-INDOLE\GYQB-180723-TRI-RAC-1 2018-07-23 14-42-13\051-5601.D  
Sample Name: TL-ph-ph-rac

```
=====
Acq. Operator   :                               Seq. Line : 56
Acq. Instrument : Instrument 2                   Location  : Vial 51
Injection Date  : 7/25/2018 12:27:43 AM          Inj       : 1
                                                Inj Volume: 3.000 µl

Acq. Method     : D:\DATA\GUAN YUQING\GYQB-INDOLE\GYQB-180723-TRI-RAC-1 2018-07-23 14-42-13
                  \DAD-OJ(1-6)-80-20-1ML-3UL-ALL-70MIN.M
Last changed    : 6/28/2018 8:52:23 PM
Analysis Method : D:\METHOD\LWD\DAD-AD(1-6)-90-10-0.7ML-3UL-ALL-70MIN.M
Last changed    : 8/21/2018 9:47:34 AM
                  (modified after loading)
Additional Info : Peak(s) manually integrated
```

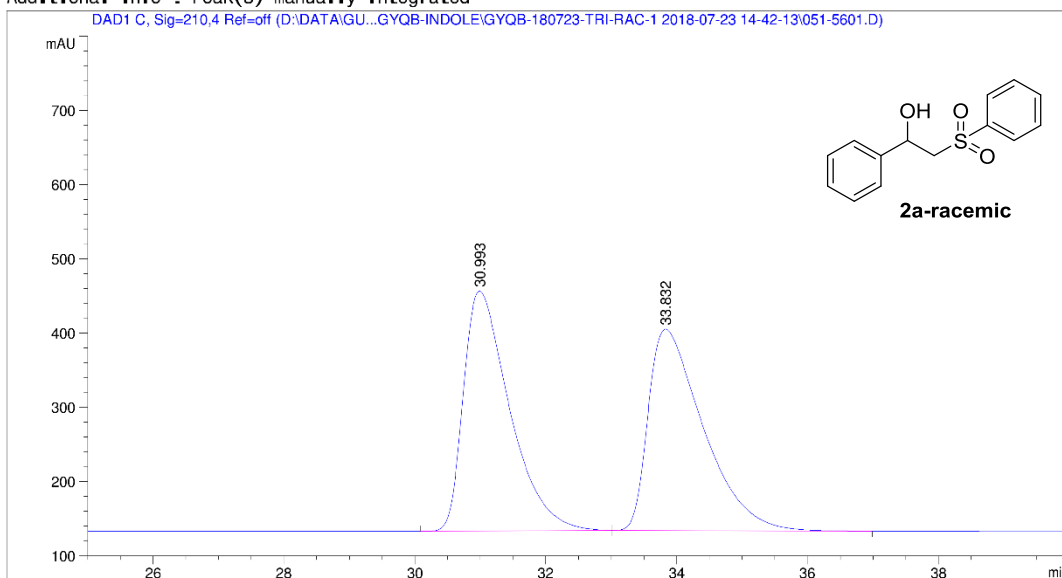

### Area Percent Report

```
=====
Sorted By      : Signal
Multiplier     : 1.0000
Dilution       : 1.0000
Use Multiplier & Dilution Factor with ISTDs
```

Signal 1: DAD1 C, Sig=210,4 Ref=off

| Peak # | RetTime [min] | Type | Width [min] | Area [mAU*s] | Height [mAU] | Area %  |
|--------|---------------|------|-------------|--------------|--------------|---------|
| 1      | 30.993        | BB   | 0.7358      | 1.58370e4    | 323.13983    | 49.9975 |
| 2      | 33.832        | BB   | 0.8511      | 1.58385e4    | 271.31900    | 50.0025 |

Totals : 3.16755e4 594.45883

Data File D:\DATA\GU...NG\GYQB-INDOLE\GYQB-180723-TRI-RAC-1 2018-07-23 14-42-13\052-5701.D  
Sample Name: TL-ph-ph-rac

```
=====
Acq. Operator   :                               Seq. Line :   57
Acq. Instrument : Instrument 2                  Location  : Vial 52
Injection Date  : 7/25/2018 1:15:41 AM         Inj       :    1
                                           Inj Volume: 3.000 µl

Acq. Method     : D:\DATA\GUAN YUQING\GYQB-INDOLE\GYQB-180723-TRI-RAC-1 2018-07-23 14-42-13
                  \DAD-OJ(1-6)-80-20-1ML-3UL-ALL-70MIN.M
Last changed    : 6/28/2018 8:52:23 PM
Analysis Method : D:\METHOD\LWD\DAD-AD(1-6)-90-10-0.7ML-3UL-ALL-70MIN.M
Last changed    : 8/21/2018 9:48:33 AM
                  (modified after loading)
Additional Info : Peak(s) manually integrated
=====
```

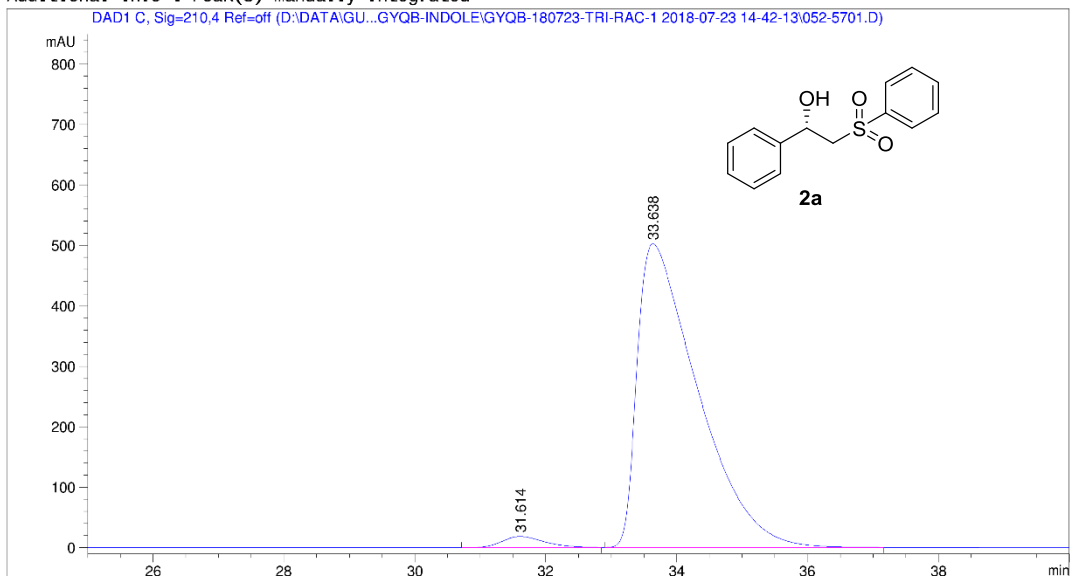

#### Area Percent Report

```
=====
Sorted By      : Signal
Multiplier     : 1.0000
Dilution       : 1.0000
Use Multiplier & Dilution Factor with ISTDs
=====
```

Signal 1: DAD1 C, Sig=210,4 Ref=off

| Peak # | RetTime [min] | Type | Width [min] | Area [mAU*s] | Height [mAU] | Area %  |
|--------|---------------|------|-------------|--------------|--------------|---------|
| 1      | 31.614        | BB   | 0.6241      | 828.07184    | 18.36459     | 2.5013  |
| 2      | 33.638        | BB   | 0.9194      | 3.22780e4    | 502.49078    | 97.4987 |

Totals : 3.31061e4 520.85537

Data File D:\DATA\GUAN YUQING\LJ-3-172\LJ-3-172 2018-07-21 16-17-20\071-1901.D  
Sample Name: TL-2-MeO-ph-rac

=====

|                 |   |                      |            |   |          |
|-----------------|---|----------------------|------------|---|----------|
| Acq. Operator   | : |                      | Seq. Line  | : | 19       |
| Acq. Instrument | : | Instrument 1         | Location   | : | Vial 71  |
| Injection Date  | : | 7/22/2018 6:43:23 AM | Inj        | : | 1        |
|                 |   |                      | Inj Volume | : | 3.000 µl |

Acq. Method : D:\DATA\GUAN YUQING\LJ-3-172\LJ-3-172 2018-07-21 16-17-20\VWD-AD(1-2)-90-10  
-1ML-3UL-210NM-55MIN.M

Last changed : 5/29/2018 8:00:31 PM

Analysis Method : D:\METHOD\LWD\NAD-AD(1-6)-95-5-1ML-2UL-ALL-20MIN.M

Last changed : 8/20/2018 9:14:25 PM  
(modified after loading)

Additional Info : Peak(s) manually integrated

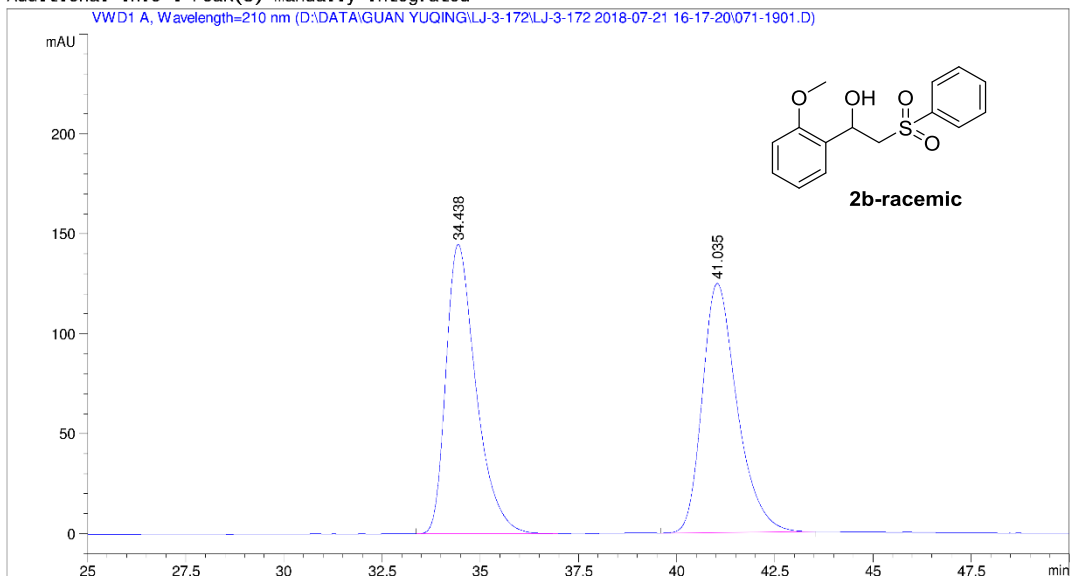

=====  
Area Percent Report  
=====

Sorted By : Signal  
Multiplier : 1.0000  
Dilution : 1.0000  
Use Multiplier & Dilution Factor with ISTDs

Signal 1: VWD1 A, Wavelength=210 nm

| Peak # | RetTime [min] | Type | Width [min] | Area [mAU*s] | Height [mAU] | Area %  |
|--------|---------------|------|-------------|--------------|--------------|---------|
| 1      | 34.438        | BB   | 0.8071      | 7703.96484   | 144.70210    | 50.0026 |
| 2      | 41.035        | BB   | 0.9317      | 7703.17529   | 124.69363    | 49.9974 |

Totals : 1.54071e4 269.39573

Data File D:\DATA\GUAN YUQING\LJ-3-172\LJ-3-172 2018-07-21 16-17-20\072-2001.D  
Sample Name: TL-2-MeO-ph-ee

```
=====
Acq. Operator   :                               Seq. Line :   20
Acq. Instrument : Instrument 1                   Location  : Vial 72
Injection Date  : 7/22/2018 7:39:14 AM           Inj       :    1
                                           Inj Volume : 3.000 µl

Acq. Method     : D:\DATA\GUAN YUQING\LJ-3-172\LJ-3-172 2018-07-21 16-17-20\VWD-AD(1-2)-90-10
                  -1ML-3UL-210NM-55MIN.M
Last changed    : 5/29/2018 8:00:31 PM
Analysis Method : D:\METHOD\LWD\NAD-AD(1-6)-95-5-1ML-2UL-ALL-20MIN.M
Last changed    : 8/20/2018 9:20:34 PM
                  (modified after loading)
Additional Info : Peak(s) manually integrated
=====
```

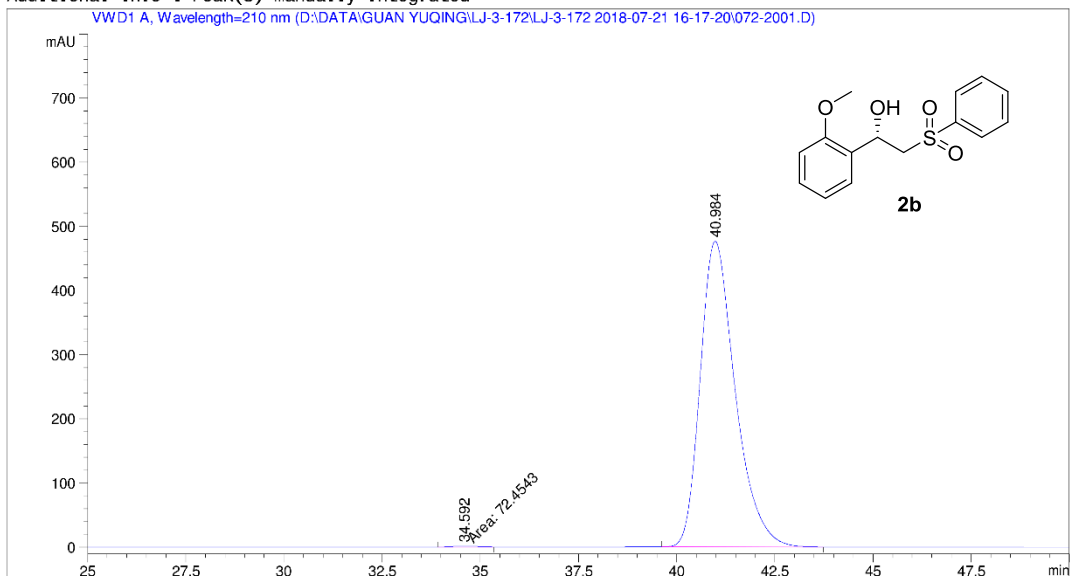

# Area Percent Report

```
=====
Sorted By      :      Signal
Multiplier     :      1.0000
Dilution       :      1.0000
Use Multiplier & Dilution Factor with ISTDs
=====
```

Signal 1: VWD1 A, Wavelength=210 nm

| Peak # | RetTime [min] | Type | Width [min] | Area [mAU*s] | Height [mAU] | Area %  |
|--------|---------------|------|-------------|--------------|--------------|---------|
| 1      | 34.592        | MM   | 0.7966      | 72.45431     | 1.51590      | 0.2449  |
| 2      | 40.984        | BB   | 0.9404      | 2.95174e4    | 476.07034    | 99.7551 |

Totals : 2.95899e4 477.58624

Data File D:\DATA\TL\TL-6\TL-8 2018-07-09 21-09-18\023-0401.D  
Sample Name: TL-3-MeO-ph-rac

```
=====
Acq. Operator   :                               Seq. Line :    4
Acq. Instrument : Instrument 2                   Location  : Vial 23
Injection Date  : 7/9/2018 10:43:17 PM           Inj       :    1
                                           Inj Volume : 3.000 µl

Acq. Method     : D:\DATA\TL\TL-6\TL-8 2018-07-09 21-09-18\DAD-CJ(1-6)-80-20-1ML-3UL-ALL-
                    55MIN.M
Last changed    : 7/9/2018 9:15:39 PM
Analysis Method : D:\METHOD\LWD\DAD-AD(1-6)-95-5-1ML-2UL-ALL-20MIN.M
Last changed    : 8/20/2018 9:42:06 PM
                (modified after loading)
Additional Info : Peak(s) manually integrated
=====
```

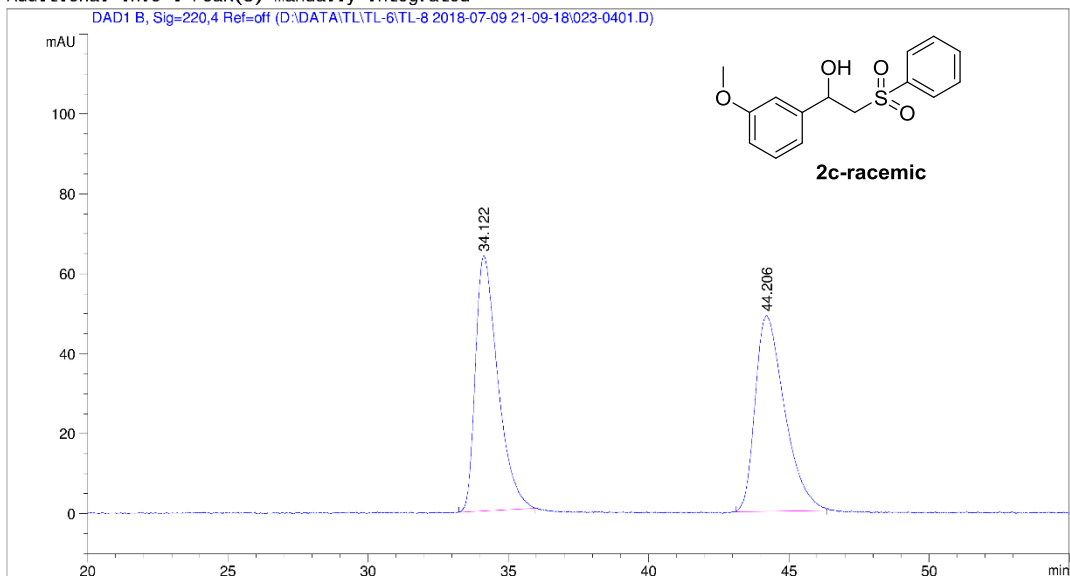

#### Area Percent Report

```
=====
Sorted By      :      Signal
Multiplier     :      1.0000
Dilution       :      1.0000
Use Multiplier & Dilution Factor with ISTDs
=====
```

Signal 1: DAD1 B, Sig=220,4 Ref=off

| Peak # | RetTime [min] | Type | Width [min] | Area [mAU*s] | Height [mAU] | Area %  |
|--------|---------------|------|-------------|--------------|--------------|---------|
| 1      | 34.122        | BB   | 0.6678      | 3548.98901   | 63.91422     | 49.8698 |
| 2      | 44.206        | BV   | 0.8612      | 3567.52515   | 49.01395     | 50.1302 |

Totals : 7116.51416 112.92818

Data File D:\DATA\TL\TL-6\TL-8 2018-07-09 21-09-18\024-0501.D  
Sample Name: TL-3-MeO-ph-ee

=====

|                 |   |                      |            |   |          |
|-----------------|---|----------------------|------------|---|----------|
| Acq. Operator   | : |                      | Seq. Line  | : | 5        |
| Acq. Instrument | : | Instrument 2         | Location   | : | Vial 24  |
| Injection Date  | : | 7/9/2018 11:39:15 PM | Inj        | : | 1        |
|                 |   |                      | Inj Volume | : | 3.000 µl |

Acq. Method : D:\DATA\TL\TL-6\TL-8 2018-07-09 21-09-18\024-0501.D-80-20-1ML-3UL-ALL-55MIN.M

Last changed : 7/9/2018 9:15:39 PM

Analysis Method : D:\METHOD\LWD\024-0501.D-95-5-1ML-2UL-ALL-20MIN.M

Last changed : 8/20/2018 9:42:59 PM  
(modified after loading)

Additional Info : Peak(s) manually integrated

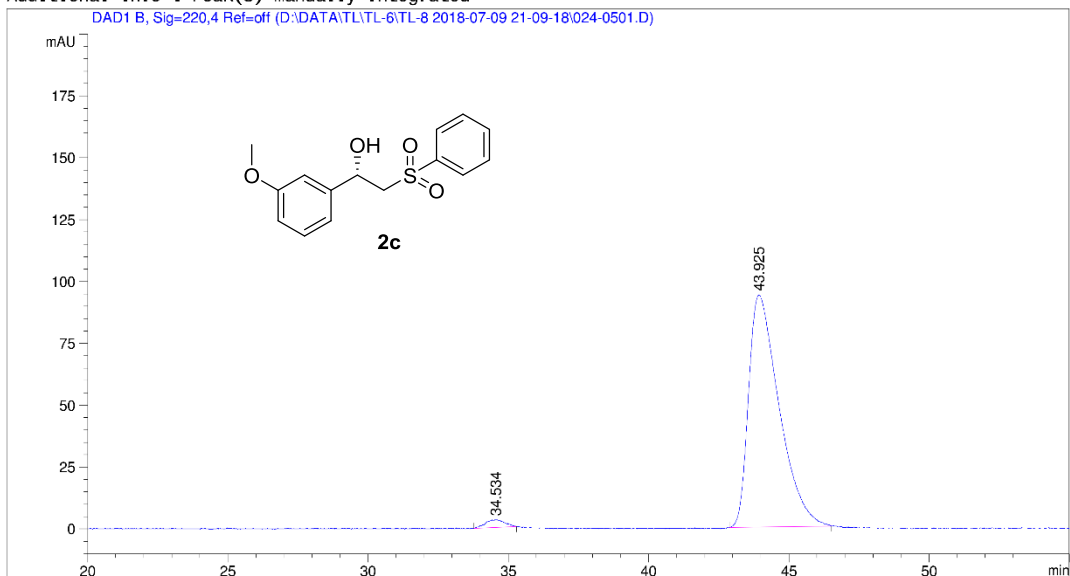

=====  
Area Percent Report  
=====

Sorted By : Signal  
Multiplier : 1.0000  
Dilution : 1.0000  
Use Multiplier & Dilution Factor with ISTDs

Signal 1: DAD1 B, Sig=220,4 Ref=off

| Peak # | RetTime [min] | Type | Width [min] | Area [mAU*s] | Height [mAU] | Area %  |
|--------|---------------|------|-------------|--------------|--------------|---------|
| 1      | 34.534        | BB   | 0.5624      | 149.22067    | 3.15135      | 2.0634  |
| 2      | 43.925        | BB   | 0.8869      | 7082.66650   | 93.80273     | 97.9366 |

Totals : 7231.88718 96.95408



Data File D:\DATA\LG\201812\20181213-LIGAND 2018-12-13 20-18-03\031-1501.D  
Sample Name: TL-4-MeO-PH-RAC

=====

|                 |   |                       |            |   |          |
|-----------------|---|-----------------------|------------|---|----------|
| Acq. Operator   | : |                       | Seq. Line  | : | 15       |
| Acq. Instrument | : | Instrument 1          | Location   | : | Vial 31  |
| Injection Date  | : | 12/14/2018 3:10:21 AM | Inj        | : | 1        |
|                 |   |                       | Inj Volume | : | 3.000 µl |

Acq. Method : D:\DATA\LG\201812\20181213-LIGAND 2018-12-13 20-18-03\VWD-AD(1-2)-90-10-0.  
5ML-3UL-210NM-200MIN.M

Last changed : 12/13/2018 9:25:57 PM

Analysis Method : D:\METHOD\TL\DAD-OJ(1-6)-80-20-1ML-3UL-ALL-50MIN.M

Last changed : 12/18/2018 8:01:06 PM  
(modified after loading)

Additional Info : Peak(s) manually integrated

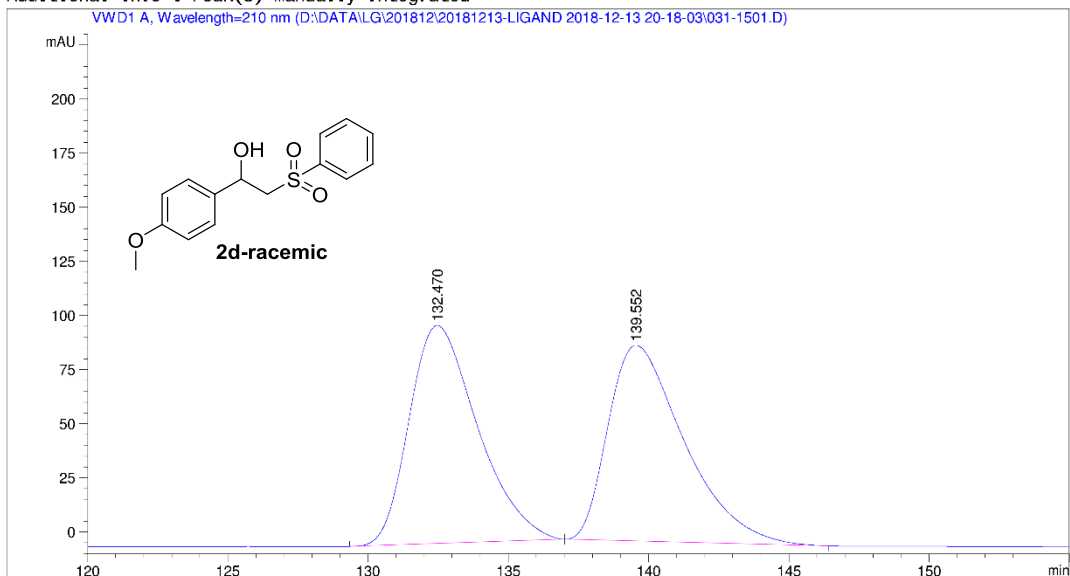

=====  
Area Percent Report  
=====

Sorted By : Signal  
Multiplier : 1.0000  
Dilution : 1.0000  
Use Multiplier & Dilution Factor with ISTDs

Signal 1: VWD1 A, Wavelength=210 nm

| Peak # | RetTime [min] | Type | Width [min] | Area [mAU*s] | Height [mAU] | Area %  |
|--------|---------------|------|-------------|--------------|--------------|---------|
| 1      | 132.470       | BB   | 2.5083      | 1.70786e4    | 100.71841    | 50.0808 |
| 2      | 139.552       | BB   | 2.6355      | 1.70235e4    | 90.37720     | 49.9192 |

Totals : 3.41022e4 191.09560

Data File D:\DATA\LG\201812\20181213-LIGAND 2018-12-13 20-18-03\032-1601.D  
Sample Name: TL-4-MeO-PH-EE

```
=====
Acq. Operator   :                               Seq. Line :   16
Acq. Instrument : Instrument 1                   Location  : Vial 32
Injection Date  : 12/14/2018 6:31:11 AM          Inj       :    1
                                           Inj Volume : 3.000 µl

Acq. Method     : D:\DATA\LG\201812\20181213-LIGAND 2018-12-13 20-18-03\VWD-AD(1-2)-90-10-0.
                  5ML-3UL-210NM-200MIN.M
Last changed    : 12/13/2018 9:25:57 PM
Analysis Method : D:\METHOD\TL\DAD-OJ(1-6)-80-20-1ML-3UL-ALL-50MIN.M
Last changed    : 12/18/2018 8:03:44 PM
                  (modified after loading)
Additional Info : Peak(s) manually integrated
=====
```

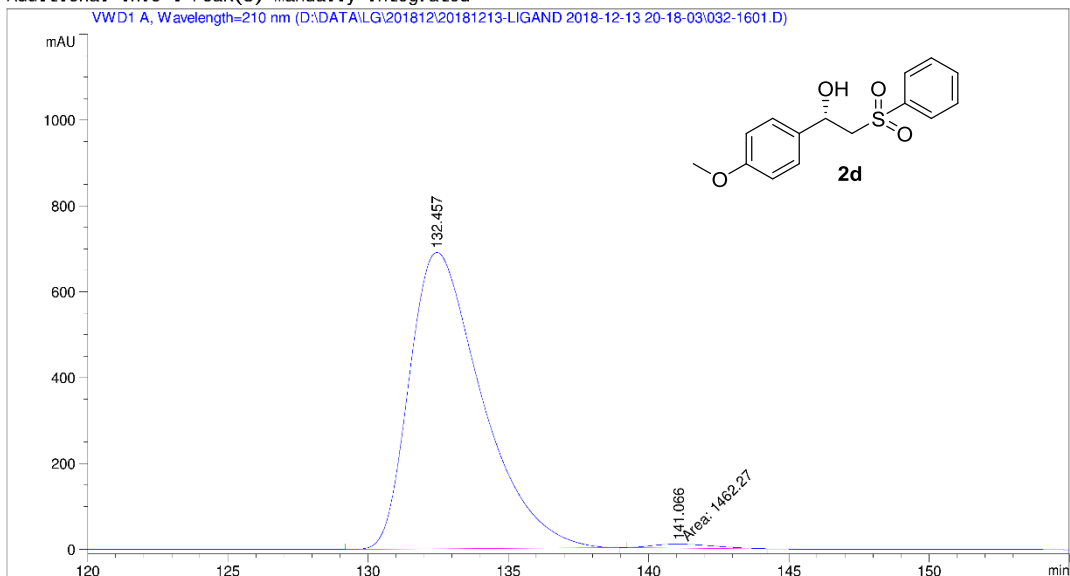

#### Area Percent Report

```
=====
Sorted By      :      Signal
Multiplier     :      1.0000
Dilution       :      1.0000
Use Multiplier & Dilution Factor with ISTDs
=====
```

Signal 1: VWD1 A, Wavelength=210 nm

| Peak # | RetTime [min] | Type | Width [min] | Area [mAU*s] | Height [mAU] | Area %  |
|--------|---------------|------|-------------|--------------|--------------|---------|
| 1      | 132.457       | BB   | 2.6948      | 1.23896e5    | 690.36621    | 98.8335 |
| 2      | 141.066       | MM   | 2.5153      | 1462.26697   | 9.68918      | 1.1665  |

Totals : 1.25358e5 700.05539

Data File D:\DATA\TL\TL-6\TL-8 2018-07-09 21-09-18\021-0201.D  
Sample Name: TL-2-F-ph-rac

```
=====
Acq. Operator   :                               Seq. Line :    2
Acq. Instrument : Instrument 2                  Location  : Vial 21
Injection Date  : 7/9/2018 9:21:21 PM          Inj       :    1
                                           Inj Volume : 3.000 µl

Acq. Method     : D:\DATA\TL\TL-6\TL-8 2018-07-09 21-09-18\DAD-CJ(1-6)-80-20-1ML-3UL-ALL-
                  40MIN.M
Last changed    : 7/9/2018 9:06:51 PM
Analysis Method : D:\METHOD\LWD\DAD-AD(1-6)-95-5-1ML-2UL-ALL-20MIN.M
Last changed    : 8/20/2018 9:47:55 PM
                  (modified after loading)
Additional Info : Peak(s) manually integrated
=====
```

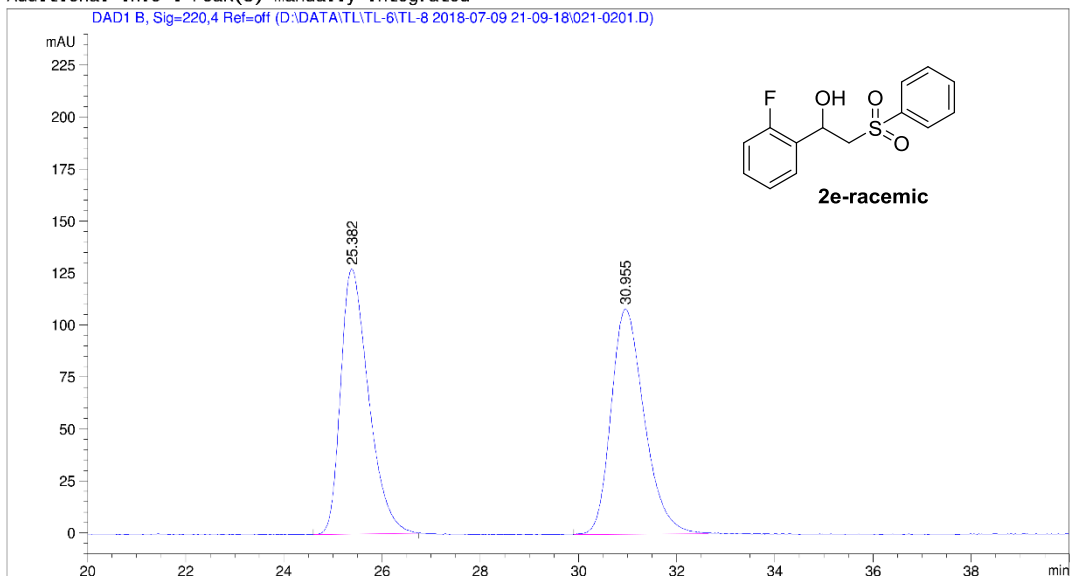

# Area Percent Report

```
=====
Sorted By      :      Signal
Multiplier     :      1.0000
Dilution       :      1.0000
Use Multiplier & Dilution Factor with ISTDs
=====
```

Signal 1: DAD1 B, Sig=220,4 Ref=off

| Peak # | RetTime [min] | Type | Width [min] | Area [mAU*s] | Height [mAU] | Area %  |
|--------|---------------|------|-------------|--------------|--------------|---------|
| 1      | 25.382        | BB   | 0.5636      | 5049.20996   | 127.61078    | 49.7639 |
| 2      | 30.955        | BV   | 0.6407      | 5097.11279   | 108.38634    | 50.2361 |

Totals : 1.01463e4 235.99712

Data File D:\DATA\TL\TL-6\TL-8 2018-07-09 21-09-18\022-0301.D  
Sample Name: TL-2-F-ph-ee

```
=====
Acq. Operator   :                               Seq. Line :    3
Acq. Instrument : Instrument 2                  Location  : Vial 22
Injection Date  : 7/9/2018 10:02:17 PM          Inj       :    1
                                           Inj Volume : 3.000 µl

Acq. Method     : D:\DATA\TL\TL-6\TL-8 2018-07-09 21-09-18\DAD-CJ(1-6)-80-20-1ML-3UL-ALL-
                  40MIN.M
Last changed    : 7/9/2018 9:06:51 PM
Analysis Method : D:\METHOD\LWD\DAD-AD(1-6)-95-5-1ML-2UL-ALL-20MIN.M
Last changed    : 8/20/2018 9:48:53 PM
                  (modified after loading)
Additional Info : Peak(s) manually integrated
=====
```

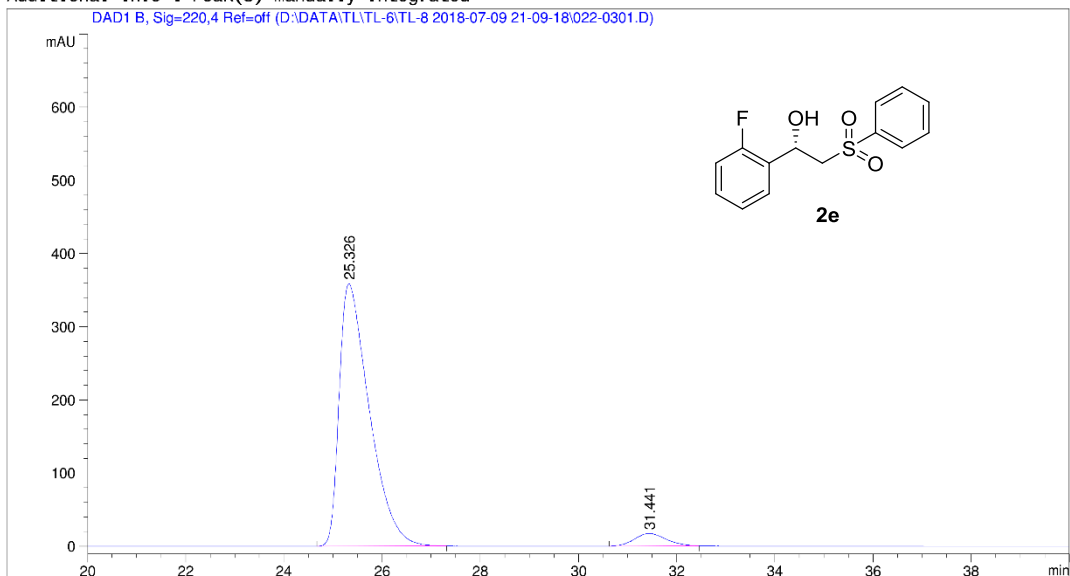

# Area Percent Report

```
=====
Sorted By      :      Signal
Multiplier     :      1.0000
Dilution       :      1.0000
Use Multiplier & Dilution Factor with ISTDs
=====
```

Signal 1: DAD1 B, Sig=220,4 Ref=off

| Peak # | RetTime [min] | Type | Width [min] | Area [mAU*s] | Height [mAU] | Area %  |
|--------|---------------|------|-------------|--------------|--------------|---------|
| 1      | 25.326        | BB   | 0.6149      | 1.52677e4    | 358.47754    | 95.1553 |
| 2      | 31.441        | BV   | 0.5417      | 777.33984    | 17.12177     | 4.8447  |

Totals : 1.60450e4 375.59930

Data File D:\DATA\TL\TL-6\TL-8 2018-07-09 21-09-18\025-0601.D  
Sample Name: TL-4-F-ph-rac

=====

|                 |   |                       |            |   |          |
|-----------------|---|-----------------------|------------|---|----------|
| Acq. Operator   | : |                       | Seq. Line  | : | 6        |
| Acq. Instrument | : | Instrument 2          | Location   | : | Vial 25  |
| Injection Date  | : | 7/10/2018 12:35:15 AM | Inj        | : | 1        |
|                 |   |                       | Inj Volume | : | 3.000 µl |

Acq. Method : D:\DATA\TL\TL-6\TL-8 2018-07-09 21-09-18\DAD-CJ(1-6)-80-20-1ML-3UL-ALL-45MIN.M  
Last changed : 7/9/2018 9:24:11 PM  
Analysis Method : D:\METHOD\LWD\DAD-AD(1-6)-95-5-1ML-2UL-ALL-20MIN.M  
Last changed : 8/20/2018 9:44:35 PM  
(modified after loading)  
Additional Info : Peak(s) manually integrated

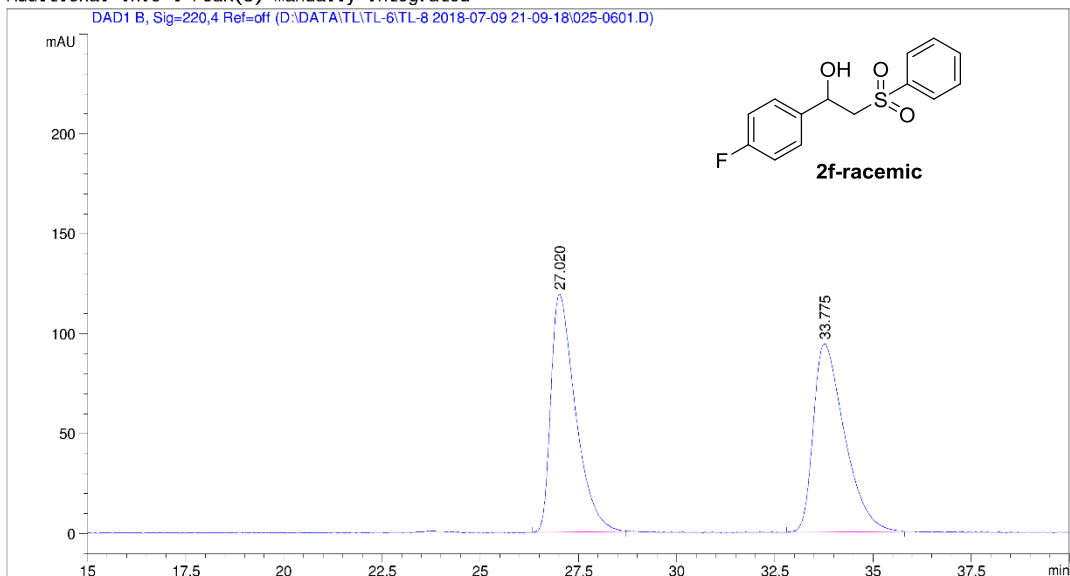

=====  
Area Percent Report  
=====

Sorted By : Signal  
Multiplier : 1.0000  
Dilution : 1.0000  
Use Multiplier & Dilution Factor with ISTDs

Signal 1: DAD1 B, Sig=220,4 Ref=off

| Peak # | RetTime [min] | Type | Width [min] | Area [mAU*s] | Height [mAU] | Area %  |
|--------|---------------|------|-------------|--------------|--------------|---------|
| 1      | 27.020        | BV   | 0.6321      | 5188.89307   | 119.14967    | 49.8486 |
| 2      | 33.775        | BB   | 0.6662      | 5220.41846   | 94.24884     | 50.1514 |

Totals : 1.04093e4 213.39851

Data File D:\DATA\TL\TL-6\TL-8 2018-07-09 21-09-18\026-0701.D

Sample Name: TL-4-F-ph-ree

=====

|                 |   |                      |            |   |          |
|-----------------|---|----------------------|------------|---|----------|
| Acq. Operator   | : |                      | Seq. Line  | : | 7        |
| Acq. Instrument | : | Instrument 2         | Location   | : | Vial 26  |
| Injection Date  | : | 7/10/2018 1:21:13 AM | Inj        | : | 1        |
|                 |   |                      | Inj Volume | : | 3.000 µl |

Acq. Method : D:\DATA\TL\TL-6\TL-8 2018-07-09 21-09-18\DAD-CJ(1-6)-80-20-1ML-3UL-ALL-45MIN.M

Last changed : 7/9/2018 9:24:11 PM

Analysis Method : D:\METHOD\LWD\DAD-AD(1-6)-95-5-1ML-2UL-ALL-20MIN.M

Last changed : 8/20/2018 9:46:09 PM  
(modified after loading)

Additional Info : Peak(s) manually integrated

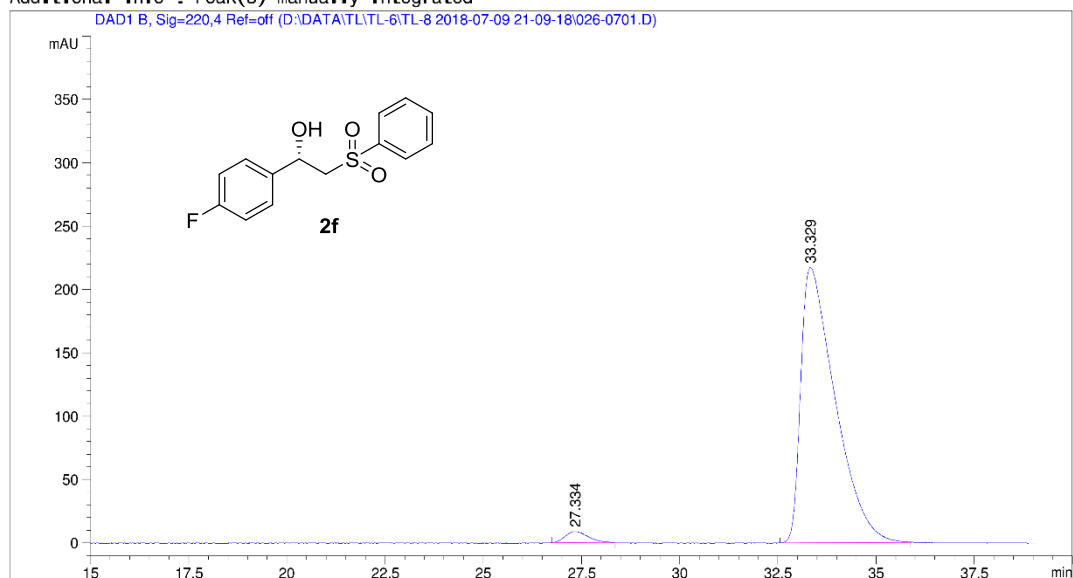

=====  
Area Percent Report  
=====

Sorted By : Signal  
Multiplier : 1.0000  
Dilution : 1.0000  
Use Multiplier & Dilution Factor with ISTDs

Signal 1: DAD1 B, Sig=220,4 Ref=off

| Peak # | RetTime [min] | Type | Width [min] | Area [mAU*s] | Height [mAU] | Area %  |
|--------|---------------|------|-------------|--------------|--------------|---------|
| 1      | 27.334        | BV   | 0.4831      | 363.98114    | 8.86326      | 2.6803  |
| 2      | 33.329        | BV   | 0.8014      | 1.32157e4    | 217.33136    | 97.3197 |

Totals : 1.35796e4 226.19462

Instrument 2 8/20/2018 9:46:12 PM

Page 1 of 2

Data File D:\DATA\TL\TL-6\TL-7 2018-07-03 21-09-37\061-0201.D  
Sample Name: TL-3-Br-ph-rac

```
=====
Acq. Operator   :                               Seq. Line :    2
Acq. Instrument : Instrument 1                  Location  : Vial 61
Injection Date  : 7/3/2018 9:21:26 PM          Inj       :    1
                                           Inj Volume : 3.000 µl

Acq. Method     : D:\DATA\TL\TL-6\TL-7 2018-07-03 21-09-37\VWD-AD(1-2)-90-10-1ML-3UL-210NM-
                  40MIN.M
Last changed    : 7/3/2018 9:05:40 PM
Analysis Method : D:\METHOD\LWD\AD-AD(1-6)-95-5-1ML-2UL-ALL-20MIN.M
Last changed    : 8/20/2018 9:35:20 PM
                  (modified after loading)
Additional Info : Peak(s) manually integrated
=====
```

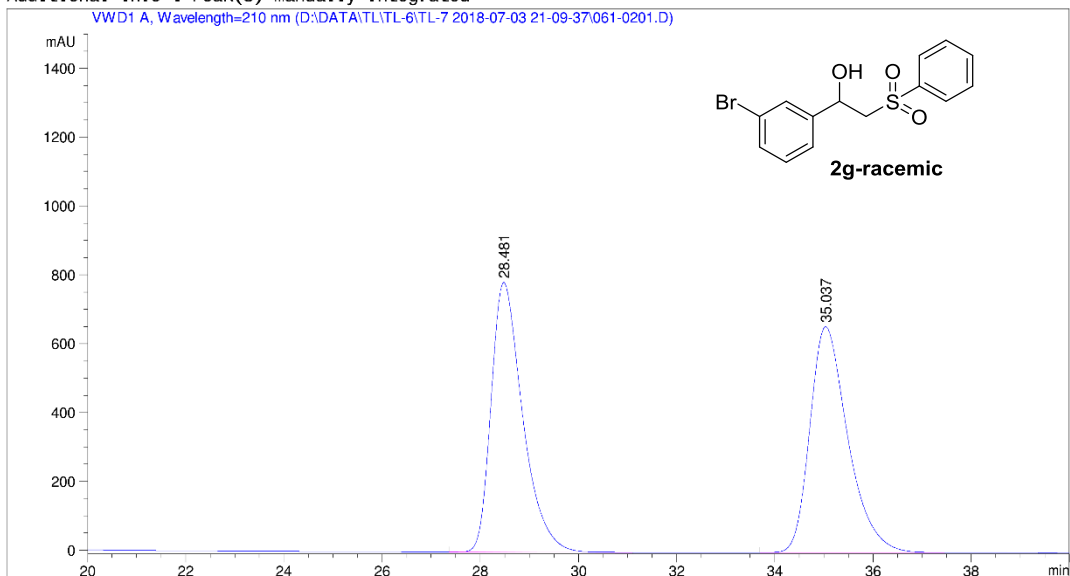

#### Area Percent Report

```
=====
Sorted By      : Signal
Multiplier     : 1.0000
Dilution       : 1.0000
Use Multiplier & Dilution Factor with ISTDs
=====
```

Signal 1: VWD1 A, Wavelength=210 nm

| Peak # | RetTime [min] | Type | Width [min] | Area [mAU*s] | Height [mAU] | Area %  |
|--------|---------------|------|-------------|--------------|--------------|---------|
| 1      | 28.481        | BB   | 0.6761      | 3.49141e4    | 783.19885    | 49.7706 |
| 2      | 35.037        | BB   | 0.8215      | 3.52360e4    | 656.15796    | 50.2294 |

Totals : 7.01501e4 1439.35681

Data File D:\DATA\TL\TL-6\TL-7 2018-07-03 21-09-37\062-0301.D  
Sample Name: TL-3-Br-ph-ree

=====

|                 |   |                      |            |   |          |
|-----------------|---|----------------------|------------|---|----------|
| Acq. Operator   | : |                      | Seq. Line  | : | 3        |
| Acq. Instrument | : | Instrument 1         | Location   | : | Vial 62  |
| Injection Date  | : | 7/3/2018 10:02:16 PM | Inj        | : | 1        |
|                 |   |                      | Inj Volume | : | 3.000 µl |

Acq. Method : D:\DATA\TL\TL-6\TL-7 2018-07-03 21-09-37\VWD-AD(1-2)-90-10-1ML-3UL-210NM-40MIN.M  
Last changed : 7/3/2018 9:05:40 PM  
Analysis Method : D:\METHOD\LWD\NAD-AD(1-6)-95-5-1ML-2UL-ALL-20MIN.M  
Last changed : 8/20/2018 9:37:46 PM  
(modified after loading)  
Additional Info : Peak(s) manually integrated

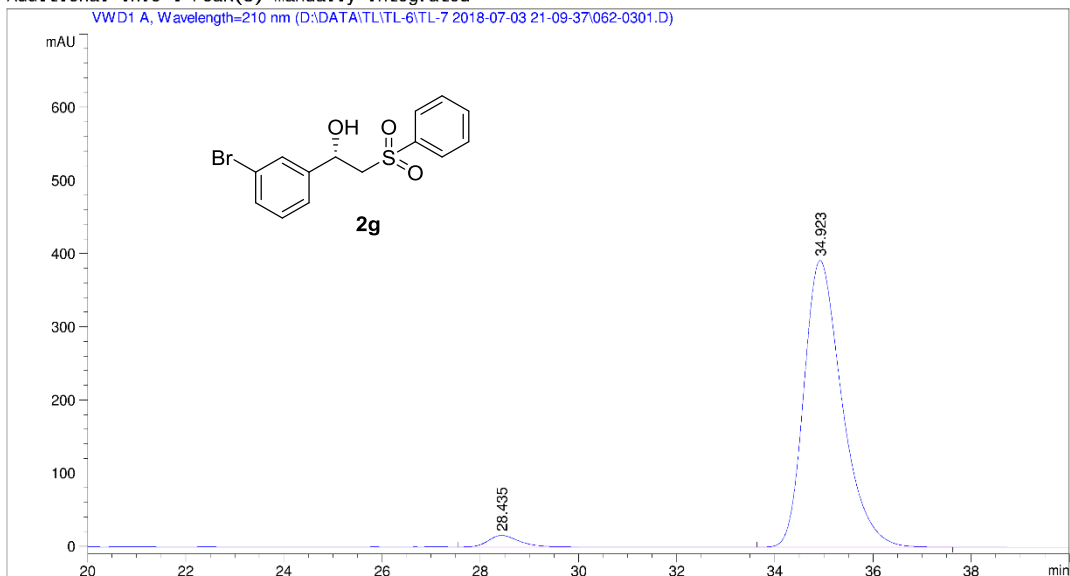

=====  
Area Percent Report  
=====

Sorted By : Signal  
Multiplier : 1.0000  
Dilution : 1.0000  
Use Multiplier & Dilution Factor with ISTDs

Signal 1: VWD1 A, Wavelength=210 nm

| Peak # | RetTime [min] | Type | Width [min] | Area [mAU*s] | Height [mAU] | Area %  |
|--------|---------------|------|-------------|--------------|--------------|---------|
| 1      | 28.435        | BB   | 0.6577      | 694.79932    | 15.81091     | 3.2002  |
| 2      | 34.923        | BB   | 0.8195      | 2.10163e4    | 391.36459    | 96.7998 |

Totals : 2.17111e4 407.17551



Data File D:\DATA\LYH\LYH-2-EE\LYH-3-477 2018-05-28 10-23-06\021-2501.D  
Sample Name: **tl-4-Br-ph-rac**

```
=====
Acq. Operator   :                               Seq. Line :   25
Acq. Instrument : Instrument 2                  Location  : Vial 21
Injection Date  : 5/29/2018 5:22:01 AM          Inj       :    1
                                           Inj Volume: 2.000 µl

Acq. Method     : D:\DATA\LYH\LYH-2-EE\LYH-3-477 2018-05-28 10-23-06\DAD-QJ(1-6)-80-20-1ML-
                  2UL-ALL-80MIN.M
Last changed    : 5/28/2018 4:24:25 PM
Analysis Method : D:\METHOD\YCC\DAD-QJ(1-6)-80-20-1ML-1UL-ALL-60MIN.M
Last changed    : 11/6/2018 9:03:47 PM
                  (modified after loading)
Additional Info  : Peak(s) manually integrated
=====
```

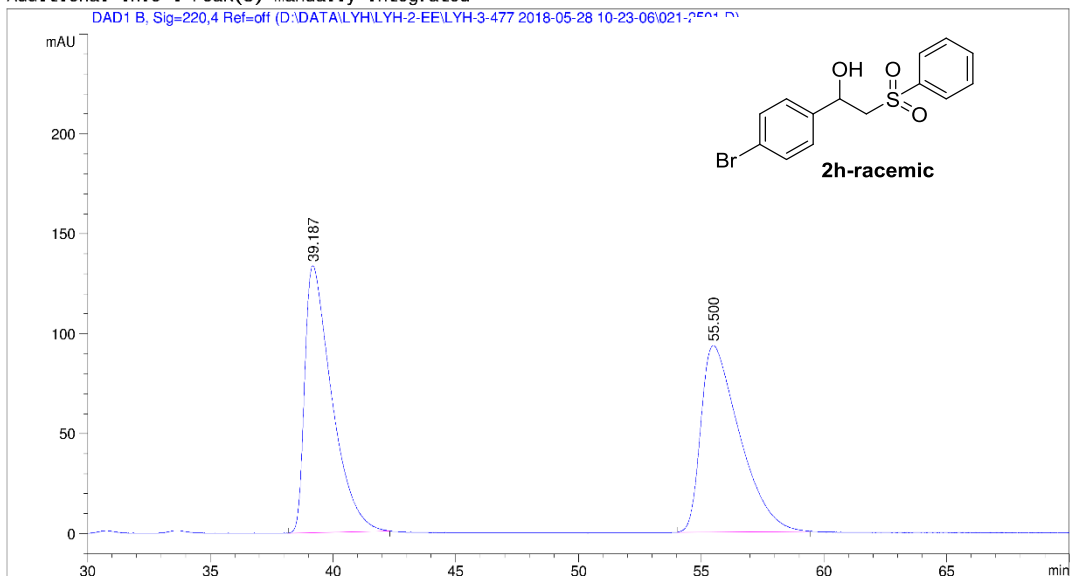

#### Area Percent Report

```
=====
Sorted By      : Signal
Multiplier     : 1.0000
Dilution       : 1.0000
Use Multiplier & Dilution Factor with ISTDs
=====
```

Signal 1: DAD1 B, Sig=220,4 Ref=off

| Peak # | RetTime [min] | Type | Width [min] | Area [mAU*s] | Height [mAU] | Area %  |
|--------|---------------|------|-------------|--------------|--------------|---------|
| 1      | 39.187        | BB   | 0.9226      | 1.02205e4    | 133.58096    | 49.9718 |
| 2      | 55.500        | BB   | 1.2836      | 1.02320e4    | 93.43902     | 50.0282 |

Totals :                      2.04525e4    227.01998

Data File D:\DATA\TL\TL-3\TL-5 2018-06-15 20-55-12\014-0701.D  
Sample Name: TL-4-Br-ph-rac

```
=====
Acq. Operator   :                               Seq. Line :    7
Acq. Instrument : Instrument 2                  Location  : Vial 14
Injection Date  : 6/15/2018 11:22:06 PM         Inj       :    1
                                           Inj Volume : 2.000 µl

Acq. Method     : D:\DATA\TL\TL-3\TL-5 2018-06-15 20-55-12\DAD-CJ(1-6)-80-20-1ML-2UL-ALL-
                  70MIN.M
Last changed    : 6/15/2018 8:43:36 PM
Analysis Method : D:\METHOD\LWD\DAD-AD(1-6)-95-5-1ML-2UL-ALL-20MIN.M
Last changed    : 8/20/2018 8:50:57 PM
                  (modified after loading)
Additional Info : Peak(s) manually integrated
=====
```

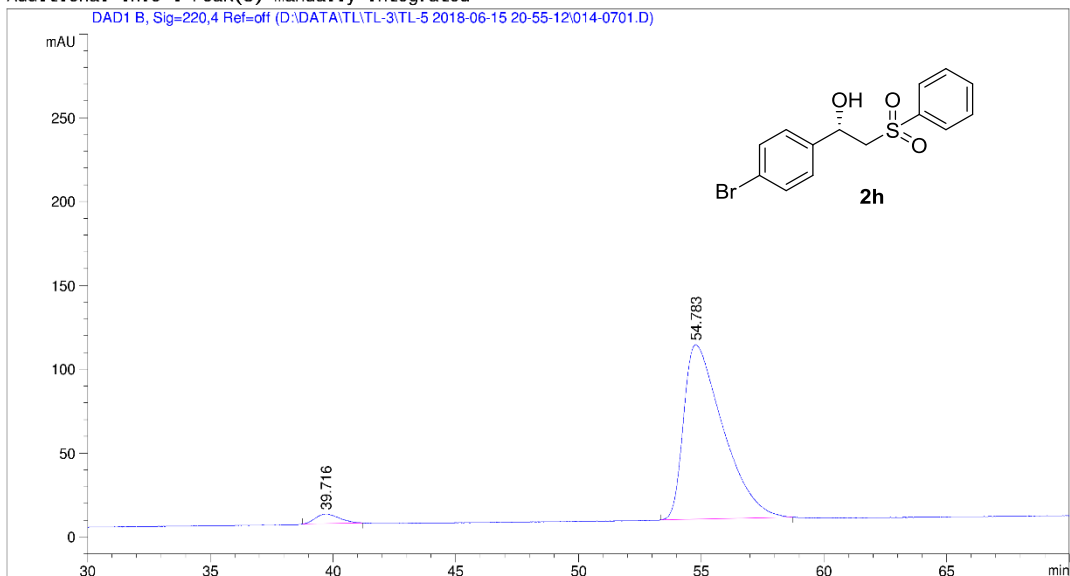

# Area Percent Report

```
=====
Sorted By      :      Signal
Multiplier     :      1.0000
Dilution       :      1.0000
Use Multiplier & Dilution Factor with ISTDs
=====
```

Signal 1: DAD1 B, Sig=220,4 Ref=off

| Peak # | RetTime [min] | Type | Width [min] | Area [mAU*s] | Height [mAU] | Area %  |
|--------|---------------|------|-------------|--------------|--------------|---------|
| 1      | 39.716        | BB   | 0.7975      | 391.70309    | 5.77394      | 3.2672  |
| 2      | 54.783        | BB   | 1.3048      | 1.15972e4    | 104.17376    | 96.7328 |

Totals : 1.19889e4 109.94770

Data File D:\DATA\YCC\20180630\YCC-264-34 2018-07-12 18-34-01\075-2101.D  
Sample Name: TL-4-Me-ph-rac

=====

|                 |   |                      |            |   |          |
|-----------------|---|----------------------|------------|---|----------|
| Acq. Operator   | : |                      | Seq. Line  | : | 21       |
| Acq. Instrument | : | Instrument 2         | Location   | : | Vial 75  |
| Injection Date  | : | 7/13/2018 4:22:03 AM | Inj        | : | 1        |
|                 |   |                      | Inj Volume | : | 3.000 µl |

Acq. Method : D:\DATA\YCC\20180630\YCC-264-34 2018-07-12 18-34-01\DAD-QJ(1-6)-80-20-1ML-3UL-ALL-40MIN.M  
Last changed : 7/9/2018 9:06:51 PM  
Analysis Method : D:\METHOD\LWD\DAD-AD(1-6)-95-5-1ML-2UL-ALL-20MIN.M  
Last changed : 8/20/2018 9:50:39 PM  
(modified after loading)  
Additional Info : Peak(s) manually integrated

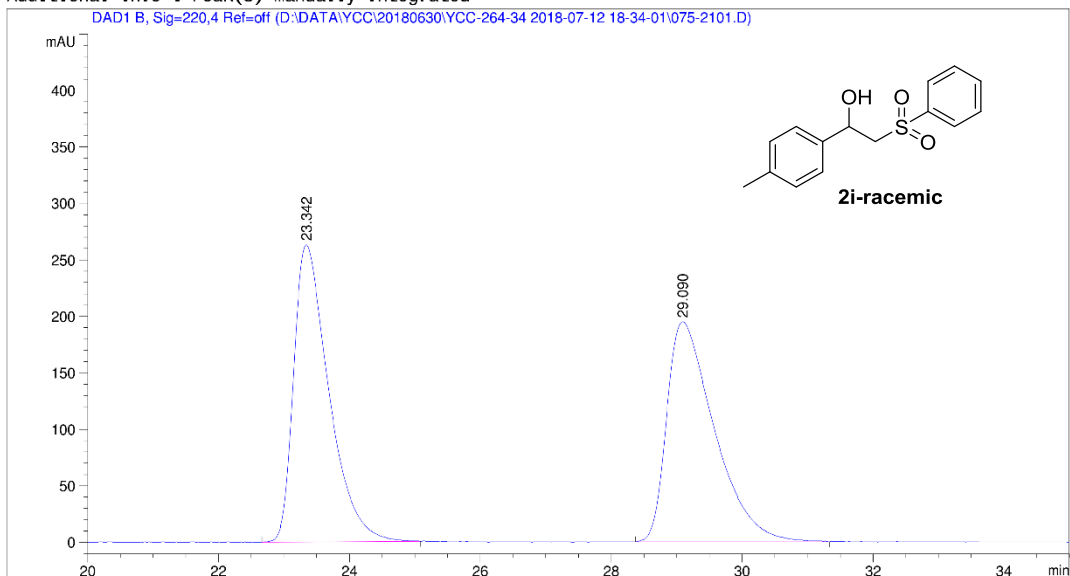

=====  
Area Percent Report  
=====

Sorted By : Signal  
Multiplier : 1.0000  
Dilution : 1.0000  
Use Multiplier & Dilution Factor with ISTDs

Signal 1: DAD1 B, Sig=220,4 Ref=off

| Peak # | RetTime [min] | Type | Width [min] | Area [mAU*s] | Height [mAU] | Area %  |
|--------|---------------|------|-------------|--------------|--------------|---------|
| 1      | 23.342        | BB   | 0.5393      | 9802.63770   | 262.74643    | 49.9829 |
| 2      | 29.090        | BB   | 0.6898      | 9809.33984   | 194.69162    | 50.0171 |

Totals : 1.96120e4 457.43805

Data File D:\DATA\YCC\20180630\YCC-264-34 2018-07-12 18-34-01\076-2201.D  
Sample Name: TL-4-Me-ph-ee

=====

|                 |   |                      |            |   |          |
|-----------------|---|----------------------|------------|---|----------|
| Acq. Operator   | : |                      | Seq. Line  | : | 22       |
| Acq. Instrument | : | Instrument 2         | Location   | : | Vial 76  |
| Injection Date  | : | 7/13/2018 5:03:02 AM | Inj        | : | 1        |
|                 |   |                      | Inj Volume | : | 3.000 µl |

Acq. Method : D:\DATA\YCC\20180630\YCC-264-34 2018-07-12 18-34-01\DAD-QJ(1-6)-80-20-1ML-3UL-ALL-40MIN.M  
Last changed : 7/9/2018 9:06:51 PM  
Analysis Method : D:\METHOD\LWD\DAD-AD(1-6)-95-5-1ML-2UL-ALL-20MIN.M  
Last changed : 8/20/2018 9:52:13 PM  
(modified after loading)  
Additional Info : Peak(s) manually integrated

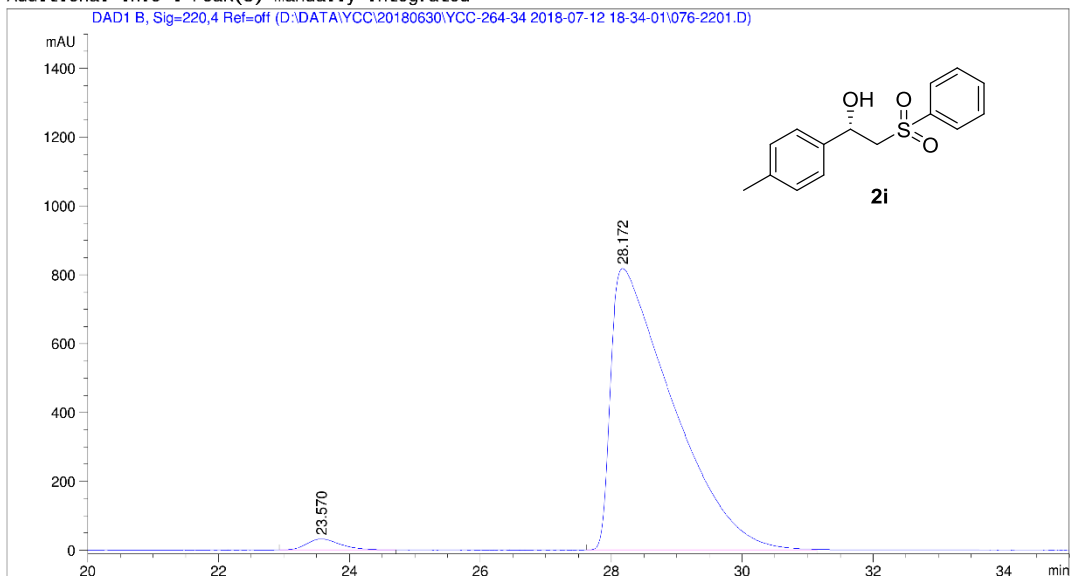

=====  
Area Percent Report  
=====

Sorted By : Signal  
Multiplier : 1.0000  
Dilution : 1.0000  
Use Multiplier & Dilution Factor with ISTDs

Signal 1: DAD1 B, Sig=220,4 Ref=off

| Peak # | RetTime [min] | Type | Width [min] | Area [mAU*s] | Height [mAU] | Area %  |
|--------|---------------|------|-------------|--------------|--------------|---------|
| 1      | 23.570        | BV   | 0.4595      | 1160.58228   | 32.12264     | 2.1156  |
| 2      | 28.172        | BV   | 0.8518      | 5.36976e4    | 818.01746    | 97.8844 |

Totals : 5.48582e4 850.14009

Data File D:\DATA\TL\TL-6\TL-8 2018-07-09 21-09-18\027-0801.D  
Sample Name: TL-4-Cl-ph-rac

```
=====
Acq. Operator   :                               Seq. Line :    8
Acq. Instrument : Instrument 2                  Location  : Vial 27
Injection Date  : 7/10/2018 2:07:14 AM          Inj       :    1
                                           Inj Volume : 3.000 µl

Acq. Method     : D:\DATA\TL\TL-6\TL-8 2018-07-09 21-09-18\DAD-CJ(1-6)-80-20-1ML-3UL-ALL-
                    50MIN.M
Last changed    : 7/9/2018 9:28:06 PM
Analysis Method : D:\METHOD\LWD\DAD-AD(1-6)-95-5-1ML-2UL-ALL-20MIN.M
Last changed    : 8/20/2018 9:08:17 PM
                (modified after loading)
Additional Info : Peak(s) manually integrated
=====
```

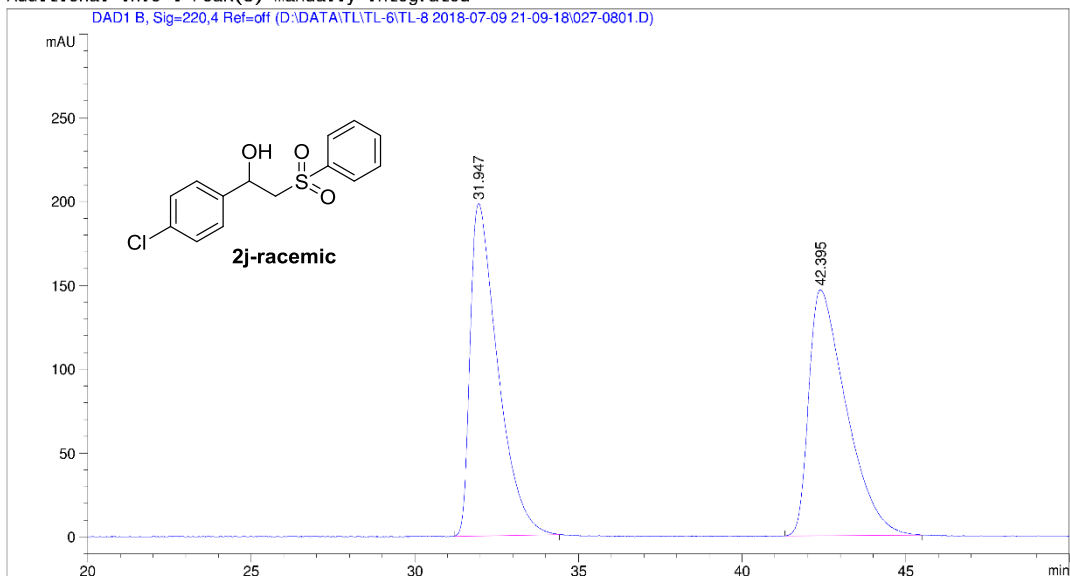

# Area Percent Report

```
=====
Sorted By      :      Signal
Multiplier     :      1.0000
Dilution       :      1.0000
Use Multiplier & Dilution Factor with ISTDs
=====
```

Signal 1: DAD1 B, Sig=220,4 Ref=off

| Peak # | RetTime [min] | Type | Width [min] | Area [mAU*s] | Height [mAU] | Area %  |
|--------|---------------|------|-------------|--------------|--------------|---------|
| 1      | 31.947        | BB   | 0.7134      | 1.16421e4    | 198.17842    | 49.8995 |
| 2      | 42.395        | BB   | 0.9343      | 1.16890e4    | 146.59465    | 50.1005 |

Totals : 2.33311e4 344.77307

Data File D:\DATA\TL\TL-6\TL-8 2018-07-09 21-09-18\028-0901.D  
Sample Name: TL-4-Cl-ph-ree

```
=====
Acq. Operator   :                               Seq. Line :    9
Acq. Instrument : Instrument 2                  Location  : Vial 28
Injection Date  : 7/10/2018 2:58:11 AM          Inj       :    1
                                           Inj Volume : 3.000 µl

Acq. Method     : D:\DATA\TL\TL-6\TL-8 2018-07-09 21-09-18\DAD-CJ(1-6)-80-20-1ML-3UL-ALL-
                    50MIN.M
Last changed    : 7/9/2018 9:28:06 PM
Analysis Method : D:\METHOD\LWD\DAD-AD(1-6)-95-5-1ML-2UL-ALL-20MIN.M
Last changed    : 8/20/2018 9:10:55 PM
                (modified after loading)
Additional Info : Peak(s) manually integrated
=====
```

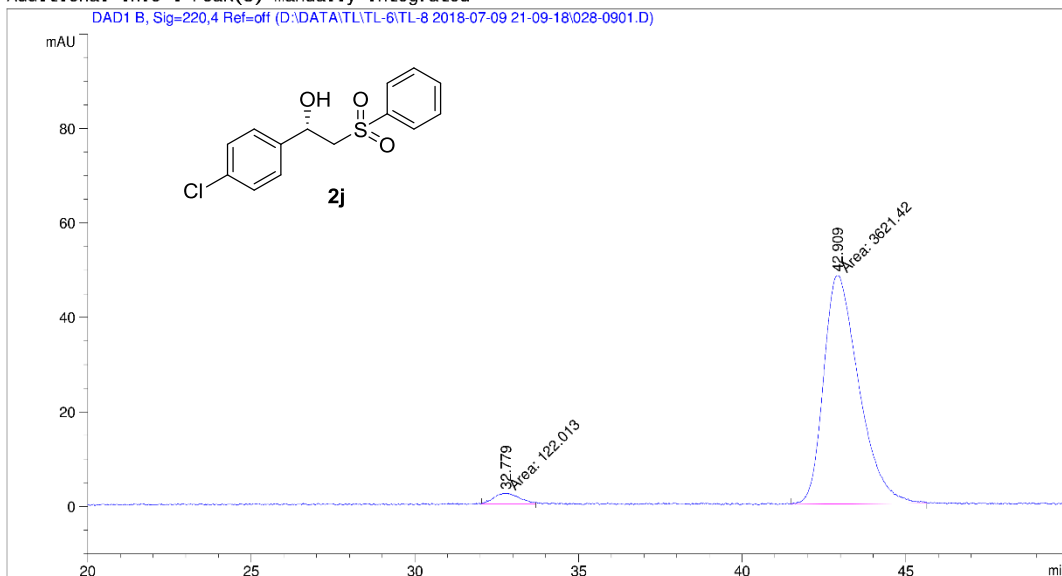

# Area Percent Report

```
=====
Sorted By      : Signal
Multiplier     : 1.0000
Dilution       : 1.0000
Use Multiplier & Dilution Factor with ISTDs
=====
```

Signal 1: DAD1 B, Sig=220,4 Ref=off

| Peak # | RetTime [min] | Type | Width [min] | Area [mAU*s] | Height [mAU] | Area %  |
|--------|---------------|------|-------------|--------------|--------------|---------|
| 1      | 32.779        | MM   | 0.9080      | 122.01331    | 2.23948      | 3.2594  |
| 2      | 42.909        | MM   | 1.2491      | 3621.41577   | 48.31980     | 96.7406 |

Totals : 3743.42908 50.55928

Data File D:\DATA\GU...NG\GYQB-INDOLE\GYQB-180723-TRI-RAC-1 2018-07-23 14-42-13\021-2501.D  
Sample Name: TL-ph-Me-rac

```
=====
Acq. Operator   :                               Seq. Line :   25
Acq. Instrument : Instrument 2                   Location  : Vial 21
Injection Date  : 7/24/2018 7:13:05 AM          Inj       :    1
                                           Inj Volume : 3.000 µl

Acq. Method     : D:\DATA\GUAN YUQING\GYQB-INDOLE\GYQB-180723-TRI-RAC-1 2018-07-23 14-42-13
                  \DAD-OJ(1-6)-80-20-1ML-3UL-ALL-70MIN.M
Last changed    : 6/28/2018 8:52:23 PM
Analysis Method : D:\METHOD\LWD\DAD-AD(1-6)-90-10-0.7ML-3UL-ALL-70MIN.M
Last changed    : 8/21/2018 9:42:45 AM
                  (modified after loading)
Additional Info  : Peak(s) manually integrated
=====
```

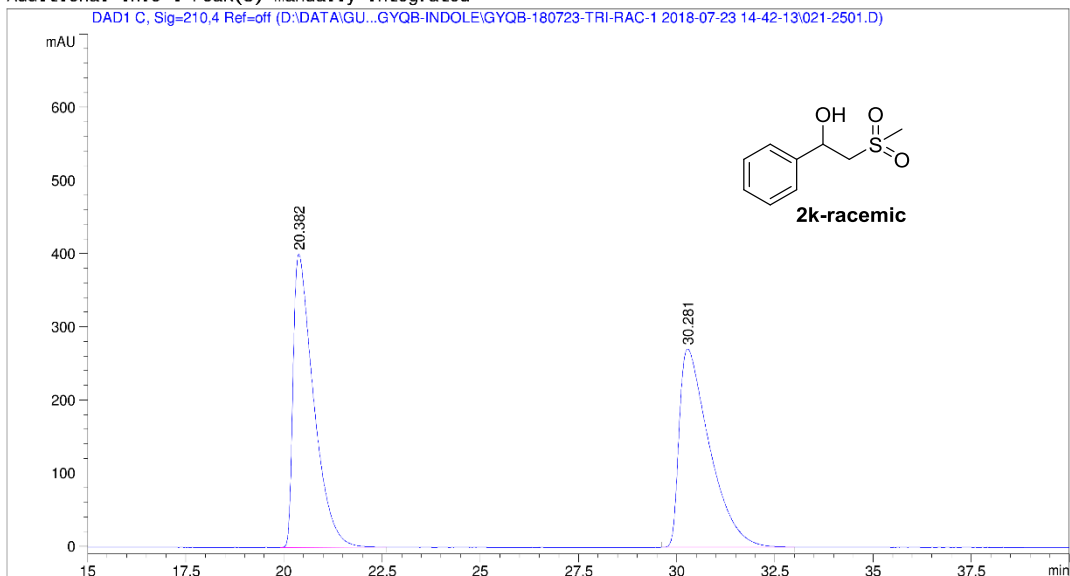

#### Area Percent Report

```
=====
Sorted By      :      Signal
Multiplier     :      1.0000
Dilution       :      1.0000
Use Multiplier & Dilution Factor with ISTDs
=====
```

Signal 1: DAD1 C, Sig=210,4 Ref=off

| Peak # | RetTime [min] | Type | Width [min] | Area [mAU*s] | Height [mAU] | Area %  |
|--------|---------------|------|-------------|--------------|--------------|---------|
| 1      | 20.382        | BB   | 0.5401      | 1.44845e4    | 400.36893    | 49.9424 |
| 2      | 30.281        | BB   | 0.7887      | 1.45179e4    | 271.13010    | 50.0576 |

Totals : 2.90025e4 671.49902

Data File D:\DATA\GU...NG\GYQB-INDOLE\GYQB-180723-TRI-RAC-1 2018-07-23 14-42-13\022-2601.D  
Sample Name: TL-ph-Me-ee

```
=====
Acq. Operator   :                               Seq. Line :   26
Acq. Instrument : Instrument 2                   Location  : Vial 22
Injection Date  : 7/24/2018 8:24:03 AM          Inj       :    1
                                           Inj Volume : 3.000 µl

Acq. Method     : D:\DATA\GUAN YUQING\GYQB-INDOLE\GYQB-180723-TRI-RAC-1 2018-07-23 14-42-13
                  \DAD-OJ(1-6)-80-20-1ML-3UL-ALL-70MIN.M
Last changed    : 7/24/2018 9:10:19 AM
                  (modified after loading)
Analysis Method : D:\METHOD\LWD\DAD-AD(1-6)-90-10-0.7ML-3UL-ALL-70MIN.M
Last changed    : 8/21/2018 9:42:45 AM
                  (modified after loading)
Additional Info  : Peak(s) manually integrated
```

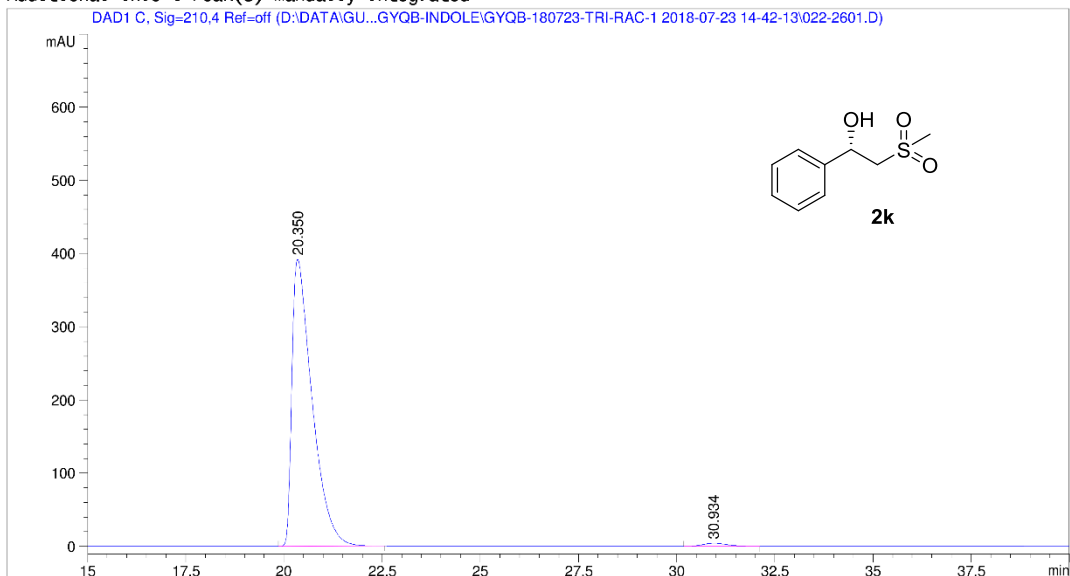

# Area Percent Report

```
=====
Sorted By      :      Signal
Multiplier     :      1.0000
Dilution       :      1.0000
Use Multiplier & Dilution Factor with ISTDs
```

Signal 1: DAD1 C, Sig=210,4 Ref=off

| Peak # | RetTime [min] | Type | Width [min] | Area [mAU*s] | Height [mAU] | Area %  |
|--------|---------------|------|-------------|--------------|--------------|---------|
| 1      | 20.350        | BB   | 0.5244      | 1.39980e4    | 392.23517    | 98.6656 |
| 2      | 30.934        | BB   | 0.5349      | 189.31180    | 4.23998      | 1.3344  |

Totals : 1.41873e4 396.47515



Data File D:\DATA\YCC\20180630\YCC-264-34 2018-07-12 18-34-01\073-1901.D  
Sample Name: TL-2-F-Me-rac

```
=====
Acq. Operator   :                               Seq. Line :   19
Acq. Instrument : Instrument 2                   Location  : Vial 73
Injection Date  : 7/13/2018 3:29:59 AM           Inj       :    1
                                           Inj Volume: 3.000 µl

Acq. Method     : D:\DATA\YCC\20180630\YCC-264-34 2018-07-12 18-34-01\DAD-QJ(1-6)-80-20-1ML-
                  3UL-ALL-25MIN.M
Last changed    : 7/12/2018 10:13:08 PM
Analysis Method : D:\METHOD\LWD\DAD-AD(1-6)-95-5-1ML-2UL-ALL-20MIN.M
Last changed    : 8/20/2018 10:03:57 PM
                  (modified after loading)
Additional Info : Peak(s) manually integrated
=====
```

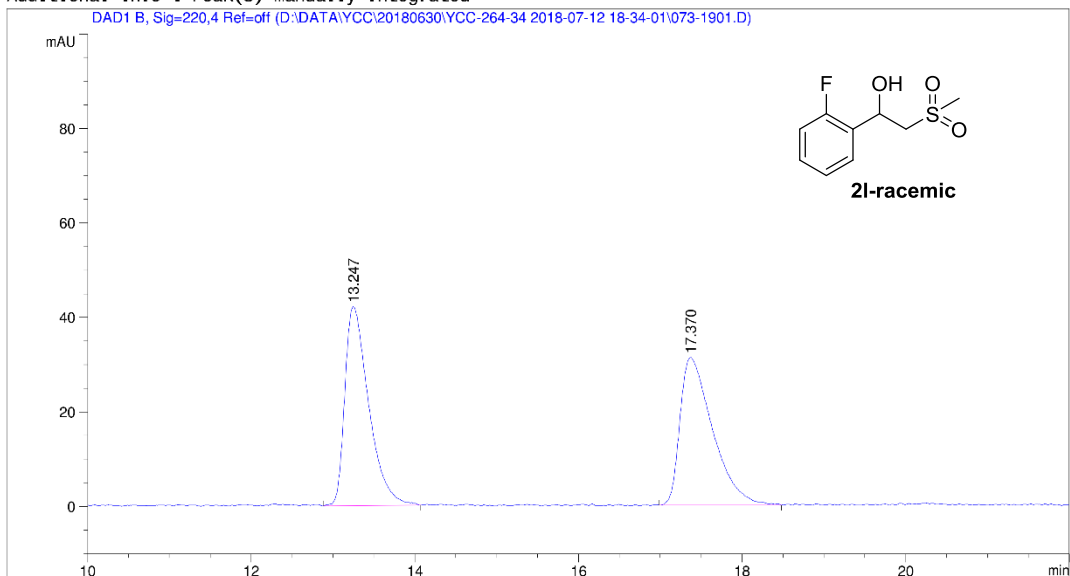

# Area Percent Report

```
=====
Sorted By      :      Signal
Multiplier     :      1.0000
Dilution       :      1.0000
Use Multiplier & Dilution Factor with ISTDs
=====
```

Signal 1: DAD1 B, Sig=220,4 Ref=off

| Peak # | RetTime [min] | Type | Width [min] | Area [mAU*s] | Height [mAU] | Area %  |
|--------|---------------|------|-------------|--------------|--------------|---------|
| 1      | 13.247        | BB   | 0.2888      | 855.37360    | 42.14367     | 49.7959 |
| 2      | 17.370        | BB   | 0.3838      | 862.38611    | 31.26658     | 50.2041 |

Totals : 1717.75970 73.41025

Data File D:\DATA\YCC\20180630\YCC-264-34 2018-07-12 18-34-01\074-2001.D  
Sample Name: TL-2-F-Me-ee

```
=====
Acq. Operator   :                               Seq. Line :   20
Acq. Instrument : Instrument 2                   Location  : Vial 74
Injection Date  : 7/13/2018 3:56:01 AM           Inj       :    1
                                           Inj Volume : 3.000 µl

Acq. Method     : D:\DATA\YCC\20180630\YCC-264-34 2018-07-12 18-34-01\DAD-QJ(1-6)-80-20-1ML-
                  3UL-ALL-25MIN.M
Last changed    : 7/12/2018 10:13:08 PM
Analysis Method : D:\METHOD\LWD\DAD-AD(1-6)-95-5-1ML-2UL-ALL-20MIN.M
Last changed    : 8/20/2018 10:04:47 PM
                  (modified after loading)
Additional Info : Peak(s) manually integrated
=====
```

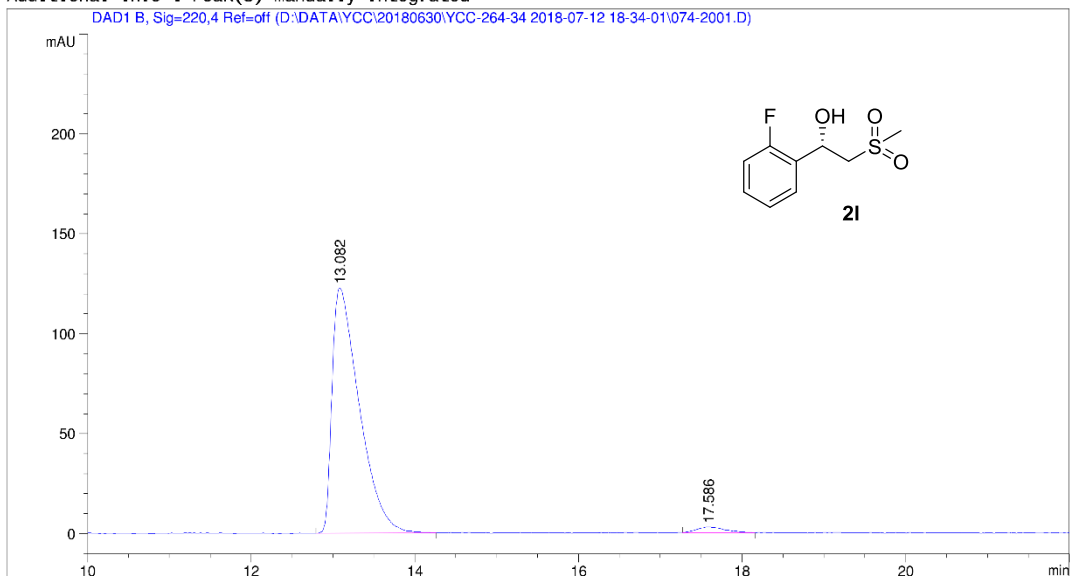

#### Area Percent Report

```
=====
Sorted By      : Signal
Multiplier     : 1.0000
Dilution       : 1.0000
Use Multiplier & Dilution Factor with ISTDs
=====
```

Signal 1: DAD1 B, Sig=220,4 Ref=off

| Peak # | RetTime [min] | Type | Width [min] | Area [mAU*s] | Height [mAU] | Area %  |
|--------|---------------|------|-------------|--------------|--------------|---------|
| 1      | 13.082        | BB   | 0.3272      | 2833.36401   | 122.77251    | 97.4357 |
| 2      | 17.586        | VV   | 0.2947      | 74.56754     | 3.01312      | 2.5643  |

Totals : 2907.93155 125.78562

Data File D:\DATA\YCC\20180720\YCC-270-2 2018-07-20 11-43-53\061-3101.D  
Sample Name: TL-3-Br-Me-rac

```
=====
Acq. Operator   :                               Seq. Line :   31
Acq. Instrument : Instrument 2                  Location  : Vial 61
Injection Date  : 7/21/2018 4:31:55 AM          Inj       :    1
                                                Inj Volume: 3.000 µl

Acq. Method     : D:\DATA\YCC\20180720\YCC-270-2 2018-07-20 11-43-53\DAD-QJ(1-6)-80-20-1ML-
                  3UL-ALL-40MIN.M
Last changed    : 7/9/2018 9:06:51 PM
Analysis Method : D:\METHOD\LWD\DAD-AD(1-6)-95-5-1ML-2UL-ALL-20MIN.M
Last changed    : 8/20/2018 10:07:47 PM
                  (modified after loading)
Additional Info : Peak(s) manually integrated
=====
```

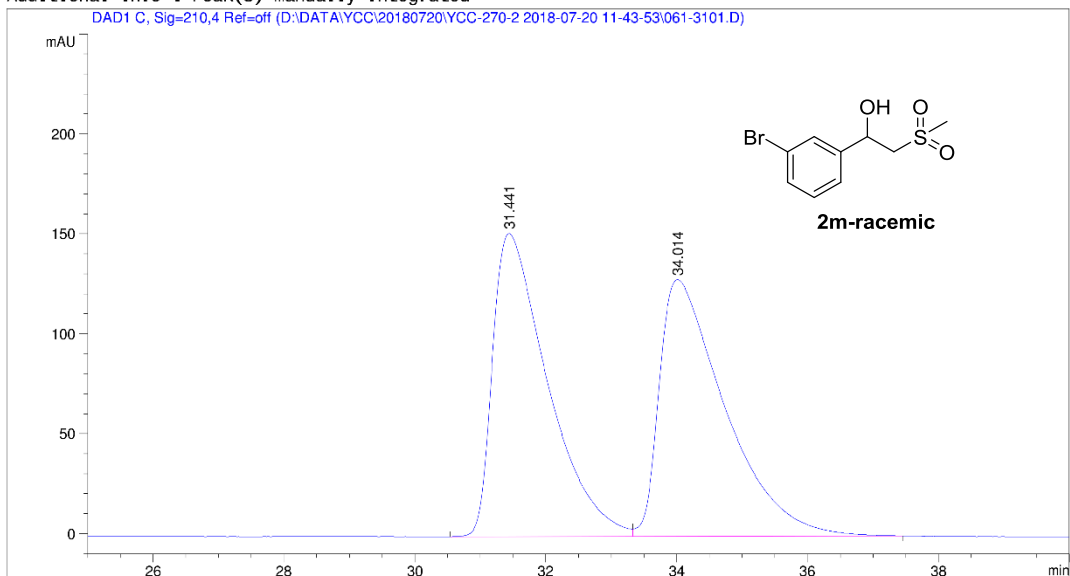

# Area Percent Report

```
=====
Sorted By      :      Signal
Multiplier     :      1.0000
Dilution       :      1.0000
Use Multiplier & Dilution Factor with ISTDs
=====
```

Signal 1: DAD1 C, Sig=210,4 Ref=off

| Peak # | RetTime [min] | Type | Width [min] | Area [mAU*s] | Height [mAU] | Area %  |
|--------|---------------|------|-------------|--------------|--------------|---------|
| 1      | 31.441        | BV   | 0.8283      | 8846.16699   | 151.69662    | 49.7556 |
| 2      | 34.014        | VB   | 0.9737      | 8933.06934   | 128.39050    | 50.2444 |

Totals : 1.77792e4 280.08713

Sample Name: TL-3-Br-Me-ee

```

=====
Acq. Operator   :                               Seq. Line :   32
Acq. Instrument : Instrument 2                   Location  : Vial 62
Injection Date  : 7/21/2018 5:12:55 AM           Inj       :    1
                                           Inj Volume : 3.000 µl

Acq. Method     : D:\DATA\YCC\20180720\YCC-270-2 2018-07-20 11-43-53\DAD-QJ(1-6)-80-20-1ML-
                  3UL-ALL-40MIN.M
Last changed    : 7/9/2018 9:06:51 PM
Analysis Method : D:\METHOD\LWD\DAD-AD(1-6)-95-5-1ML-2UL-ALL-20MIN.M
Last changed    : 8/20/2018 10:09:09 PM
                  (modified after loading)
Additional Info  : Peak(s) manually integrated
  
```

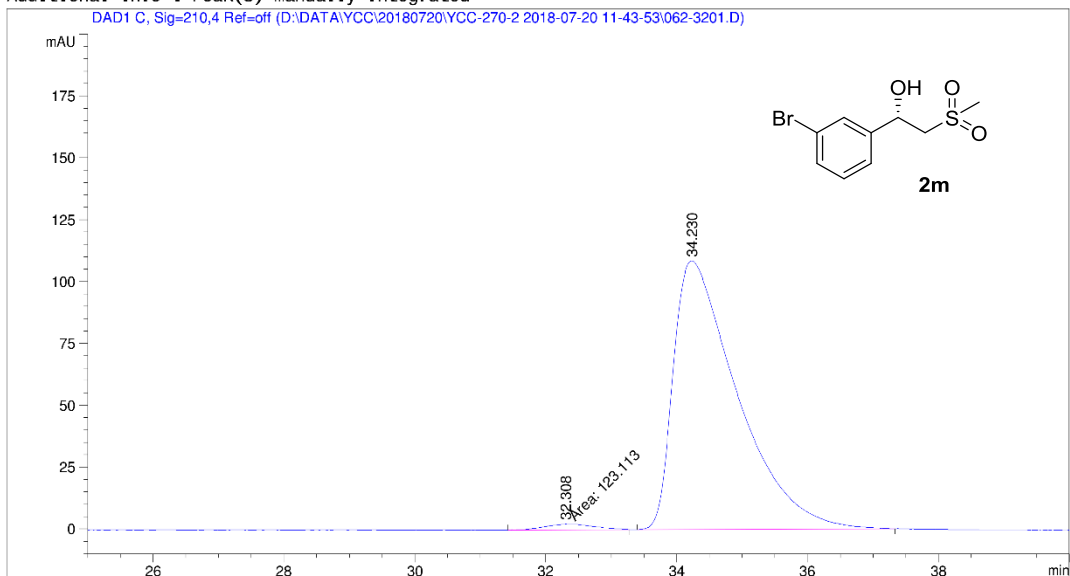

# Area Percent Report

```

=====
Sorted By      :      Signal
Multiplier     :      1.0000
Dilution       :      1.0000
Use Multiplier & Dilution Factor with ISTDs
  
```

Signal 1: DAD1 C, Sig=210,4 Ref=off

| Peak # | RetTime [min] | Type | Width [min] | Area [mAU*s] | Height [mAU] | Area %  |
|--------|---------------|------|-------------|--------------|--------------|---------|
| 1      | 32.308        | MM   | 0.8635      | 123.11281    | 2.37613      | 1.6439  |
| 2      | 34.230        | BB   | 0.9462      | 7366.04248   | 108.48158    | 98.3561 |

Totals : 7489.15529 110.85770

Data File D:\DATA\TL\TL-3\TL-5 2018-06-15 20-55-12\011-0201.D  
Sample Name: TL-4-Me-Me-rac

```
=====
Acq. Operator   :                               Seq. Line :    2
Acq. Instrument : Instrument 2                  Location  : Vial 11
Injection Date  : 6/15/2018 9:07:15 PM          Inj       :    1
                                           Inj Volume : 3.000 µl

Acq. Method     : D:\DATA\TL\TL-3\TL-5 2018-06-15 20-55-12\DAD-OD(1-2)-80-20-1ML-3UL-ALL-
                  20MIN.M
Last changed    : 6/15/2018 8:44:57 PM
Analysis Method : D:\METHOD\LWD\DAD-AD(1-6)-95-5-1ML-2UL-ALL-20MIN.M
Last changed    : 8/20/2018 9:04:12 PM
                  (modified after loading)
Additional Info  : Peak(s) manually integrated
=====
```

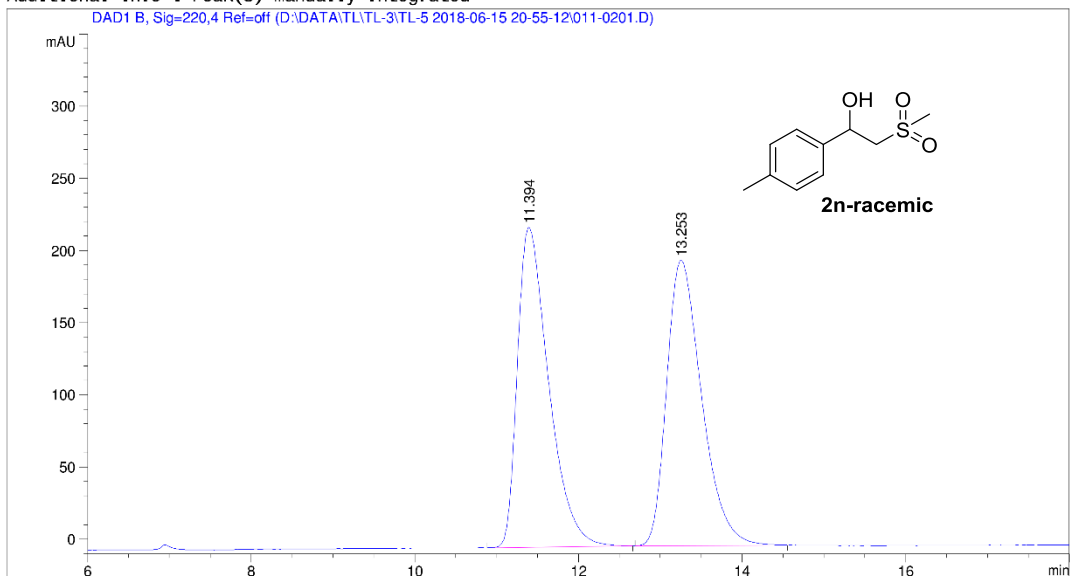

#### Area Percent Report

```
=====
Sorted By      : Signal
Multiplier     : 1.0000
Dilution       : 1.0000
Use Multiplier & Dilution Factor with ISTDs
=====
```

Signal 1: DAD1 B, Sig=220,4 Ref=off

| Peak # | RetTime [min] | Type | Width [min] | Area [mAU*s] | Height [mAU] | Area %  |
|--------|---------------|------|-------------|--------------|--------------|---------|
| 1      | 11.394        | BB   | 0.3997      | 5879.39258   | 221.48277    | 50.0507 |
| 2      | 13.253        | BB   | 0.4544      | 5867.47217   | 197.60023    | 49.9493 |

Totals : 1.17469e4 419.08301

Data File D:\DATA\TL\TL-3\TL-5 2018-06-15 20-55-12\012-0301.D  
Sample Name: TL-4-Me-Me-ee

=====

|                                               |   |                                                                                |            |   |          |
|-----------------------------------------------|---|--------------------------------------------------------------------------------|------------|---|----------|
| Acq. Operator                                 | : |                                                                                | Seq. Line  | : | 3        |
| Acq. Instrument                               | : | Instrument 2                                                                   | Location   | : | Vial 12  |
| Injection Date                                | : | 6/15/2018 9:28:09 PM                                                           | Inj        | : | 1        |
|                                               |   |                                                                                | Inj Volume | : | 3.000 µl |
| Acq. Method                                   | : | D:\DATA\TL\TL-3\TL-5 2018-06-15 20-55-12\DAD-OD(1-2)-80-20-1ML-3UL-ALL-20MIN.M |            |   |          |
| Last changed                                  | : | 6/15/2018 8:44:57 PM                                                           |            |   |          |
| Analysis Method                               | : | D:\METHOD\LWD\DAD-AD(1-6)-95-5-1ML-2UL-ALL-20MIN.M                             |            |   |          |
| Last changed                                  | : | 8/20/2018 9:04:12 PM                                                           |            |   |          |
|                                               |   | (modified after loading)                                                       |            |   |          |
| Additional Info : Peak(s) manually integrated |   |                                                                                |            |   |          |

DAD1 B, Sig=220,4 Ref=off (D:\DATA\TL\TL-3\TL-5 2018-06-15 20-55-12\012-0301.D)

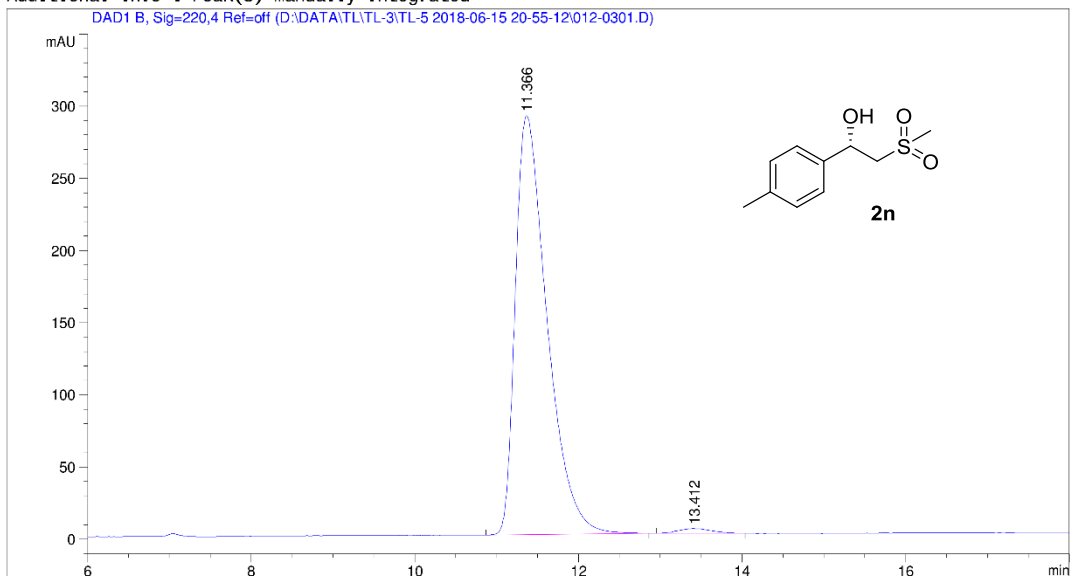

=====  
Area Percent Report  
=====

Sorted By : Signal  
Multiplier : 1.0000  
Dilution : 1.0000  
Use Multiplier & Dilution Factor with ISTDs

Signal 1: DAD1 B, Sig=220,4 Ref=off

| Peak # | RetTime [min] | Type | Width [min] | Area [mAU*s] | Height [mAU] | Area %  |
|--------|---------------|------|-------------|--------------|--------------|---------|
| 1      | 11.366        | BB   | 0.3982      | 7818.25342   | 290.28690    | 98.8301 |
| 2      | 13.412        | BB   | 0.3304      | 92.54990     | 3.32796      | 1.1699  |

Totals : 7910.80331 293.61485

Data File D:\DATA\TL\TL-6\TL-8 2018-07-09 21-09-18\029-1001.D  
Sample Name: TL-4-Cl-Me-rac

```
=====
Acq. Operator   :                               Seq. Line :   10
Acq. Instrument : Instrument 2                   Location  : Vial 29
Injection Date  : 7/10/2018 3:49:11 AM           Inj       :    1
                                           Inj Volume : 3.000 µl

Acq. Method     : D:\DATA\TL\TL-6\TL-8 2018-07-09 21-09-18\DAD-CJ(1-6)-80-20-1ML-3UL-ALL-
                  40MIN.M
Last changed    : 7/9/2018 9:06:51 PM
Analysis Method : D:\METHOD\LWD\DAD-AD(1-6)-95-5-1ML-2UL-ALL-20MIN.M
Last changed    : 8/20/2018 9:29:35 PM
                  (modified after loading)
Additional Info : Peak(s) manually integrated
=====
```

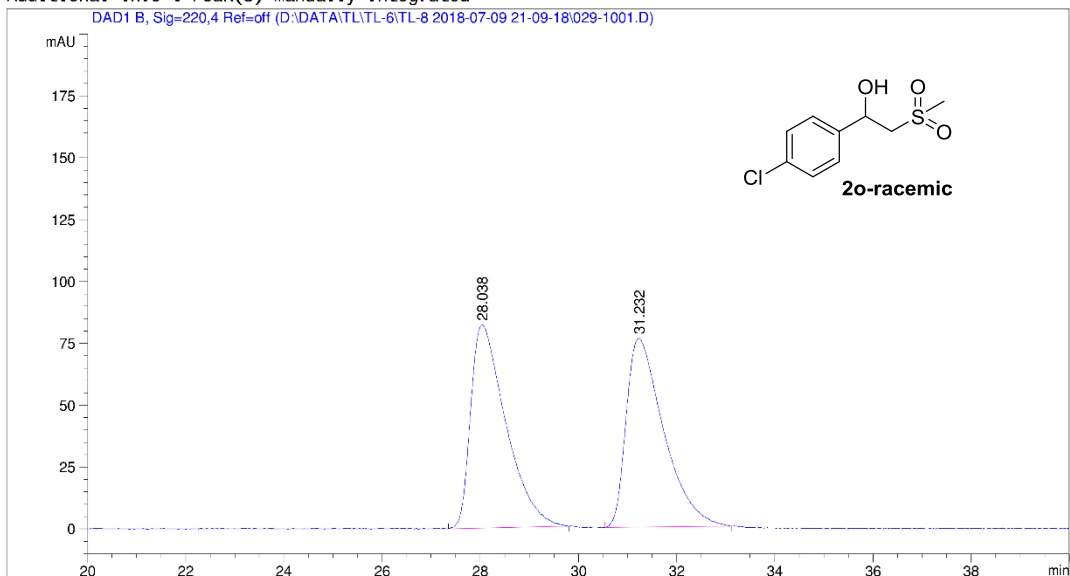

# Area Percent Report

```
=====
Sorted By      :      Signal
Multiplier     :      1.0000
Dilution       :      1.0000
Use Multiplier & Dilution Factor with ISTDs
=====
```

Signal 1: DAD1 B, Sig=220,4 Ref=off

| Peak # | RetTime [min] | Type | Width [min] | Area [mAU*s] | Height [mAU] | Area %  |
|--------|---------------|------|-------------|--------------|--------------|---------|
| 1      | 28.038        | BB   | 0.6477      | 4075.72192   | 82.03175     | 50.1508 |
| 2      | 31.232        | BB   | 0.6333      | 4051.21313   | 76.32463     | 49.8492 |

Totals : 8126.93506 158.35638

Data File D:\DATA\TL\TL-6\TL-8 2018-07-09 21-09-18\030-1101.D  
Sample Name: TL-4-Cl-Me-ee

```
=====
Acq. Operator   :                               Seq. Line :   11
Acq. Instrument : Instrument 2                  Location  : Vial 30
Injection Date  : 7/10/2018 4:30:11 AM          Inj       :    1
                                           Inj Volume : 3.000 µl

Acq. Method     : D:\DATA\TL\TL-6\TL-8 2018-07-09 21-09-18\DAD-CJ(1-6)-80-20-1ML-3UL-ALL-
                  40MIN.M
Last changed    : 7/9/2018 9:06:51 PM
Analysis Method : D:\METHOD\LWD\DAD-AD(1-6)-95-5-1ML-2UL-ALL-20MIN.M
Last changed    : 8/20/2018 9:32:02 PM
                  (modified after loading)
Additional Info  : Peak(s) manually integrated
=====
```

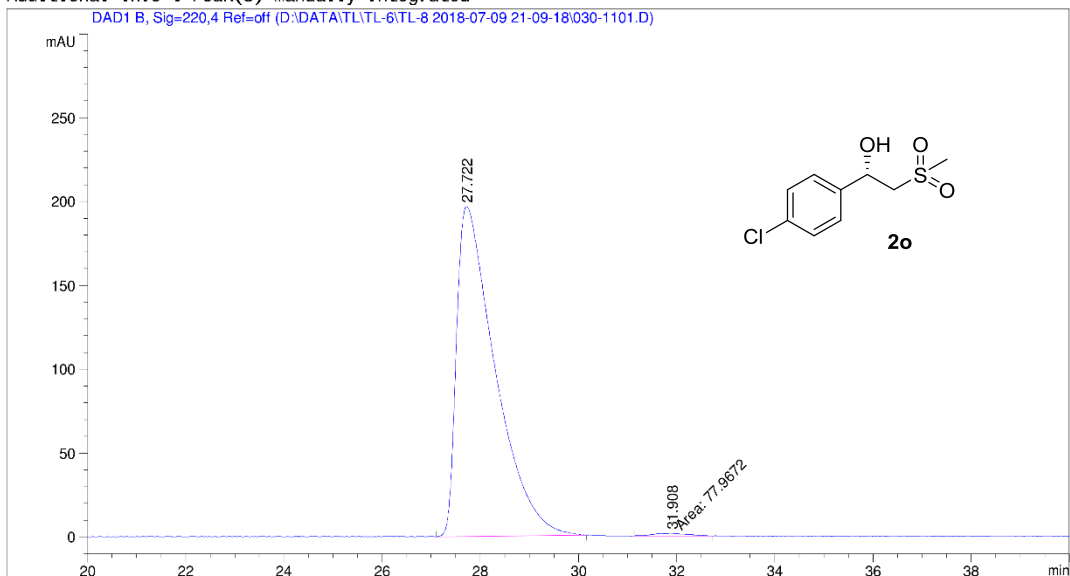

# Area Percent Report

```
=====
Sorted By      :      Signal
Multiplier     :      1.0000
Dilution       :      1.0000
Use Multiplier & Dilution Factor with ISTDs
=====
```

Signal 1: DAD1 B, Sig=220,4 Ref=off

| Peak # | RetTime [min] | Type | Width [min] | Area [mAU*s] | Height [mAU] | Area %  |
|--------|---------------|------|-------------|--------------|--------------|---------|
| 1      | 27.722        | BB   | 0.7384      | 1.07300e4    | 196.69144    | 99.2786 |
| 2      | 31.908        | MM   | 0.8399      | 77.96723     | 1.54711      | 0.7214  |

Totals : 1.08080e4 198.23854



Data File D:\DATA\YCC\20180630\YCC-264-34 2018-07-12 18-34-01\071-1601.D  
Sample Name: TL-4-MeO-Me-rac

```
=====
Acq. Operator   :                               Seq. Line :   16
Acq. Instrument : Instrument 2                   Location  : Vial 71
Injection Date  : 7/13/2018 12:56:55 AM          Inj       :    1
                                           Inj Volume : 10.000 µl

Acq. Method     : D:\DATA\YCC\20180630\YCC-264-34 2018-07-12 18-34-01\DAD-QJ(1-6)-80-20-1ML-
                  10UL-ALL-70MIN.M
Last changed    : 7/12/2018 10:08:47 PM
Analysis Method : D:\METHOD\LWD\DAD-AD(1-6)-95-5-1ML-2UL-ALL-20MIN.M
Last changed    : 8/20/2018 9:23:56 PM
                  (modified after loading)
Additional Info : Peak(s) manually integrated
=====
```

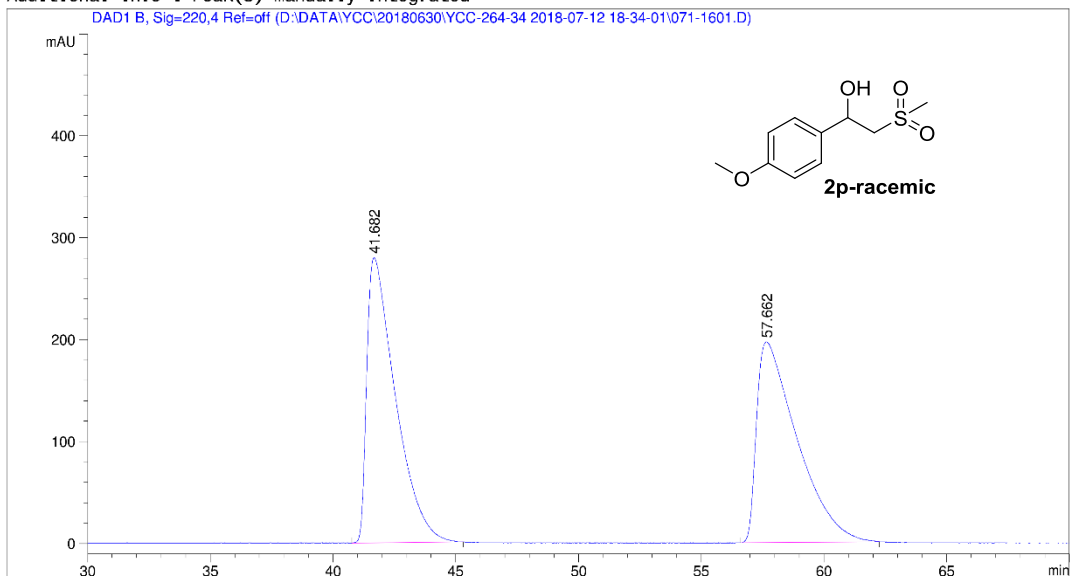

#### Area Percent Report

```
=====
Sorted By      : Signal
Multiplier     : 1.0000
Dilution       : 1.0000
Use Multiplier & Dilution Factor with ISTDs
=====
```

Signal 1: DAD1 B, Sig=220,4 Ref=off

| Peak # | RetTime [min] | Type | Width [min] | Area [mAU*s] | Height [mAU] | Area %  |
|--------|---------------|------|-------------|--------------|--------------|---------|
| 1      | 41.682        | BB   | 1.0604      | 2.26575e4    | 279.91312    | 50.1260 |
| 2      | 57.662        | BB   | 1.3553      | 2.25436e4    | 196.96117    | 49.8740 |

Totals : 4.52010e4 476.87428

Data File D:\DATA\YCC\20180630\YCC-264-34 2018-07-12 18-34-01\072-1701.D  
Sample Name: TL-4-MeO-Me-ee

```
=====
Acq. Operator   :                               Seq. Line :   17
Acq. Instrument : Instrument 2                  Location  : Vial 72
Injection Date  : 7/13/2018 2:07:59 AM         Inj       :    1
                                           Inj Volume : 3.000 µl

Acq. Method     : D:\DATA\YCC\20180630\YCC-264-34 2018-07-12 18-34-01\DAD-QJ(1-6)-80-20-1ML-
                  3UL-ALL-70MIN.M
Last changed    : 6/28/2018 8:52:23 PM
Analysis Method : D:\METHOD\LWD\DAD-AD(1-6)-95-5-1ML-2UL-ALL-20MIN.M
Last changed    : 8/20/2018 9:26:49 PM
                  (modified after loading)
Additional Info : Peak(s) manually integrated
=====
```

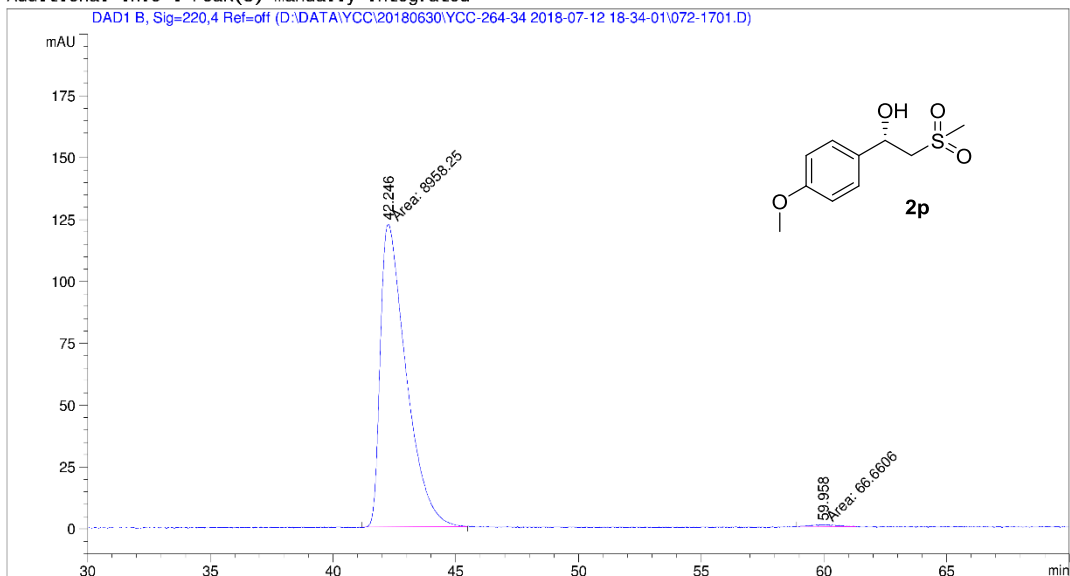

# Area Percent Report

```
=====
Sorted By      :      Signal
Multiplier     :      1.0000
Dilution       :      1.0000
Use Multiplier & Dilution Factor with ISTDs
=====
```

Signal 1: DAD1 B, Sig=220,4 Ref=off

| Peak # | RetTime [min] | Type | Width [min] | Area [mAU*s] | Height [mAU] | Area %  |
|--------|---------------|------|-------------|--------------|--------------|---------|
| 1      | 42.246        | MM   | 1.2194      | 8958.25293   | 122.44077    | 99.2614 |
| 2      | 59.958        | MM   | 1.2371      | 66.66060     | 8.98066e-1   | 0.7386  |

Totals : 9024.91353 123.33884

Data File D:\DATA\LWD\LWD-3-30-1\LWD-3-30-1 2018-07-13 11-19-42\071-4301.D  
Sample Name: TL-funan-ph

```
=====
Acq. Operator   :                               Seq. Line :   43
Acq. Instrument : Instrument 2                  Location  : Vial 71
Injection Date  : 7/14/2018 12:41:17 PM         Inj       :    1
                                           Inj Volume : 3.000 µl

Acq. Method     : D:\DATA\LWD\LWD-3-30-1\LWD-3-30-1 2018-07-13 11-19-42\DAD-QJ(1-6)-80-20-1ML
                  -3UL-ALL-70MIN.M
Last changed    : 6/28/2018 8:52:23 PM
Analysis Method : D:\METHOD\YCC\DAD-QJ(1-6)-80-20-1ML-1UL-ALL-60MIN.M
Last changed    : 11/6/2018 9:10:01 PM
                  (modified after loading)
Additional Info : Peak(s) manually integrated
=====
```

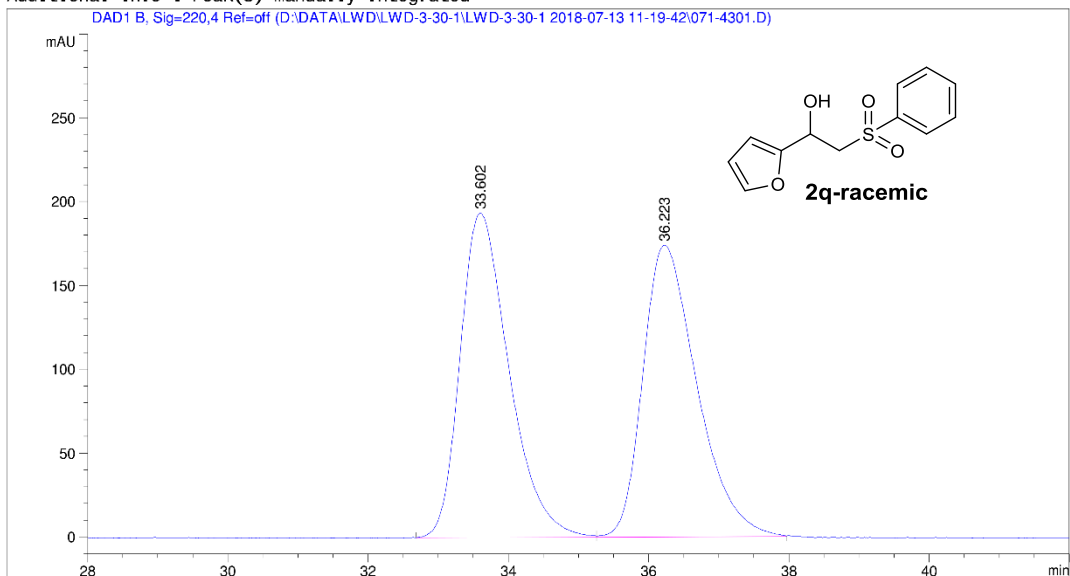

#### Area Percent Report

```
=====
Sorted By      : Signal
Multiplier     : 1.0000
Dilution       : 1.0000
Use Multiplier & Dilution Factor with ISTDs
=====
```

Signal 1: DAD1 B, Sig=220,4 Ref=off

| Peak # | RetTime [min] | Type | Width [min] | Area [mAU*s] | Height [mAU] | Area %  |
|--------|---------------|------|-------------|--------------|--------------|---------|
| 1      | 33.602        | BV   | 0.6659      | 9356.62012   | 193.59761    | 50.1146 |
| 2      | 36.223        | VV   | 0.7561      | 9313.82422   | 174.11975    | 49.8854 |

Totals : 1.86704e4 367.71736

Data File D:\DATA\LG\201810\20181011-4CL 2018-10-11 08-51-43\051-1001.D  
Sample Name: TL-funan-ph-ee

```
=====
Acq. Operator   :                               Seq. Line :   10
Acq. Instrument : Instrument 2                  Location  : Vial 51
Injection Date  : 10/11/2018 1:18:47 PM         Inj       :    1
                                           Inj Volume : 3.000 µl

Acq. Method     : D:\DATA\LG\201810\20181011-4CL 2018-10-11 08-51-43\DAD-QJ(1-6)-80-20-1ML-
                  3UL-ALL-55MIN.M
Last changed    : 7/9/2018 9:15:39 PM
Analysis Method : D:\METHOD\YCC\DAD-QJ(1-6)-80-20-1ML-1UL-ALL-60MIN.M
Last changed    : 11/6/2018 9:13:59 PM
                  (modified after loading)
Additional Info  : Peak(s) manually integrated
=====
```

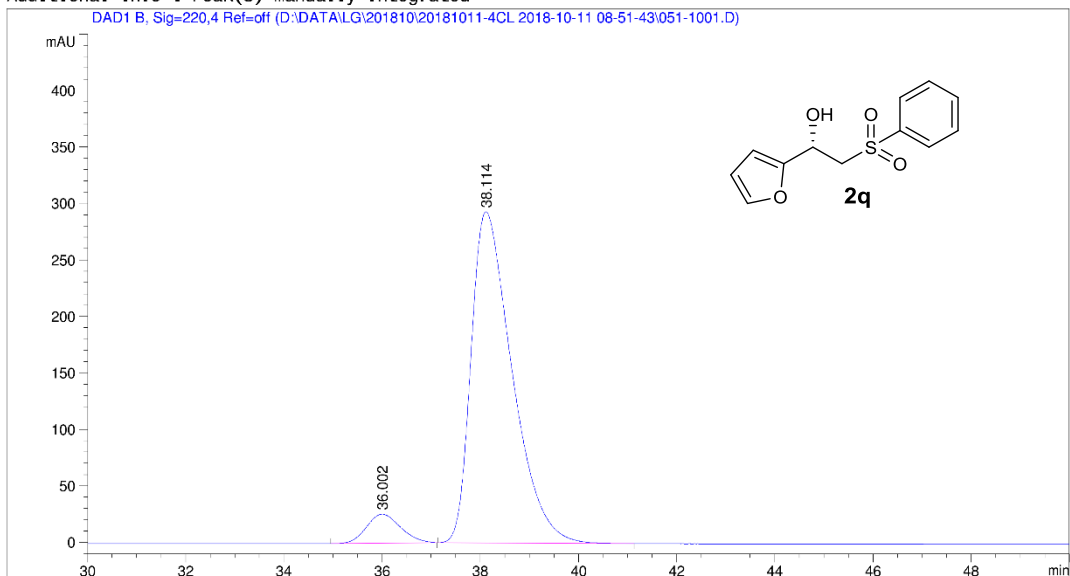

# Area Percent Report

```
=====
Sorted By      :      Signal
Multiplier     :      1.0000
Dilution       :      1.0000
Use Multiplier & Dilution Factor with ISTDs
=====
```

Signal 1: DAD1 B, Sig=220,4 Ref=off

| Peak # | RetTime [min] | Type | Width [min] | Area [mAU*s] | Height [mAU] | Area %  |
|--------|---------------|------|-------------|--------------|--------------|---------|
| 1      | 36.002        | BB   | 0.7172      | 1234.81213   | 25.58069     | 6.7816  |
| 2      | 38.114        | BB   | 0.8775      | 1.69735e4    | 293.14279    | 93.2184 |

Totals : 1.82083e4 318.72349

Data File D:\DATA\LWD\LWD-LY-RAC\LWD-LY-RAC 2018-10-23 08-29-09\041-0901.D  
Sample Name: TL-C-HEX-PH-RAC

=====

Acq. Operator : Seq. Line : 9  
Acq. Instrument : Instrument 2 Location : Vial 41  
Injection Date : 10/23/2018 12:29:02 PM Inj : 1  
Inj Volume : 3.000 µl

Acq. Method : D:\DATA\LWD\LWD-LY-RAC\LWD-LY-RAC 2018-10-23 08-29-09\DAD-AD(1-6)-80-20-0.  
7ML-3UL-ALL-60MIN.M

Last changed : 10/23/2018 11:24:12 AM  
Analysis Method : D:\METHOD\LWD\DAD-AD(1-2)-80-20-1ML-3UL-ALL-10MIN.M  
Last changed : 11/17/2018 3:39:49 PM  
(modified after loading)

Additional Info : Peak(s) manually integrated

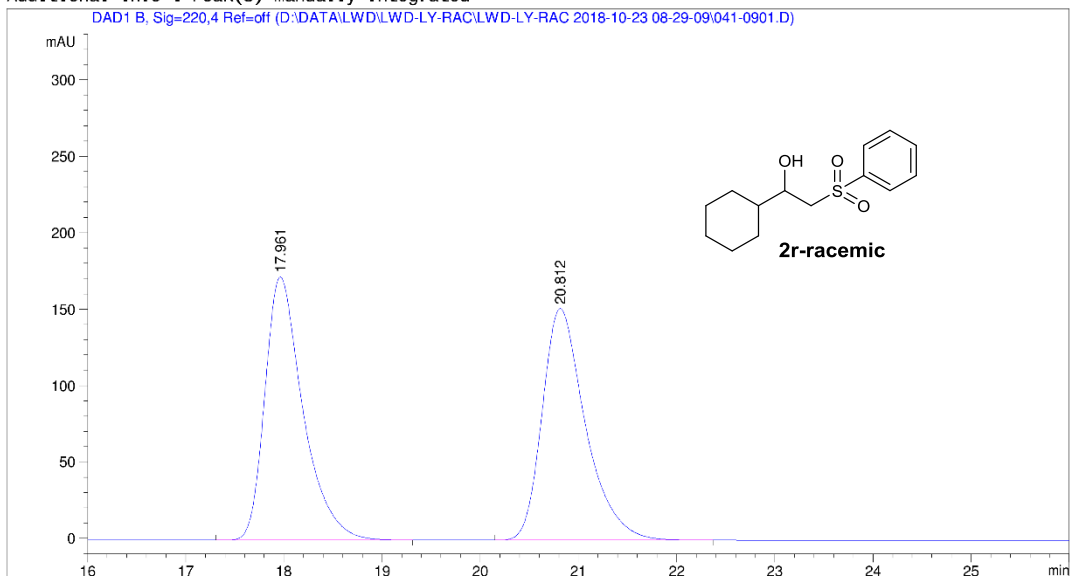

=====  
Area Percent Report  
=====

Sorted By : Signal  
Multiplier : 1.0000  
Dilution : 1.0000  
Use Multiplier & Dilution Factor with ISTDs

Signal 1: DAD1 B, Sig=220,4 Ref=off

| Peak # | RetTime [min] | Type | Width [min] | Area [mAU*s] | Height [mAU] | Area %  |
|--------|---------------|------|-------------|--------------|--------------|---------|
| 1      | 17.961        | BB   | 0.4041      | 4637.86182   | 172.27362    | 50.0004 |
| 2      | 20.812        | BB   | 0.4589      | 4637.79004   | 151.59140    | 49.9996 |

Totals : 9275.65186 323.86502

Data File D:\DATA\LWD\LWD-4-158-7\LWD-4-158-7 2018-11-16 20-13-44\071-0501.D  
Sample Name: TL-c-hex-ph-ee

```
=====
Acq. Operator   :                               Seq. Line :    5
Acq. Instrument : Instrument 1                  Location  : Vial 71
Injection Date  : 11/16/2018 9:47:56 PM        Inj       :    1
                                           Inj Volume : 3.000 µl

Acq. Method     : D:\DATA\LWD\LWD-4-158-7\LWD-4-158-7 2018-11-16 20-13-44\VWD-AD(1-2)-80-20-0
                  .7ML-3UL-220NM-30MIN.M
Last changed    : 11/16/2018 8:26:32 PM
Analysis Method : D:\METHOD\LWD\DAD-AD(1-2)-80-20-1ML-3UL-ALL-10MIN.M
Last changed    : 11/17/2018 3:36:36 PM
                  (modified after loading)
Additional Info : Peak(s) manually integrated
=====
```

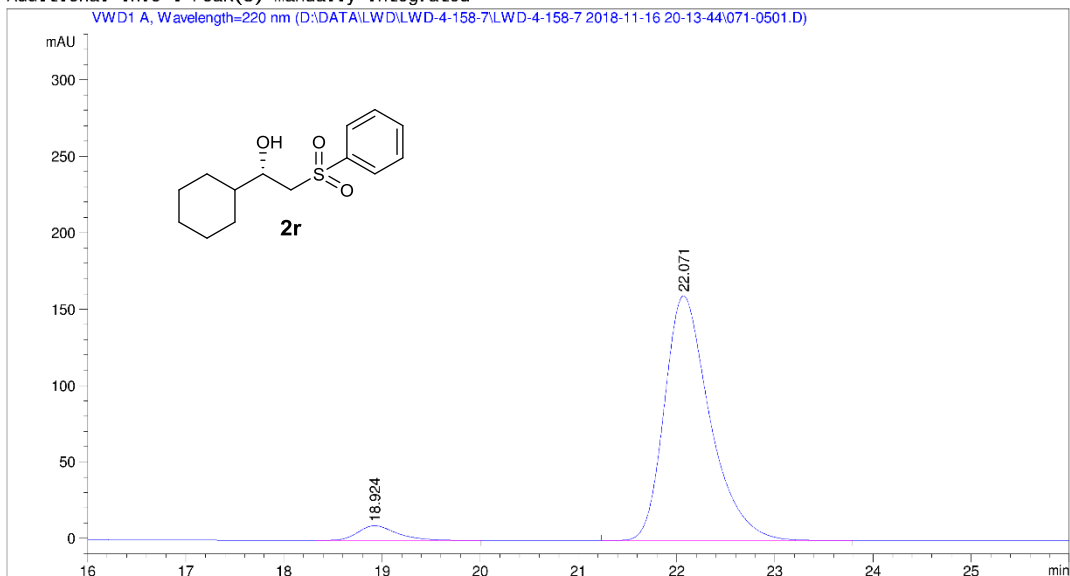

#### Area Percent Report

```
=====
Sorted By      : Signal
Multiplier     : 1.0000
Dilution       : 1.0000
Use Multiplier & Dilution Factor with ISTDs
=====
```

Signal 1: VWD1 A, Wavelength=220 nm

| Peak # | RetTime [min] | Type | Width [min] | Area [mAU*s] | Height [mAU] | Area %  |
|--------|---------------|------|-------------|--------------|--------------|---------|
| 1      | 18.924        | BB   | 0.4121      | 263.78177    | 9.61526      | 4.8706  |
| 2      | 22.071        | BB   | 0.4855      | 5151.99707   | 160.06735    | 95.1294 |

Totals : 5415.77884 169.68261

## 6. Reference

1. N. Suryakiran, T. Srikanth Reddy, K. Ashalatha, M. Lakshman, Y. Venkateswarlu, *Tetrahedron Lett.*, 2006, **47**, 3853.
2. (a) N.-C. Hsueh, H.-Y. Chen, M.-Y. Chang, *J. Org. Chem.*, 2014, **82**, 13324; (b) M.-Y. Chang, H.-Y. Chen, Y.-H. Chen, *J. Org. Chem.*, 2014, **82**, 12631; (c) C.-K. Chan and M.-Y. Chang, *ARKIVOC*, 2016, **5**, 390; (d) M.-Y. Chang, C.-K. Chan, Y.-C. Chen, *Heterocycles*, 2014, **89**, 1229.
3. G. Zhao, J. B. Hu, Z. S. Qian, W. X. Yin, *Tetrahedron: Asymmetry*, 2002, **13**, 2095.
4. P. Bertus, P. Phansavath, V. Ratovelomanana-Vidal, J.-P. Genêt, A. R. Touati, T. Homri, H. B. Ben, *Tetrahedron: Asymmetry*, 1999, **10**, 1369.
